# Supplementary material
Source: PubMed Central journal article supplement (PMC9211765)

# Supplementary Material

## Mendelian Randomisation Study of Smoking, Alcohol, and Coffee Drinking in Relation to Parkinson's Disease

### Supplementary Methods

#### *Courage-PD international consortium*

The Courage-PD (COMprehensive Unbiased Risk Factor Assessment for Genetics and Environment in Parkinson's Disease) international consortium pooled individual-level data from 35 studies on Parkinson's disease (PD) from different populations worldwide and used the same array to genotype their participants.

The Geo-PD (Genetic Epidemiology Of Parkinson's disease; <https://geopd.biomedinfo.org/>) consortium represents one of the components of Courage-PD. This consortium aims at conducting collaborative studies on genetic susceptibility in PD; one of its main features is that participating sites are distributed in the five continents, therefore representing a highly diverse population. In addition, several other studies from Europe contributed to Courage-PD. PD was diagnosed using standard criteria (United Kingdom Parkinson's Disease Society Brain Bank - UKPDSBB, Gelb, Bower) [1-3].

All studies were approved by local ethical committees following the procedures of each country, and material transfer agreements were set up between participating sites and the University of Tübingen (Germany).

According to the study's consortium agreement, participating sites contributed DNA and demographic/environmental data. DNAs (25µl of DNA at a concentration of 50 to 100 ng/µl) were shipped for quality control to University of Tübingen (Germany) and genotyped in a central

laboratory in Munich (Institute of Human Genetics, Helmholtz Zentrum, Germany). The samples from two sites (Gasser, Morris/Wood) were genotyped at the Laboratory of Neurogenetics (National Institute on Aging, National Institutes of Health, Bethesda, MD, USA). Demographic data were harmonized and collected using a standardized form and cleaned at Inserm U1018 (Villejuif, France).

### *Genotyping*

The Neurochip chip was used to genotype all the samples [4]. Briefly, this chip is a custom-designed array containing a tagging variant backbone with good genome-wide resolution of about 306,670, complemented with a manually curated custom content comprised of 179,467 variants implicated in diverse neurological diseases, including PD.

Genotyping was performed with an automated protocol according to the manufacturer's instructions (Illumina, San Diego, CA, USA). All arrays were scanned with an Illumina iScan and raw data were analyzed with the Illumina Beeline and GenomeStudio software packages using the manifest file `Neuro_Consortium_20013217_A1.bpm`. Clustering was performed in GenomeStudio with the GenTrain cluster 2.0 algorithm. Genotypes were post-processed with zCall (DOI: 10.1093/bioinformatics/bts479) to improve detection of rare alleles.

### *Quality control*

Genotyped data exported from Genome Studio to PLINK format were used for quality control and downstream analysis. The pooled dataset from the 35 sites consists of 27,538 subjects. Phenotypic data were missing for 245 subjects and three sites were removed as they only included cases, leaving 26,535 subjects (14,859 cases, 11,431 controls) for quality control using

“COMRARE” an automated pipeline under development at the University of Tübingen. The pipeline uses PLINK (<https://www.cog-genomics.org/plink>) and R scripts (R Foundation for Statistical Computing, Vienna, Austria) and the following steps were implemented separately for each site:

*1- Per individual quality control:*

- Identification of individuals with elevated missing genotyping rates or outlying heterozygosity rate: individuals with a genotype failure rate  $\geq 4\%$  or heterozygosity rate  $\pm 4$  standard deviations from the mean were excluded.
- Identification of Individuals with discordant sex information: the homozygosity rate was calculated for X-linked SNPs for each individual and compared to the expected rate. Participants for whom phenotypic and genotypic sex were discordant were removed.
- Identification of duplicated or related Individuals: pairs of individuals with an identity by descent (IBD) greater than 0.185 were removed.
- Eigensoft software was used to compute principal components in order to correct for population stratification by merging our dataset with HapMap [5, 6]. A scatter plot of the first two principal components was used to identify outliers in each study.

*2- Per marker quality control:*

- Identification of markers with high missing data rate: a call-rate threshold of 4% was used and SNPs with a lower rate were removed.
- SNPs with a significant ( $p < 10^{-5}$ ) difference in rates of missing values between cases and controls were removed.

- We excluded variants with a minor allele frequency (MAF)  $<5 \times 10^{-8}$  and those in Hardy-Weinberg disequilibrium ( $p < 5 \times 10^{-8}$ ).

### *Imputation*

After QC, we used the HRC/1000G imputation preparation and checking tool (<https://www.well.ox.ac.uk/~wrayner/tools/HRC-1000G-check-bim-v4.3.0.zip>) to check for Ref/Alt allele assignments, incorrect strands, deviation from allele frequency, and palindromic SNPs. Imputation of autosomal variants was performed separately for each dataset based on based on 271,398 to 373,664 SNPs in each study, through the Michigan Imputation server using the HRC reference panel and the GRCh37/hg19 assembly with a  $R^2$  filter of 0.3. The mean of the number of SNPs available in each study after imputation was 13,710,549 (SD=2,986,478).

### *Association analysis and meta-analysis*

We excluded from our analyses samples overlapping with the international Parkinson Disease Genomics Consortium (iPDGC) which included all the samples from three sites (Pastor/Diez-Fairen, Spain; Toft, Norway; Morris/Wood, UK) as well as 1,000 samples from the Gasser/Sharma (Germany) site (642 cases, 358 controls) and 137 samples of PD cases from the Tolosa site (Spain). Analyses are also restricted to sites that provided samples for both cases and controls and to participants of Caucasian ancestry; only sites with at least 50 cases or 50 controls were included. In addition, as the role of environmental factors may be different in carriers of Mendelian PD mutations, we excluded participants with GBA/LRRK2 mutations or positive family history of PD. The main characteristics of 7,369 cases and 7,018 controls from 23 sites included in the analyses are shown in Supplementary Table 1.

We excluded SNPs with a MAF <1%, in Hardy-Weinberg disequilibrium ( $P < 5 \times 10^{-8}$ ), and those with low imputation quality ( $r^2 < 0.8$ ). The final number of SNPs available for analysis in each study was comprised between 5,934,239 and 7,168,307. Only SNPs available in 75% ( $n=17$ ) of the studies or more were retained for further analyses.

For our MR analyses, we selected a total of 411 SNPs, of which 6 were not available and 37 excluded (Supplementary Table 5). Therefore, the final number of SNPs used in the analyses was of 368 SNPs, of which 93% were available in all studies. Of these SNPs, 27 were genotyped and 341 were imputed; when genotyped SNPs were available, we selected them in priority.

For each site, logistic regression adjusted for sex and the first four principal components was performed for each SNP under an additive genetic model (number of alleles for genotyped SNPs, dosage for imputed SNPs) using PLINK software (version 1.9) [7].

Summary statistics from the GWAS of the 23 studies were meta-analysed using the GWAMA software [8]. To assess heterogeneity of genetic associations with each SNP in Courage-PD, we used the  $I^2$  statistic;  $I^2$  values of 0 to 24% suggest little heterogeneity, 25 to 49% reflect moderate heterogeneity, 50 to 74% reflect large heterogeneity, and >75% reflect very large heterogeneity. Effects size and standard errors of SNPs with little heterogeneity across studies ( $I^2 \leq 25\%$ ) were combined using a fixed-effect model, while we used a random-effects model for SNPs with higher heterogeneity ( $I^2 > 25\%$ ). Of 368 SNPs used in our MR analyses, 324 (88%) displayed little heterogeneity and 44 (12%) had moderate heterogeneity; there were no SNPs with  $I^2$  above 50%.

Analyses were first performed overall. We then repeated our analyses: (i) in two groups defined by median age at study ( $\leq 67$  years, >67 years; 6,086 cases and 5,672 controls from 19 studies); (ii) in two groups defined by median disease duration in PD cases ( $\leq 7$  years,  $N=3,633$ ; >7 years,  $N=3,271$ ) from 22 studies (cases from each group were compared to all controls).

## REFERENCES

- [1] Gelb DJ, Oliver E, Gilman S (1999) Diagnostic criteria for Parkinson disease. *Arch Neurol* **56**, 33-39.
- [2] Gibb WR, Lees AJ (1988) The relevance of the Lewy body to the pathogenesis of idiopathic Parkinson's disease. *J Neurol Neurosurg Psychiatry* **51**, 745-752.
- [3] Bower JH, Maraganore DM, McDonnell SK, Rocca WA (1999) Incidence and distribution of parkinsonism in Olmsted County, Minnesota, 1976-1990. *Neurology* **52**, 1214-1220.
- [4] Blauwendraat C, Faghri F, Pihlstrom L, Geiger JT, Elbaz A, Lesage S, Corvol JC, May P, Nicolas A, Abramzon Y, Murphy NA, Gibbs JR, Ryten M, Ferrari R, Bras J, Guerreiro R, Williams J, Sims R, Lubbe S, Hernandez DG, Mok KY, Robak L, Campbell RH, Rogaeva E, Traynor BJ, Chia R, Chung SJ, Hardy JA, Brice A, Wood NW, Houlden H, Shulman JM, Morris HR, Gasser T, Krüger R, Heutink P, Sharma M, Simón-Sánchez J, Nalls MA, Singleton AB, Scholz SW (2017) NeuroChip, an updated version of the NeuroX genotyping platform to rapidly screen for variants associated with neurological diseases. *Neurobiol Aging* **57**, 247.e249-247.e213.
- [5] Price AL, Patterson NJ, Plenge RM, Weinblatt ME, Shadick NA, Reich D (2006) Principal components analysis corrects for stratification in genome-wide association studies. *Nat Genet* **38**, 904-909.
- [6] Patterson N, Price AL, Reich D (2006) Population structure and eigenanalysis. *PLoS Genetics* **2**, e190.

- [7] Purcell S, Neale B, Todd-Brown K, Thomas L, Ferreira MA, Bender D, Maller J, Sklar P, de Bakker PI, Daly MJ, Sham PC (2007) PLINK: a tool set for whole-genome association and population-based linkage analyses. *Am J Hum Genet* **81**, 559-575.
- [8] Magi R, Morris AP (2010) GWAMA: software for genome-wide association meta-analysis. *BMC Bioinformatics* **11**, 288.

**Supplementary Table 1.** Characteristics of cases and controls from the Courage-PD consortium by study site (after quality control).

| Continent     | Principal investigators             | Country       | Status   | N    | Sex (%) |        | Age at study |      |      | Age at PD onset |      |      | Age at PD diagnosis |      |      | Disease duration <sup>b</sup> |    |
|---------------|-------------------------------------|---------------|----------|------|---------|--------|--------------|------|------|-----------------|------|------|---------------------|------|------|-------------------------------|----|
|               |                                     |               |          |      | Male    | Female | Mean         | SD   | MD   | Mean            | SD   | MD   | Mean                | SD   | MD   | Mean                          | SD |
| Africa        | Bardien/Carr <sup>a</sup>           | South Africa  | Cases    | 117  | 59.8    | 40.2   | 68.2         | 11.2 | 59.6 | 12.6            | 59.6 | 12.6 | 59.6                | 12.6 | 8.5  | 6.7                           |    |
|               |                                     |               | Controls | 80   | 57.5    | 42.5   | 50.8         | 12.6 | -    | -               | -    | -    | -                   | -    | -    | -                             | -  |
| North America | Farrer <sup>a</sup>                 | United States | Cases    | 262  | 66.4    | 33.6   | 66.9         | 10.4 | 55.8 | 11.5            | 1    | 58.6 | 11.5                | 96   | 11.0 | 6.5                           |    |
|               |                                     |               | Controls | 394  | 31.0    | 69.0   | 69.4         | 12.2 | -    | -               | -    | -    | -                   | -    | -    | -                             | -  |
|               | Rogaeva/Lang <sup>a</sup>           | Canada        | Cases    | 159  | 66.0    | 34.0   | 62.6         | 13.0 | 52.8 | 12.8            | 5    | 52.8 | 12.8                | 159  | 9.8  | 5.9                           |    |
|               |                                     |               | Controls | 149  | 38.9    | 61.1   | 74.0         | 8.6  | -    | -               | -    | -    | -                   | -    | -    | -                             | -  |
| Australia     | Mellick <sup>a</sup>                | Australia     | Cases    | 399  | 64.9    | 35.1   | 68.2         | 9.3  | 59.1 | 11.5            | 60.7 | 10.8 | 8                   | 9.2  | 7.1  |                               |    |
|               |                                     |               | Controls | 399  | 48.4    | 51.6   | 67.7         | 9.0  | -    | -               | -    | -    | -                   | -    | -    | -                             |    |
| Europe        | Aasly <sup>a</sup>                  | Norway        | Cases    | 463  | 59.6    | 40.4   | 78.2         | 11.2 | 61.1 | 10.8            | 463  | 17.1 | 5.4                 |      |      |                               |    |
|               |                                     |               | Controls | 487  | 54.2    | 45.8   | 73.2         | 14.1 | 74   | -               | -    | -    | -                   | -    | -    |                               |    |
|               | Annesi <sup>a</sup>                 | Italy         | Cases    | 89   | 65.2    | 34.8   | 66.8         | 9.0  | 59.6 | 10.1            | 66.8 | 9.0  | 7.2                 | 5.6  |      |                               |    |
|               |                                     |               | Controls | 93   | 46.2    | 53.8   | 58.6         | 20.1 | -    | -               | -    | -    | -                   | -    | -    |                               |    |
|               | Brice/Corvol/Lesage <sup>a</sup>    | France        | Cases    | 745  | 59.6    | 40.4   | 61.1         | 10.8 | 52.1 | 11.0            | 25   | 745  | 8.9                 | 6.3  |      |                               |    |
|               |                                     |               | Controls | 275  | 56.4    | 43.6   | 62.4         | 10.6 | -    | -               | -    | -    | -                   | -    | -    |                               |    |
|               | Carmine Belin/Ran <sup>a</sup>      | Sweden        | Cases    | 214  | 63.6    | 36.4   | 67.2         | 10.3 | 58.6 | 11.0            | 214  | 8.6  | 6.2                 |      |      |                               |    |
|               |                                     |               | Controls | 611  | 54.8    | 45.2   | 66.3         | 9.8  | 583  | -               | -    | -    | -                   | -    |      |                               |    |
|               | Chartier-Harlin/Muttez <sup>a</sup> | France        | Cases    | 285  | 55.8    | 44.2   | 64.3         | 9.0  | 52.3 | 10.3            | 53.3 | 10.1 | 12                  | 5.9  |      |                               |    |
|               |                                     |               | Controls | 217  | 38.7    | 61.3   | 59.8         | 12.5 | -    | -               | -    | -    | -                   | -    | -    |                               |    |
|               | Deutschländer <sup>a</sup>          | Germany       | Cases    | 264  | 61.7    | 38.3   | 69.6         | 9.9  | 60.7 | 11.4            | 59.6 | 10.7 | 199                 | 8.9  | 6.6  |                               |    |
|               |                                     |               | Controls | 40   | 32.5    | 67.5   | 66.3         | 10.2 | -    | -               | -    | -    | -                   | -    | -    |                               |    |
|               | Elbaz <sup>a</sup>                  | France        | Cases    | 387  | 60.5    | 39.5   | 70.1         | 7.3  | 65   | 7.6             | 65.9 | 7.4  | 1                   | 5.2  | 4.1  |                               |    |
|               |                                     |               | Controls | 998  | 59.0    | 41.0   | 69.8         | 7.6  | -    | -               | -    | -    | -                   | -    | -    |                               |    |
|               | Ferreira                            | Portugal      | Cases    | 313  | 58.5    | 41.5   | 69.1         | 10.1 | 58.5 | 11.7            | 60.2 | 11.8 | 10.6                | 7.2  |      |                               |    |
|               |                                     |               | Controls | 53   | 26.4    | 73.6   | 46.9         | 18.7 | -    | -               | -    | -    | -                   | -    | -    |                               |    |
|               | Gasser/Sharma <sup>c</sup>          | Germany       | Cases    | 432  | 65.0    | 35.0   | 65.8         | 10.8 | 60.4 | 11.2            | 60.4 | 11.2 | 129                 | 5.3  | 5.1  |                               |    |
|               |                                     |               | Controls | 388  | 43.0    | 57.0   | 62.9         | 7.3  | -    | -               | -    | -    | -                   | -    | -    |                               |    |
|               | Duga/Cilia <sup>a</sup>             | Italy         | Cases    | 1340 | 59.3    | 40.7   | 65.9         | 10.9 | 59.1 | 11.3            | 60.7 | 11.1 | 6.8                 | 5.6  |      |                               |    |
|               |                                     |               | Controls | 1328 | 34.3    | 65.7   | 61.9         | 10.9 | -    | -               | -    | -    | -                   | -    | -    |                               |    |
|               | Hadjigeorgiou <sup>a</sup>          | Greece        | Cases    | 256  | 48.4    | 51.6   | 67.6         | 10.4 | 62.8 | 10.3            | 63.7 | 10.4 | 4.8                 | 4.4  |      |                               |    |
|               |                                     |               | Controls | 310  | 47.4    | 52.6   | 69.8         | 8.7  | -    | -               | -    | -    | -                   | -    | -    |                               |    |
|               | Koks/Taba <sup>a</sup>              | Estonia       | Cases    | 210  | 40.0    | 60.0   | 73.0         | 8.2  | 66.7 | 9.8             | 210  | 6.3  | 5.4                 |      |      |                               |    |
|               |                                     |               | Controls | 163  | 41.1    | 58.9   | 72.6         | 10.1 | -    | -               | -    | -    | -                   | -    |      |                               |    |



| Principal<br>Continent<br>investigators | Country    | Status          | N            | Sex (%) |        | Age at study |      |     | Age at PD onset |      |    | Age at PD diagnosis |      |      | Disease<br>duration <sup>b</sup> |     |
|-----------------------------------------|------------|-----------------|--------------|---------|--------|--------------|------|-----|-----------------|------|----|---------------------|------|------|----------------------------------|-----|
|                                         |            |                 |              | Male    | Female | Mean         | SD   | MD  | Mean            | SD   | MD | Mean                | SD   | Mean | SD                               |     |
| Kruger <sup>a</sup>                     | Luxembourg | Cases           | 285          | 69.5    | 30.5   | 67.7         | 11.3 |     | 60.1            | 12.8 |    | 62.3                | 12.0 | 10   | 7.2                              | 6.2 |
|                                         |            | Controls        | 283          | 57.2    | 42.8   | 58.5         | 12.1 |     | -               | -    |    | -                   | -    | -    | -                                | -   |
| Puschmann <sup>a</sup>                  | Sweden     | Cases           | 50           | 70.0    | 30.0   | 69.0         | 10.4 |     | 61.5            | 11.3 |    | -                   | -    | 49   | 7.4                              | 4.8 |
|                                         |            | Controls        | 105          | 29.5    | 70.5   | 66.7         | 8.9  |     | -               | -    |    | -                   | -    | -    | -                                | -   |
| Stefanis/Simitsis <sup>a</sup>          | Greece     | Cases           | 174          | 62.1    | 37.9   | 67.7         | 13.3 |     | 61.5            | 13.6 |    | 61.9                | 12.7 | 44   | 6.2                              | 6.3 |
|                                         |            | Controls        | 178          | 36.0    | 64.0   | 67.0         | 9.6  |     | -               | -    |    | -                   | -    | -    | -                                | -   |
| Tolosa <sup>d</sup>                     | Spain      | Cases           | 141          | 62.4    | 37.6   | 67.4         | 10.3 |     | 60.4            | 11.1 |    | -                   | -    | 141  | 7.0                              | 5.9 |
|                                         |            | Controls        | 66           | 16.7    | 83.3   | 61.9         | 12.1 | 8   | -               | -    |    | -                   | -    | -    | -                                | -   |
| Valente                                 | Italy      | Cases           | 223          | 60.1    | 39.9   | 67.1         | 12.7 | 4   | 54.3            | 10.8 | 4  | 59.1                | 7.8  | 144  | 12.7                             | 8.2 |
|                                         |            | Controls        | 54           | 38.9    | 61.1   | 78.4         | 9.6  |     | -               | -    |    | -                   | -    | -    | -                                | -   |
| Wirdefeldt <sup>a</sup>                 | Sweden     | Cases           | 61           | 55.7    | 44.3   | 75.9         | 8.1  |     | 66.8            | 9.9  |    | -                   | -    | 61   | 8.6                              | 5.6 |
|                                         |            | Controls        | 165          | 46.1    | 53.9   | 73.9         | 9.6  |     | -               | -    |    | -                   | -    | -    | -                                | -   |
| Zimprich                                | Austria    | Cases           | 500          | 63.0    | 37.0   |              |      | 500 | 59.1            | 11.2 |    | -                   | -    | 500  | -                                | -   |
|                                         |            | Controls        | 182          | 40.1    | 59.9   |              |      | 182 | -               | -    |    | -                   | -    | -    | -                                | -   |
| <b>Total</b>                            |            | <b>Cases</b>    | <b>7,369</b> |         |        |              |      |     |                 |      |    |                     |      |      |                                  |     |
|                                         |            | <b>Controls</b> | <b>7,018</b> |         |        |              |      |     |                 |      |    |                     |      |      |                                  |     |

MD, missing data; SD, standard deviation.

<sup>a</sup> Sites from the Geo-PD consortium.

<sup>b</sup> Duration disease = age at study - age at PD onset. Missing values are the same as those for age at study.

<sup>c</sup> For the Gasser/Sharma site, we excluded 1,000 samples overlapping with iPDGC (642 cases, 358 controls).

<sup>d</sup> For the Tolosa site, we excluded 137 samples of PD cases overlapping with iPDGC.

**Supplementary Table 2.** Statistical power to detect odds ratios comprised between 0.3 and 0.9 for two values of type-1 error in Mendelian randomization analyses in the Courage-PD consortium (7,369 cases, 7,018 controls).

| Exposure               | R <sup>2</sup> | Type-1 error=1.7%<br>Odds ratio |             |             |             |             |      |      |             | Type-1 error=5%<br>Odds ratio |             |             |             |             |      |      |  |
|------------------------|----------------|---------------------------------|-------------|-------------|-------------|-------------|------|------|-------------|-------------------------------|-------------|-------------|-------------|-------------|------|------|--|
|                        |                | 0.30                            | 0.40        | 0.50        | 0.60        | 0.70        | 0.80 | 0.90 | 0.30        | 0.40                          | 0.50        | 0.60        | 0.70        | 0.80        | 0.90 |      |  |
| Smoking initiation     | 2.95%          | <b>1.00</b>                     | <b>1.00</b> | <b>1.00</b> | <b>1.00</b> | <b>0.91</b> | 0.47 | 0.10 | <b>1.00</b> | <b>1.00</b>                   | <b>1.00</b> | <b>1.00</b> | <b>1.00</b> | <b>0.96</b> | 0.64 | 0.19 |  |
| Lifetime smoking index | 0.49%          | <b>1.00</b>                     | <b>0.95</b> | 0.73        | 0.42        | 0.19        | 0.07 | 0.03 | <b>1.00</b> | <b>0.98</b>                   | <b>0.85</b> | 0.59        | 0.33        | 0.16        | 0.07 |      |  |
| Alcohol drinking       | 0.48%          | <b>1.00</b>                     | <b>0.94</b> | 0.72        | 0.41        | 0.19        | 0.07 | 0.03 | <b>1.00</b> | <b>0.98</b>                   | <b>0.84</b> | 0.58        | 0.32        | 0.15        | 0.07 |      |  |
| Coffee drinking        | 0.21%          | <b>0.88</b>                     | 0.60        | 0.33        | 0.17        | 0.08        | 0.04 | 0.02 | <b>0.95</b> | 0.75                          | 0.50        | 0.30        | 0.17        | 0.09        | 0.06 |      |  |

R<sup>2</sup> is the sum of the proportion of the variance of the exposure explained by each individual genetic variants (Supplementary Table 3).  
 Bold values are  $\geq 0.80$ .

Statistical power was computed according to Brion MJ et al. (Int J Epidemiol 2013;42:1497-1501).

**Supplementary Table 3.** SNPs used for Mendelian randomization analyses: individual associations with exposures and PD.

| SNP                                                                | Chr:Pos (GRCh37) | EA/BA | Exposure |       |       |            | Courage-PD |           |                  |                 | R <sup>2</sup> |                 |      |          |          |          |
|--------------------------------------------------------------------|------------------|-------|----------|-------|-------|------------|------------|-----------|------------------|-----------------|----------------|-----------------|------|----------|----------|----------|
|                                                                    |                  |       | EA/BA    | EAF   | Beta  | SE         | p          | N studies | N samples        | EAF             |                | Beta            | SE   | p        | P (%)    |          |
| <b>Alcohol drinking (per 1-SD increase of ln(drinks per week))</b> |                  |       |          |       |       |            |            |           |                  |                 |                |                 |      |          |          |          |
| rs705687                                                           | 1:4548453        | G/A   | 0.22     | 0.011 | 0.002 | 8.15E-10   | 23         | 14387     | 0.79             | 0.031           | 0.032          | 3.28E-01        | 0    | 4.01E-05 |          |          |
| rs58107686                                                         | 1:33837334       | A/C   | 0.67     | 0.010 | 0.002 | 7.79E-10   | 23         | 14387     | 0.34             | 0.020           | 0.027          | 4.59E-01        | 11.1 | 4.19E-05 |          |          |
| rs12088813                                                         | 1:66407700       | C/A   | 0.73     | 0.009 | 0.002 | 1.58E-08   | 23         | 14387     | 0.26             | 0.044           | 0.029          | 1.26E-01        | 0    | 3.41E-05 |          |          |
| rs5024204                                                          | 1:71491890       | A/T   | 0.28     | 0.010 | 0.002 | 2.55E-09   | 23         | 14387     | 0.28             | 0.045           | 0.028          | 1.16E-01        | 0    | 3.78E-05 |          |          |
| rs10753661                                                         | 1:165119792      | A/G   | 0.32     | 0.009 | 0.002 | 3.76E-08   | 23         | 14387     | 0.68             | 0.033           | 0.028          | 2.40E-01        | 0    | 3.23E-05 |          |          |
| rs28680958                                                         | 1:173848808      | A/G   | 0.78     | 0.011 | 0.002 | 5.13E-10   | 23         | 14387     | 0.22             | 0.004           | 0.031          | 8.96E-01        | 0    | 4.11E-05 |          |          |
| rs823114                                                           | 1:205719532      | G/A   | 0.55     | 0.009 | 0.001 | 2.31E-09   | 23         | 14387     | 0.42             | -0.032          | 0.026          | 2.22E-01        | 0    | 3.80E-05 |          |          |
| rs77165542                                                         | 2:430975         | T/C   | 0.97     | 0.026 | 0.004 | 5.63E-11   | 3          | 1179      | Excluded for MR  |                 |                |                 |      | 0        | 2.09E-04 |          |
| rs1260326 <sup>b</sup>                                             | 2:27730940       | T/C   | 0.60     | 0.021 | 0.001 | 8.05E-45   | 23         | 14387     | 0.46             | <b>-0.069</b>   | <b>0.026</b>   | <b>8.41E-03</b> | 0    | 2.09E-04 |          |          |
| rs13383034                                                         | 2:45155276       | C/T   | 0.33     | 0.015 | 0.002 | 6.31E-22   | 23         | 14387     | 0.68             | -0.061          | 0.035          | 8.17E-02        | 28.4 | 9.84E-05 |          |          |
| rs13032049                                                         | 2:63581507       | A/G   | 0.28     | 0.010 | 0.002 | 3.00E-10   | 23         | 14387     | 0.70             | 0.055           | 0.038          | 1.47E-01        | 32.8 | 4.22E-05 |          |          |
| rs828867                                                           | 2:74334462       | G/A   | 0.54     | 0.009 | 0.001 | 2.15E-09   | 16         | 9769      | Excluded for MR  |                 |                |                 |      | 0        | 4.52E-05 |          |
| rs11692435                                                         | 2:98275354       | G/A   | 0.09     | 0.017 | 0.003 | 2.53E-11   | 23         | 14387     | NA in COURAGE-PD |                 |                |                 |      | 14.9     | 5.51E-05 |          |
| rs13024996                                                         | 2:144225215      | A/C   | 0.64     | 0.011 | 0.002 | 5.72E-13   | 23         | 14387     | 0.37             | 0.009           | 0.027          | 7.43E-01        | 0    | 3.65E-05 |          |          |
| rs72859280                                                         | 2:147956293      | G/T   | 0.04     | 0.023 | 0.004 | 4.44E-09   | 20         | 11260     | 0.96             | -0.131          | 0.081          | 1.06E-01        | 0    | 4.35E-05 |          |          |
| rs56337305                                                         | 2:225475560      | C/T   | 0.62     | 0.010 | 0.001 | 1.63E-10   | 23         | 14387     | 0.38             | -0.014          | 0.026          | 5.83E-01        | 24.8 | 4.47E-05 |          |          |
| rs13094887                                                         | 3:70968431       | T/A   | 0.70     | 0.010 | 0.002 | 8.57E-11   | 23         | 14387     | 0.69             | -0.037          | 0.028          | 1.77E-01        | 0    | 9.77E-05 |          |          |
| rs62250685                                                         | 3:85457240       | G/A   | 0.39     | 0.014 | 0.002 | 1.05E-21   | 23         | 14387     | 0.61             | -0.017          | 0.026          | 5.09E-01        | 0    | 3.28E-05 |          |          |
| rs9838144                                                          | 3:131576287      | C/G   | 0.79     | 0.010 | 0.002 | 2.65E-08   | 23         | 14387     | 0.80             | -0.050          | 0.032          | 1.26E-01        | 15.8 | 3.55E-05 |          |          |
| rs2011092                                                          | 3:141124607      | C/T   | 0.66     | 0.009 | 0.002 | 7.35E-09   | 23         | 14387     | 0.30             | -0.006          | 0.028          | 8.19E-01        | 0    | 3.19E-05 |          |          |
| rs6787172                                                          | 3:158187811      | G/T   | 0.45     | 0.008 | 0.001 | 4.27E-08   | 23         | 14387     | 0.54             | 0.022           | 0.025          | 3.77E-01        | 0    | 3.38E-05 |          |          |
| rs3748034                                                          | 4:34446091       | T/G   | 0.86     | 0.012 | 0.002 | 1.67E-08   | 23         | 14387     | 0.14             | -0.009          | 0.037          | 8.16E-01        | 23.3 | 3.24E-04 |          |          |
| rs11940694 <sup>a</sup>                                            | 4:39414993       | A/G   | 0.60     | 0.026 | 0.001 | 3.03E-68   | 23         | 14387     | 0.43             | -0.031          | 0.028          | 2.70E-01        | 6.3  | 4.11E-05 |          |          |
| rs4501255                                                          | 4:42151306       | C/G   | 0.23     | 0.011 | 0.002 | 4.83E-10   | 23         | 14387     | 0.23             | -0.030          | 0.031          | 3.30E-01        | 0    | 1.61E-03 |          |          |
| rs1229984 <sup>a</sup>                                             | 4:100239319      | T/C   | 0.96     | 0.151 | 0.004 | <1.00E-300 | 21         | 14004     | 0.06             | -0.011          | 0.055          | 8.49E-01        | 0    | 1.01E-04 |          |          |
| rs2165670                                                          | 4:100286085      | G/A   | 0.11     | 0.023 | 0.002 | 1.67E-22   | 22         | 14205     | 0.91             | 0.047           | 0.061          | 4.37E-01        | 36.6 | 1.01E-04 |          |          |
| rs13107325 <sup>a</sup>                                            | 4:103188709      | T/C   | 0.93     | 0.028 | 0.003 | 1.53E-22   | 23         | 14387     | 0.07             | <b>-0.104</b>   | <b>0.051</b>   | <b>4.04E-02</b> | 0    | 4.74E-05 |          |          |
| rs4690727                                                          | 4:143648579      | C/G   | 0.72     | 0.011 | 0.002 | 2.43E-11   | 23         | 14387     | 0.70             | -0.009          | 0.028          | 7.63E-01        | 0    | 4.81E-05 |          |          |
| rs12651313                                                         | 4:171086393      | G/C   | 0.56     | 0.009 | 0.001 | 3.79E-09   | 23         | 14387     | 0.56             | Excluded for MR |                |                 |      |          | 0        | 3.44E-05 |
| rs4916723                                                          | 5:87854395       | C/A   | 0.58     | 0.010 | 0.001 | 1.72E-11   | 23         | 14387     | 0.40             | -0.044          | 0.027          | 1.06E-01        | 0    | 3.58E-05 |          |          |
| rs12655091                                                         | 5:144412335      | A/G   | 0.47     | 0.008 | 0.001 | 1.25E-08   | 23         | 14387     | 0.52             | -0.021          | 0.026          | 4.13E-01        | 6.1  | 4.45E-05 |          |          |
| rs55872084                                                         | 5:155902003      | G/T   | 0.23     | 0.010 | 0.002 | 6.32E-09   | 23         | 14387     | 0.78             | 0.012           | 0.031          | 7.03E-01        | 0    | 3.93E-05 |          |          |
| rs6460047                                                          | 7:73042443       | T/C   | 0.21     | 0.012 | 0.002 | 9.69E-11   | 23         | 14387     | 0.81             | -0.021          | 0.041          | 6.08E-01        | 26.8 | 3.27E-05 |          |          |
| rs10236149                                                         | 7:98977515       | G/A   | 0.88     | 0.013 | 0.002 | 1.18E-09   | 23         | 14387     | 0.13             | 0.032           | 0.038          | 4.00E-01        | 9.7  | 8.68E-05 |          |          |
| rs35034355                                                         | 7:103840115      | A/G   | 0.48     | 0.008 | 0.001 | 2.87E-08   | 23         | 14387     | 0.49             | -0.013          | 0.026          | 6.24E-01        | 0    | 3.17E-05 |          |          |
| rs6951574                                                          | 7:153489744      | T/C   | 0.46     | 0.013 | 0.001 | 1.58E-19   | 23         | 14387     | 0.53             | 0.010           | 0.026          | 6.99E-01        | 0    | 4.52E-05 |          |          |
| rs13250583                                                         | 8:20949917       | T/C   | 0.79     | 0.010 | 0.002 | 4.70E-08   | 23         | 14387     | 0.20             | -0.011          | 0.033          | 7.34E-01        | 15.1 | 3.50E-05 |          |          |
| rs1217091                                                          | 8:64527399       | T/C   | 0.81     | 0.012 | 0.002 | 7.05E-11   | 23         | 14387     | 0.20             | <b>0.073</b>    | <b>0.033</b>   | <b>2.53E-02</b> | 0    | 4.52E-05 |          |          |
| rs28601761                                                         | 8:126500031      | C/G   | 0.42     | 0.009 | 0.001 | 7.17E-10   | 23         | 14387     | 0.42             | Excluded for MR |                |                 |      |          | 0        | 3.50E-05 |
| rs55932213                                                         | 9:108755622      | A/G   | 0.74     | 0.009 | 0.002 | 9.55E-09   | 21         | 13853     | 0.30             | -0.019          | 0.030          | 5.29E-01        | 13.5 | 4.52E-05 |          |          |
| rs10978550 <sup>a</sup>                                            | 9:109345993      | C/T   | 0.79     | 0.012 | 0.002 | 7.15E-11   | 23         | 14387     | 0.20             | 0.014           | 0.032          | 6.64E-01        | 0    | 4.52E-05 |          |          |

| SNP                                           | Chr:Pos (GRCh37) | Exposure |      |       |       |           | Courage-PD |           |                  |               |              | R <sup>2</sup>  |      |                    |
|-----------------------------------------------|------------------|----------|------|-------|-------|-----------|------------|-----------|------------------|---------------|--------------|-----------------|------|--------------------|
|                                               |                  | E/A/BA   | EAF  | Beta  | SE    | p         | N studies  | N samples | EAF              | Beta          | SE           |                 | p    | I <sup>2</sup> (%) |
| rs7074871                                     | 10:110507806     | A/G      | 0.74 | 0.009 | 0.002 | 1.86E-08  | 23         | 14387     | 0.25             | 0.009         | 0.029        | 7.48E-01        | 0    | 3.36E-05           |
| rs17665139                                    | 10:125093880     | T/C      | 0.85 | 0.012 | 0.002 | 1.59E-08  | 23         | 14387     | 0.14             | -0.007        | 0.037        | 8.45E-01        | 14.3 | 3.39E-05           |
| rs7950166                                     | 11:8642218       | T/C      | 0.36 | 0.010 | 0.002 | 9.89E-11  | 23         | 14387     | 0.60             | -0.019        | 0.027        | 4.76E-01        | 13.6 | 4.44E-05           |
| rs11030084                                    | 11:27643725      | T/C      | 0.82 | 0.011 | 0.002 | 1.72E-08  | 23         | 14387     | 0.20             | -0.035        | 0.032        | 2.82E-01        | 0    | 3.38E-05           |
| rs56030824                                    | 11:47397353      | A/G      | 0.68 | 0.012 | 0.002 | 1.15E-13  | 23         | 14387     | 0.32             | 0.006         | 0.027        | 8.26E-01        | 24.9 | 5.88E-05           |
| rs10750025 <sup>a</sup>                       | 11:113424042     | C/T      | 0.69 | 0.010 | 0.002 | 4.89E-11  | 23         | 14387     | 0.34             | -0.004        | 0.027        | 8.85E-01        | 0    | 4.59E-05           |
| rs4938230                                     | 11:116075001     | C/A      | 0.84 | 0.013 | 0.002 | 1.48E-10  | 14         | 6683      | Excluded for MR  |               |              |                 |      |                    |
| rs682011 <sup>a</sup>                         | 11:121544285     | T/C      | 0.56 | 0.008 | 0.001 | 2.22E-08  | 23         | 14387     | 0.46             | -0.021        | 0.026        | 4.21E-01        | 0    | 3.33E-05           |
| rs12795042                                    | 11:133658168     | C/A      | 0.38 | 0.008 | 0.002 | 3.25E-08  | 23         | 14387     | 0.58             | -0.012        | 0.036        | 7.33E-01        | 31.3 | 3.25E-05           |
| rs3809162                                     | 12:54674235      | A/G      | 0.40 | 0.009 | 0.001 | 1.19E-09  | 23         | 14387     | 0.64             | -0.014        | 0.027        | 6.00E-01        | 8.5  | 3.93E-05           |
| rs10506274                                    | 12:81601464      | T/G      | 0.52 | 0.009 | 0.001 | 5.78E-10  | 23         | 14387     | 0.48             | 0.017         | 0.025        | 5.13E-01        | 19.7 | 4.08E-05           |
| rs4842786                                     | 12:92170791      | A/G      | 0.42 | 0.009 | 0.001 | 2.73E-09  | 23         | 14387     | 0.56             | 0.000         | 0.027        | 9.99E-01        | 22.8 | 3.76E-05           |
| rs500321                                      | 13:27124360      | T/A      | 0.26 | 0.010 | 0.002 | 4.92E-09  | 23         | 14387     | 0.28             | 0.009         | 0.029        | 7.70E-01        | 11.5 | 3.63E-05           |
| rs1123285                                     | 14:57274519      | G/C      | 0.66 | 0.009 | 0.002 | 8.14E-09  | 23         | 14387     | 0.66             | -0.041        | 0.027        | 1.35E-01        | 10.4 | 3.53E-05           |
| rs28929474                                    | 14:94844947      | T/C      | 0.98 | 0.037 | 0.005 | 1.34E-11  | 16         | 9567      | Excluded for MR  |               |              |                 |      |                    |
| rs2472297 <sup>a,b</sup>                      | 15:75027880      | C/T      | 0.25 | 0.011 | 0.002 | 3.10E-10  | 23         | 14387     | 0.81             | -0.032        | 0.033        | 3.30E-01        | 0    | 4.21E-05           |
| rs12907323                                    | 15:86796012      | A/G      | 0.41 | 0.008 | 0.001 | 9.93E-09  | 23         | 14387     | 0.56             | 0.010         | 0.026        | 7.11E-01        | 2    | 3.50E-05           |
| rs17177078 <sup>a</sup>                       | 16:24810681      | T/C      | 0.94 | 0.022 | 0.003 | 1.27E-13  | 23         | 14387     | 0.08             | -0.027        | 0.048        | 5.78E-01        | 0    | 5.84E-05           |
| rs378421                                      | 16:28754684      | A/G      | 0.60 | 0.011 | 0.001 | 4.83E-14  | 23         | 14387     | 0.38             | -0.030        | 0.027        | 2.56E-01        | 8.6  | 6.05E-05           |
| rs62044525                                    | 16:64872590      | G/C      | 0.82 | 0.012 | 0.002 | 1.03E-10  | 23         | 14387     | 0.82             | <b>0.079</b>  | <b>0.033</b> | <b>1.77E-02</b> | 0    | 4.45E-05           |
| rs1104608                                     | 16:73912588      | C/G      | 0.58 | 0.011 | 0.001 | 1.05E-13  | 11         | 5990      | Excluded for MR  |               |              |                 |      |                    |
| rs4548913                                     | 17:2209888       | A/G      | 0.37 | 0.008 | 0.002 | 3.11E-08  | 23         | 14387     | 0.60             | -0.014        | 0.027        | 5.91E-01        | 9.7  | 3.25E-05           |
| rs3803800 <sup>a</sup>                        | 17:7462969       | A/G      | 0.79 | 0.011 | 0.002 | 1.50E-10  | 23         | 14387     | 0.20             | 0.005         | 0.032        | 8.82E-01        | 0    | 4.36E-05           |
| rs2854334                                     | 17:29715500      | A/G      | 0.62 | 0.009 | 0.001 | 7.51E-10  | 20         | 13362     | 0.39             | 0.035         | 0.030        | 2.38E-01        | 0    | 4.03E-05           |
| rs10438820                                    | 17:78524597      | C/T      | 0.70 | 0.009 | 0.002 | 1.76E-08  | 23         | 14387     | 0.30             | 0.029         | 0.028        | 3.03E-01        | 6.3  | 3.37E-05           |
| rs9950000                                     | 18:53052169      | T/C      | 0.60 | 0.009 | 0.001 | 9.38E-10  | 23         | 14387     | 0.40             | -0.009        | 0.026        | 7.41E-01        | 0    | 3.97E-05           |
| rs4092465                                     | 18:55080437      | G/A      | 0.36 | 0.008 | 0.002 | 4.39E-08  |            |           | NA in COURAGE-PD |               |              |                 |      |                    |
| rs281379                                      | 19:49214274      | G/A      | 0.51 | 0.014 | 0.001 | 4.91E-21  | 23         | 14387     | 0.54             | 0.016         | 0.026        | 5.43E-01        | 0    | 9.41E-05           |
| rs4815364                                     | 20:25035711      | G/A      | 0.62 | 0.009 | 0.001 | 1.02E-08  | 23         | 14387     | 0.37             | 0.044         | 0.027        | 1.04E-01        | 6.3  | 3.48E-05           |
| rs9607814                                     | 22:41946519      | A/C      | 0.80 | 0.010 | 0.002 | 4.31E-08  | 23         | 14387     | 0.21             | <b>-0.121</b> | <b>0.032</b> | <b>1.83E-04</b> | 4.2  | 3.32E-05           |
| <b>Coffee drinking (per ln(cups per day))</b> |                  |          |      |       |       |           |            |           |                  |               |              |                 |      |                    |
| rs574367                                      | 1:177873210      | T/G      | 0.21 | 0.010 | 0.002 | 8.06E-09  | 23         | 14387     | 0.18             | <b>-0.139</b> | <b>0.051</b> | <b>6.63E-03</b> | 47   | 3.32E-05           |
| rs10865548                                    | 2:631606         | G/A      | 0.83 | 0.015 | 0.002 | 4.46E-15  | 23         | 14387     | 0.80             | 0.014         | 0.033        | 6.77E-01        | 10.4 | 6.35E-05           |
| rs1260326 <sup>b</sup>                        | 2:27730940       | C/T      | 0.61 | 0.014 | 0.002 | 2.62E-19  | 23         | 14387     | 0.54             | <b>0.069</b>  | <b>0.026</b> | <b>8.41E-03</b> | 0    | 9.33E-05           |
| rs4410790                                     | 7:17284577       | C/T      | 0.63 | 0.039 | 0.002 | 5.59E-141 | 23         | 14387     | 0.61             | -0.009        | 0.027        | 7.22E-01        | 3.6  | 7.09E-04           |
| rs34060476                                    | 7:73037956       | G/A      | 0.13 | 0.019 | 0.002 | 5.06E-18  | 23         | 14387     | 0.11             | 0.045         | 0.041        | 2.72E-01        | 15.6 | 8.17E-05           |
| rs1057868                                     | 7:75615006       | T/C      | 0.29 | 0.020 | 0.002 | 5.26E-33  | 23         | 14387     | 0.28             | 0.041         | 0.028        | 1.48E-01        | 0    | 1.65E-04           |
| rs597045                                      | 11:56272114      | A/T      | 0.70 | 0.011 | 0.002 | 6.62E-11  | 23         | 14387     | 0.70             | -0.035        | 0.037        | 3.42E-01        | 33.2 | 5.08E-05           |
| rs1956218                                     | 14:33075243      | G/A      | 0.56 | 0.008 | 0.002 | 3.62E-08  | 23         | 14387     | 0.53             | -0.027        | 0.026        | 2.96E-01        | 0    | 3.15E-05           |
| rs2472297 <sup>a,b</sup>                      | 15:75027880      | T/C      | 0.26 | 0.044 | 0.002 | 5.19E-155 | 23         | 14387     | 0.19             | 0.032         | 0.033        | 3.30E-01        | 0    | 7.45E-04           |
| rs66723169                                    | 18:57808978      | A/C      | 0.23 | 0.015 | 0.002 | 9.88E-17  | 23         | 14387     | 0.23             | -0.019        | 0.031        | 5.47E-01        | 9.5  | 7.97E-05           |
| rs2330783                                     | 22:24747031      | G/T      | 0.99 | 0.044 | 0.006 | 1.57E-12  | 18         | 11562     | 0.98             | 0.168         | 0.119        | 1.57E-01        | 4.6  | 3.83E-05           |

| SNP                           | Chr:Pos (GRCh37) | E/A/BA | Exposure |       |       | p        | N studies | N samples | Courage-PD |               |                 | R <sup>2</sup>  |      |                    |
|-------------------------------|------------------|--------|----------|-------|-------|----------|-----------|-----------|------------|---------------|-----------------|-----------------|------|--------------------|
|                               |                  |        | EAF      | Beta  | SE    |          |           |           | EAF        | Beta          | SE              |                 | p    | I <sup>2</sup> (%) |
| <b>Lifetime smoking index</b> |                  |        |          |       |       |          |           |           |            |               |                 |                 |      |                    |
| rs1193237                     | 1:7526486        | C/G    | 0.56     | 0.008 | 0.001 | 2.80E-08 | 23        | 14387     | 0.57       |               | Excluded for MR |                 |      |                    |
| rs4949465                     | 1:32178489       | C/T    | 0.13     | 0.012 | 0.002 | 1.70E-08 | 23        | 14387     | 0.12       | 0.002         | 0.040           | 9.59E-01        | 0    | 3.06E-05           |
| rs549845                      | 1:44076469       | G/A    | 0.30     | 0.011 | 0.002 | 8.30E-14 | 23        | 14387     | 0.33       | -0.054        | 0.028           | 5.20E-02        | 23.8 | 5.34E-05           |
| rs1933270                     | 1:49977965       | T/G    | 0.36     | 0.009 | 0.001 | 1.50E-10 | 23        | 14387     | 0.37       | <b>0.057</b>  | <b>0.027</b>    | <b>3.23E-02</b> | 0    | 3.93E-05           |
| rs7528604                     | 1:66407352       | G/A    | 0.57     | 0.010 | 0.001 | 5.70E-12 | 23        | 14387     | 0.56       | -0.002        | 0.026           | 9.32E-01        | 0.4  | 4.58E-05           |
| rs11210229                    | 1:73860028       | A/G    | 0.38     | 0.012 | 0.001 | 2.00E-16 | 23        | 14387     | 0.45       | -0.025        | 0.026           | 3.48E-01        | 17.4 | 6.48E-05           |
| rs7553348                     | 1:75005067       | G/A    | 0.44     | 0.010 | 0.001 | 5.20E-12 | 23        | 14387     | 0.44       | 0.009         | 0.026           | 7.44E-01        | 4.8  | 4.57E-05           |
| rs10922907                    | 1:91193049       | A/T    | 0.45     | 0.010 | 0.001 | 3.00E-13 | 23        | 14387     | 0.48       |               | Excluded for MR |                 |      |                    |
| rs1931263                     | 1:96175101       | T/G    | 0.49     | 0.008 | 0.001 | 4.00E-08 | 23        | 14387     | 0.50       | -0.026        | 0.026           | 3.16E-01        | 2.8  | 2.89E-05           |
| rs7519626                     | 1:99514554       | C/T    | 0.32     | 0.008 | 0.001 | 1.20E-08 | 23        | 14387     | 0.36       | 0.005         | 0.028           | 8.64E-01        | 12   | 3.10E-05           |
| rs9435340                     | 1:107593201      | T/A    | 0.34     | 0.008 | 0.001 | 1.20E-08 | 23        | 14387     | 0.35       | 0.013         | 0.028           | 6.37E-01        | 0    | 3.15E-05           |
| rs10918701                    | 1:162090536      | G/A    | 0.37     | 0.008 | 0.001 | 2.10E-08 | 23        | 14387     | 0.40       | -0.017        | 0.026           | 5.25E-01        | 17   | 3.01E-05           |
| rs2867112                     | 2:651349         | T/G    | 0.83     | 0.015 | 0.002 | 4.80E-15 | 23        | 14387     | 0.82       | 0.015         | 0.034           | 6.59E-01        | 5.9  | 6.03E-05           |
| rs6741228                     | 2:22548774       | T/C    | 0.43     | 0.008 | 0.001 | 1.60E-08 | 23        | 14387     | 0.44       | -0.015        | 0.026           | 5.56E-01        | 10.9 | 3.09E-05           |
| rs62135536                    | 2:44326028       | C/T    | 0.97     | 0.024 | 0.004 | 8.00E-10 | 18        | 13065     | 0.97       | -0.006        | 0.086           | 9.49E-01        | 13.6 | 3.64E-05           |
| rs7569203                     | 2:45154418       | C/A    | 0.31     | 0.011 | 0.002 | 7.40E-13 | 23        | 14387     | 0.32       | 0.058         | 0.035           | 9.40E-02        | 27.7 | 4.96E-05           |
| rs13016665                    | 2:57995348       | A/C    | 0.42     | 0.008 | 0.001 | 1.80E-09 | 23        | 14387     | 0.42       | 0.041         | 0.027           | 1.19E-01        | 0    | 3.52E-05           |
| rs4671357 <sup>a</sup>        | 2:60136176       | C/T    | 0.48     | 0.009 | 0.001 | 1.10E-11 | 23        | 14386     | 0.47       | -0.018        | 0.026           | 4.82E-01        | 0    | 4.45E-05           |
| rs359243                      | 2:60475509       | C/T    | 0.61     | 0.009 | 0.001 | 9.50E-10 | 23        | 14387     | 0.57       | -0.013        | 0.035           | 7.03E-01        | 32.1 | 3.63E-05           |
| rs2678670                     | 2:104469564      | A/T    | 0.49     | 0.009 | 0.001 | 3.10E-10 | 23        | 14387     | 0.50       |               | Excluded for MR |                 |      |                    |
| rs62155874                    | 2:105973094      | G/A    | 0.13     | 0.017 | 0.002 | 5.20E-16 | 23        | 14387     | 0.12       | -0.023        | 0.039           | 5.63E-01        | 0    | 6.32E-05           |
| rs3811038                     | 2:113240183      | C/T    | 0.28     | 0.010 | 0.002 | 8.90E-10 | 23        | 14387     | 0.28       | -0.004        | 0.029           | 8.90E-01        | 9.1  | 3.64E-05           |
| rs2890772                     | 2:146175106      | T/G    | 0.59     | 0.014 | 0.001 | 1.70E-22 | 23        | 14387     | 0.55       | 0.009         | 0.026           | 7.20E-01        | 0    | 9.10E-05           |
| rs62175972                    | 2:161362830      | T/C    | 0.97     | 0.022 | 0.004 | 1.10E-08 | 23        | 14387     | 0.96       | 0.050         | 0.069           | 4.66E-01        | 0    | 3.11E-05           |
| rs3769949                     | 2:166199284      | A/T    | 0.47     | 0.008 | 0.001 | 2.50E-09 | 23        | 14387     | 0.47       |               | Excluded for MR |                 |      |                    |
| rs13009008                    | 2:174043233      | A/G    | 0.33     | 0.009 | 0.001 | 4.60E-09 | 23        | 14387     | 0.35       | 0.045         | 0.027           | 9.27E-02        | 0    | 3.28E-05           |
| rs4473348                     | 2:182073742      | T/A    | 0.75     | 0.010 | 0.002 | 6.40E-11 | 23        | 14387     | 0.76       | -0.037        | 0.030           | 2.21E-01        | 13.6 | 4.08E-05           |
| rs12623702                    | 2:202885506      | G/A    | 0.39     | 0.010 | 0.001 | 7.70E-12 | 23        | 14387     | 0.37       | -0.048        | 0.027           | 6.88E-02        | 0    | 4.53E-05           |
| rs6779302                     | 3:16859710       | T/G    | 0.37     | 0.009 | 0.001 | 1.20E-09 | 23        | 14387     | 0.35       | 0.041         | 0.027           | 1.25E-01        | 0    | 3.56E-05           |
| rs6778080 <sup>a</sup>        | 3:49317338       | T/C    | 0.27     | 0.011 | 0.002 | 1.30E-12 | 23        | 14387     | 0.27       | -0.018        | 0.030           | 5.39E-01        | 2.8  | 4.84E-05           |
| rs775758                      | 3:77582005       | A/T    | 0.43     | 0.008 | 0.001 | 1.10E-08 | 23        | 14387     | 0.43       |               | Excluded for MR |                 |      |                    |
| rs421983                      | 3:84892866       | T/C    | 0.52     | 0.009 | 0.001 | 3.30E-10 | 23        | 14387     | 0.50       | 0.004         | 0.025           | 8.64E-01        | 14.2 | 3.79E-05           |
| rs326341                      | 3:107811142      | G/A    | 0.52     | 0.009 | 0.001 | 1.20E-11 | 23        | 14387     | 0.55       | -0.012        | 0.026           | 6.48E-01        | 0    | 4.44E-05           |
| rs73220544                    | 3:131074511      | C/A    | 0.16     | 0.011 | 0.002 | 1.50E-08 | 21        | 13998     | 0.18       | -0.062        | 0.037           | 9.73E-02        | 0    | 3.11E-05           |
| rs9842947                     | 3:157412246      | T/C    | 0.67     | 0.009 | 0.001 | 3.10E-09 | 23        | 14387     | 0.70       | 0.033         | 0.029           | 2.51E-01        | 0    | 3.38E-05           |
| rs624833 <sup>a</sup>         | 4:2881256        | T/G    | 0.69     | 0.009 | 0.002 | 6.60E-10 | 23        | 14387     | 0.69       | <b>-0.076</b> | <b>0.031</b>    | <b>1.30E-02</b> | 10.7 | 3.66E-05           |
| rs61796681                    | 4:23678196       | T/A    | 0.09     | 0.013 | 0.002 | 4.20E-08 | 23        | 14387     | 0.07       | 0.025         | 0.049           | 6.17E-01        | 6.7  | 2.88E-05           |
| rs317021                      | 4:35418368       | A/T    | 0.19     | 0.012 | 0.002 | 1.10E-10 | 23        | 14387     | 0.16       | 0.030         | 0.035           | 3.96E-01        | 15.1 | 4.05E-05           |
| rs72678864                    | 4:112422145      | G/A    | 0.83     | 0.012 | 0.002 | 1.60E-11 | 23        | 14387     | 0.85       | 0.025         | 0.037           | 4.88E-01        | 0    | 4.36E-05           |
| rs17576594                    | 4:147952241      | G/A    | 0.72     | 0.011 | 0.002 | 1.70E-12 | 23        | 14387     | 0.74       | -0.044        | 0.029           | 1.27E-01        | 0    | 4.80E-05           |
| rs11948770                    | 5:13246336       | C/T    | 0.23     | 0.010 | 0.002 | 4.90E-10 | 23        | 14387     | 0.23       | -0.045        | 0.030           | 1.38E-01        | 23.6 | 3.73E-05           |
| rs71627581                    | 5:43161351       | G/A    | 0.89     | 0.013 | 0.002 | 1.60E-09 | 15        | 8384      |            |               | Excluded for MR |                 |      |                    |

| SNP                     | Chr:Pos (GRCh37) | Exposure |      |       |       |          | Courage-PD |           |                 |                 |              | R <sup>2</sup>  |      |                    |
|-------------------------|------------------|----------|------|-------|-------|----------|------------|-----------|-----------------|-----------------|--------------|-----------------|------|--------------------|
|                         |                  | E/A/BA   | EAF  | Beta  | SE    | p        | N studies  | N samples | EAF             | Beta            | SE           |                 | p    | I <sup>2</sup> (%) |
| rs10052591              | 5:50812738       | T/C      | 0.57 | 0.008 | 0.001 | 2.10E-09 | 23         | 14387     | 0.57            | 0.026           | 0.026        | 3.10E-01        | 0    | 3.45E-05           |
| rs2080870               | 5:60388313       | A/T      | 0.26 | 0.009 | 0.002 | 4.90E-08 | 23         | 14387     | 0.25            | <b>0.062</b>    | <b>0.030</b> | <b>3.68E-02</b> | 0    | 2.85E-05           |
| rs4571506 <sup>a</sup>  | 5:87756918       | C/T      | 0.54 | 0.008 | 0.001 | 1.50E-08 | 23         | 14385     | 0.51            | <b>-0.053</b>   | <b>0.026</b> | <b>4.10E-02</b> | 0    | 3.08E-05           |
| rs4957528               | 5:106420589      | C/A      | 0.79 | 0.010 | 0.002 | 4.20E-09 | 10         | 5308      | Excluded for MR |                 |              |                 |      |                    |
| rs329120 <sup>a</sup>   | 5:133861756      | C/T      | 0.58 | 0.010 | 0.001 | 6.30E-12 | 23         | 14387     | 0.57            | -0.045          | 0.026        | 8.41E-02        | 0    | 4.54E-05           |
| rs986391                | 5:166993972      | G/A      | 0.37 | 0.011 | 0.001 | 9.40E-15 | 23         | 14387     | 0.38            | -0.020          | 0.027        | 4.73E-01        | 0    | 5.76E-05           |
| rs13153393              | 5:167604213      | G/A      | 0.12 | 0.014 | 0.002 | 2.50E-10 | 23         | 14387     | 0.11            | 0.054           | 0.041        | 1.88E-01        | 10.7 | 3.88E-05           |
| rs245774                | 5:170530930      | G/A      | 0.73 | 0.009 | 0.002 | 7.40E-09 | 23         | 14387     | 0.71            | -0.053          | 0.029        | 6.81E-02        | 0    | 3.22E-05           |
| rs6935954               | 6:26255451       | A/G      | 0.42 | 0.010 | 0.001 | 8.20E-12 | 23         | 14387     | 0.39            | 0.028           | 0.033        | 4.01E-01        | 25.5 | 4.48E-05           |
| rs2254710               | 6:37477000       | C/A      | 0.24 | 0.009 | 0.002 | 3.50E-08 | 23         | 14387     | 0.23            | 0.028           | 0.042        | 5.05E-01        | 33.1 | 2.92E-05           |
| rs2894808               | 6:52861990       | A/T      | 0.08 | 0.015 | 0.003 | 3.50E-09 | 23         | 14387     | 0.10            | 0.007           | 0.044        | 8.70E-01        | 0    | 3.36E-05           |
| rs12202536              | 6:67475273       | G/A      | 0.49 | 0.008 | 0.001 | 2.80E-09 | 23         | 14387     | 0.46            | <b>-0.068</b>   | <b>0.026</b> | <b>8.41E-03</b> | 20.2 | 3.39E-05           |
| rs7766610               | 6:111707821      | C/A      | 0.18 | 0.013 | 0.002 | 2.20E-12 | 23         | 14387     | 0.19            | -0.058          | 0.043        | 1.84E-01        | 29.6 | 4.73E-05           |
| rs1922018               | 7:3560401        | C/T      | 0.36 | 0.010 | 0.001 | 3.00E-12 | 23         | 14387     | 0.35            | -0.014          | 0.027        | 6.11E-01        | 0    | 4.66E-05           |
| rs10226228              | 7:32315613       | G/A      | 0.37 | 0.011 | 0.001 | 2.00E-15 | 23         | 14387     | 0.36            | -0.034          | 0.027        | 2.04E-01        | 0    | 6.07E-05           |
| rs11768481              | 7:96629103       | C/A      | 0.67 | 0.009 | 0.001 | 9.90E-10 | 5          | 3107      | Excluded for MR |                 |              |                 |      |                    |
| rs6962772               | 7:99081730       | A/G      | 0.85 | 0.011 | 0.002 | 7.80E-09 | 23         | 14387     | 0.85            | -0.012          | 0.036        | 7.28E-01        | 0    | 3.20E-05           |
| rs10282292 <sup>a</sup> | 7:111092478      | C/T      | 0.36 | 0.009 | 0.001 | 5.90E-10 | 23         | 14386     | 0.37            | 0.019           | 0.027        | 4.73E-01        | 0    | 3.71E-05           |
| rs2401924               | 7:115057862      | G/C      | 0.50 | 0.011 | 0.001 | 2.70E-14 | 23         | 14387     | 0.51            | Excluded for MR |              |                 |      |                    |
| rs7807019               | 7:117543063      | G/A      | 0.46 | 0.010 | 0.001 | 6.70E-14 | 23         | 14387     | 0.45            | 0.020           | 0.026        | 4.32E-01        | 5.5  | 5.39E-05           |
| rs6957896 <sup>a</sup>  | 7:132309592      | T/C      | 0.50 | 0.008 | 0.001 | 4.50E-08 | 22         | 13529     | 0.50            | -0.039          | 0.035        | 2.67E-01        | 32   | 2.88E-05           |
| rs4731925               | 7:132664757      | T/C      | 0.68 | 0.008 | 0.001 | 2.60E-08 | 23         | 14387     | 0.69            | -0.035          | 0.028        | 2.06E-01        | 0    | 2.97E-05           |
| rs35169606              | 8:9604066        | T/G      | 0.61 | 0.009 | 0.001 | 1.20E-09 | 16         | 9769      | Excluded for MR |                 |              |                 |      |                    |
| rs11783093              | 8:27425349       | C/T      | 0.84 | 0.016 | 0.002 | 1.20E-16 | 23         | 14387     | 0.84            | -0.021          | 0.035        | 5.46E-01        | 21.5 | 6.67E-05           |
| rs2062882 <sup>a</sup>  | 8:91839576       | A/G      | 0.41 | 0.008 | 0.001 | 1.10E-08 | 23         | 14387     | 0.43            | -0.022          | 0.026        | 3.87E-01        | 0    | 3.19E-05           |
| rs72674867              | 8:95578201       | A/T      | 0.76 | 0.009 | 0.002 | 3.80E-08 | 23         | 14387     | 0.73            | 0.015           | 0.029        | 6.04E-01        | 15.3 | 2.91E-05           |
| rs4543592               | 9:3014254        | C/T      | 0.48 | 0.009 | 0.001 | 4.50E-10 | 23         | 14387     | 0.48            | -0.026          | 0.026        | 3.25E-01        | 17.6 | 3.75E-05           |
| rs7039819               | 9:82430418       | G/A      | 0.43 | 0.009 | 0.001 | 5.10E-10 | 23         | 14387     | 0.42            | -0.009          | 0.027        | 7.52E-01        | 0    | 3.73E-05           |
| rs1246265               | 9:86761745       | C/T      | 0.70 | 0.009 | 0.002 | 4.20E-09 | 23         | 14387     | 0.69            | -0.020          | 0.035        | 5.77E-01        | 26.2 | 3.33E-05           |
| rs1221148               | 9:122046875      | C/G      | 0.59 | 0.009 | 0.001 | 7.30E-11 | 23         | 14387     | 0.61            | 0.026           | 0.027        | 3.38E-01        | 0    | 4.07E-05           |
| rs13296519              | 9:128471924      | T/G      | 0.39 | 0.010 | 0.001 | 8.10E-12 | 23         | 14387     | 0.39            | -0.024          | 0.027        | 3.56E-01        | 10   | 4.49E-05           |
| rs113382419             | 9:136463019      | A/C      | 0.11 | 0.028 | 0.002 | 3.00E-37 | 23         | 14387     | 0.10            | -0.017          | 0.044        | 6.92E-01        | 0    | 1.57E-04           |
| rs11255908              | 10:8802912       | G/T      | 0.26 | 0.010 | 0.002 | 2.30E-10 | 23         | 14387     | 0.26            | -0.015          | 0.029        | 6.13E-01        | 0    | 3.87E-05           |
| rs2675638 <sup>a</sup>  | 10:63576286      | G/A      | 0.58 | 0.008 | 0.001 | 1.30E-09 | 23         | 14385     | 0.61            | -0.021          | 0.026        | 4.22E-01        | 0    | 3.52E-05           |
| rs10823968              | 10:74738269      | A/T      | 0.63 | 0.008 | 0.001 | 2.10E-08 | 23         | 14387     | 0.65            | 0.009           | 0.027        | 7.29E-01        | 3.1  | 3.08E-05           |
| rs17553262 <sup>c</sup> | 10:92912773      | C/A      | 0.12 | 0.013 | 0.002 | 5.30E-09 | 9          | 4488      | Excluded for MR |                 |              |                 |      |                    |
| rs7077678               | 10:104438565     | C/T      | 0.62 | 0.009 | 0.001 | 2.60E-09 | 23         | 14387     | 0.62            | 0.000           | 0.026        | 9.93E-01        | 0    | 3.43E-05           |
| rs12244388              | 10:104640052     | A/G      | 0.34 | 0.013 | 0.001 | 1.40E-19 | 23         | 14387     | 0.37            | <b>-0.055</b>   | <b>0.026</b> | <b>3.57E-02</b> | 0    | 7.87E-05           |
| rs3896224 <sup>a</sup>  | 10:106467853     | A/G      | 0.59 | 0.010 | 0.001 | 1.10E-11 | 23         | 14387     | 0.54            | -0.008          | 0.026        | 7.52E-01        | 0    | 4.50E-05           |
| rs34866095              | 11:16377356      | G/A      | 0.31 | 0.009 | 0.002 | 1.20E-08 | 23         | 14387     | 0.33            | -0.044          | 0.028        | 1.11E-01        | 12.6 | 3.16E-05           |
| rs75742406              | 11:17070365      | G/A      | 0.74 | 0.010 | 0.002 | 1.30E-09 | 23         | 14387     | 0.77            | -0.024          | 0.039        | 5.50E-01        | 29.7 | 3.57E-05           |
| rs17309874              | 11:27667236      | A/G      | 0.26 | 0.011 | 0.002 | 9.70E-13 | 23         | 14387     | 0.22            | -0.037          | 0.031        | 2.33E-01        | 0    | 4.90E-05           |
| rs4391802               | 11:28674592      | A/G      | 0.71 | 0.010 | 0.002 | 1.40E-11 | 23         | 14387     | 0.71            | <b>0.057</b>    | <b>0.029</b> | <b>4.64E-02</b> | 0    | 4.41E-05           |

| SNP         | Chr:Pos (GRCh37) | Exposure |      |       |       |          | Courage-PD       |           |                 |               |              | R <sup>2</sup>  |      |                    |
|-------------|------------------|----------|------|-------|-------|----------|------------------|-----------|-----------------|---------------|--------------|-----------------|------|--------------------|
|             |                  | E/A/BA   | EAF  | Beta  | SE    | p        | N studies        | N samples | EAF             | Beta          | SE           |                 | p    | I <sup>2</sup> (%) |
| rs112282219 | 11:46632809      | A/G      | 0.04 | 0.023 | 0.004 | 3.80E-11 | 22               | 14205     | 0.04            | 0.023         | 0.069        | 7.38E-01        | 0    | 4.23E-05           |
| rs9919670   | 11:1112877304    | A/G      | 0.39 | 0.015 | 0.001 | 7.60E-27 | 23               | 14387     | 0.39            | -0.013        | 0.026        | 6.26E-01        | 0    | 1.10E-04           |
| rs74086911  | 12:50015942      | G/A      | 0.93 | 0.015 | 0.003 | 2.10E-08 | 23               | 14387     | 0.93            | -0.045        | 0.050        | 3.73E-01        | 0    | 3.02E-05           |
| rs7297175   | 12:56473808      | C/T      | 0.57 | 0.008 | 0.001 | 6.60E-09 | 23               | 14387     | 0.58            | 0.011         | 0.027        | 6.96E-01        | 0    | 3.23E-05           |
| rs10879871  | 12:75380511      | G/T      | 0.66 | 0.010 | 0.001 | 5.00E-11 | 23               | 14387     | 0.60            | -0.012        | 0.027        | 6.69E-01        | 0    | 4.14E-05           |
| rs12831617  | 12:84758368      | T/C      | 0.24 | 0.009 | 0.002 | 1.90E-08 | 23               | 14387     | 0.25            | 0.023         | 0.029        | 4.42E-01        | 0    | 3.04E-05           |
| rs6562474   | 13:67332812      | C/G      | 0.65 | 0.008 | 0.001 | 1.00E-08 | 23               | 14387     | 0.65            | -0.004        | 0.027        | 8.86E-01        | 0    | 3.18E-05           |
| rs7333559   | 13:100546450     | G/A      | 0.21 | 0.011 | 0.002 | 3.20E-10 | 21               | 13839     | 0.24            | -0.034        | 0.033        | 2.96E-01        | 7.9  | 3.85E-05           |
| rs860326    | 14:57342912      | C/T      | 0.43 | 0.008 | 0.001 | 2.70E-09 | 23               | 14387     | 0.42            | 0.011         | 0.026        | 6.83E-01        | 18   | 3.40E-05           |
| rs7155595   | 14:77502546      | C/A      | 0.33 | 0.009 | 0.001 | 2.50E-09 | 23               | 14387     | 0.32            | -0.012        | 0.028        | 6.75E-01        | 0    | 3.44E-05           |
| rs742365    | 14:104198251     | C/T      | 0.40 | 0.011 | 0.001 | 2.50E-14 | 23               | 14387     | 0.37            | 0.001         | 0.027        | 9.77E-01        | 0    | 5.61E-05           |
| rs35175834  | 15:47680815      | A/G      | 0.21 | 0.016 | 0.002 | 4.60E-22 | 23               | 14387     | 0.22            | -0.043        | 0.031        | 1.62E-01        | 10.2 | 8.98E-05           |
| rs28485305  | 15:74044197      | C/T      | 0.63 | 0.008 | 0.001 | 2.60E-08 | 23               | 14387     | 0.60            | 0.015         | 0.026        | 5.61E-01        | 0    | 2.98E-05           |
| rs8042849   | 15:78817929      | C/T      | 0.34 | 0.019 | 0.001 | 1.80E-39 | 23               | 14387     | 0.39            | -0.019        | 0.027        | 4.81E-01        | 0    | 1.66E-04           |
| rs8042134   | 15:97514404      | G/T      | 0.46 | 0.010 | 0.001 | 1.30E-12 | 23               | 14387     | 0.44            | 0.047         | 0.026        | 7.40E-02        | 0    | 4.91E-05           |
| rs6598539   | 15:99204483      | C/T      | 0.51 | 0.008 | 0.001 | 4.50E-09 | 23               | 14387     | 0.49            | -0.019        | 0.026        | 4.64E-01        | 23.9 | 3.32E-05           |
| rs11861214  | 16:7466611       | G/T      | 0.78 | 0.009 | 0.002 | 2.00E-08 | 22               | 14161     | 0.79            | 0.046         | 0.032        | 1.49E-01        | 17.8 | 3.03E-05           |
| rs12708665  | 16:24728227      | G/A      | 0.72 | 0.009 | 0.002 | 3.50E-09 | 23               | 14387     | 0.68            | -0.013        | 0.028        | 6.36E-01        | 0    | 3.36E-05           |
| rs57611503  | 16:31165795      | G/A      | 0.48 | 0.008 | 0.001 | 4.00E-08 | 20               | 13192     | 0.46            | <b>-0.100</b> | <b>0.029</b> | <b>4.95E-04</b> | 12.5 | 3.00E-05           |
| rs889398    | 16:69556715      | C/T      | 0.59 | 0.009 | 0.001 | 6.30E-11 | 18               | 10342     | 0.59            | 0.013         | 0.048        | 7.86E-01        | 45.4 | 4.14E-05           |
| rs60952428  | 16:75640521      | T/C      | 0.91 | 0.013 | 0.002 | 3.00E-08 | 14               | 6978      | Excluded for MR |               |              |                 |      |                    |
| rs1050847   | 16:87443734      | C/T      | 0.43 | 0.008 | 0.001 | 1.40E-08 | 23               | 14387     | 0.49            | -0.013        | 0.026        | 6.21E-01        | 11.3 | 3.11E-05           |
| rs369230    | 16:89645437      | T/G      | 0.69 | 0.009 | 0.002 | 1.80E-09 | 22               | 14161     | 0.74            | -0.043        | 0.030        | 1.55E-01        | 3    | 3.52E-05           |
| rs8614      | 17:27588806      | A/C      | 0.18 | 0.011 | 0.002 | 1.80E-10 | 22               | 13821     | 0.17            | <b>0.084</b>  | <b>0.037</b> | <b>2.24E-02</b> | 0    | 3.92E-05           |
| rs732083    | 17:37834367      | G/A      | 0.33 | 0.008 | 0.001 | 1.50E-08 | 23               | 14387     | 0.36            | -0.028        | 0.028        | 3.23E-01        | 15.4 | 3.10E-05           |
| rs9904288   | 17:47031973      | T/C      | 0.71 | 0.008 | 0.002 | 3.10E-08 | 23               | 14387     | 0.71            | -0.018        | 0.028        | 5.38E-01        | 0    | 2.94E-05           |
| rs67596067  | 17:50333733      | A/G      | 0.35 | 0.009 | 0.001 | 1.20E-09 | 23               | 14387     | 0.33            | 0.009         | 0.027        | 7.47E-01        | 0    | 3.59E-05           |
| rs12967855  | 18:35138245      | A/G      | 0.33 | 0.008 | 0.001 | 3.10E-08 | 23               | 14387     | 0.35            | -0.040        | 0.028        | 1.52E-01        | 1.3  | 2.97E-05           |
| rs62098013  | 18:50863861      | A/G      | 0.36 | 0.009 | 0.001 | 4.10E-09 | 23               | 14387     | 0.36            | 0.043         | 0.027        | 1.14E-01        | 23.6 | 3.38E-05           |
| rs71367545  | 18:77576337      | A/G      | 0.21 | 0.010 | 0.002 | 1.40E-09 | 23               | 14387     | 0.17            | 0.023         | 0.034        | 4.98E-01        | 0    | 3.53E-05           |
| rs76608582  | 19:4474725       | C/A      | 0.95 | 0.022 | 0.003 | 3.20E-10 | NA in COURAGE-PD |           |                 |               |              |                 |      |                    |
| rs35343344  | 19:18471610      | C/A      | 0.73 | 0.009 | 0.002 | 8.80E-09 | 23               | 14387     | 0.75            | 0.056         | 0.031        | 7.27E-02        | 0    | 3.30E-05           |
| rs4814873   | 20:19616429      | C/T      | 0.77 | 0.010 | 0.002 | 2.90E-09 | 23               | 14387     | 0.75            | -0.013        | 0.030        | 6.68E-01        | 0    | 3.38E-05           |
| rs6119897   | 20:31145415      | A/G      | 0.24 | 0.013 | 0.002 | 3.60E-15 | 23               | 14387     | 0.21            | -0.018        | 0.032        | 5.89E-01        | 0    | 5.95E-05           |
| rs12481282  | 20:44761377      | C/G      | 0.28 | 0.009 | 0.002 | 7.80E-09 | 23               | 14387     | 0.26            | -0.020        | 0.030        | 5.15E-01        | 0    | 3.21E-05           |
| rs348809    | 20:59032097      | G/A      | 0.65 | 0.008 | 0.001 | 1.30E-08 | 23               | 14387     | 0.62            | -0.012        | 0.027        | 6.62E-01        | 0    | 3.11E-05           |
| rs6011779   | 20:61984317      | C/T      | 0.19 | 0.019 | 0.002 | 2.30E-27 | 22               | 14161     | 0.22            | -0.017        | 0.032        | 6.00E-01        | 0    | 1.13E-04           |
| rs147412694 | 21:40702786      | A/G      | 0.15 | 0.012 | 0.002 | 2.90E-09 | 23               | 14387     | 0.14            | -0.024        | 0.038        | 5.22E-01        | 0    | 3.41E-05           |
| rs2838834   | 21:46665208      | T/C      | 0.30 | 0.009 | 0.002 | 6.30E-10 | 23               | 14387     | 0.29            | 0.016         | 0.028        | 5.61E-01        | 19.7 | 3.69E-05           |
| rs136233    | 22:31212410      | G/A      | 0.19 | 0.010 | 0.002 | 1.80E-08 | 23               | 14387     | 0.19            | -0.037        | 0.032        | 2.50E-01        | 0    | 3.06E-05           |
| rs202645    | 22:41798520      | G/A      | 0.80 | 0.010 | 0.002 | 3.90E-09 | 23               | 14387     | 0.77            | <b>0.122</b>  | <b>0.032</b> | <b>1.47E-04</b> | 3.5  | 3.34E-05           |

Smoking initiation (per 1-SD increase in the prevalence of ever smoking)

| SNP         | Chr:Pos (GRCh37) | Exposure |      |       |       |          | Courage-PD |           |      |        |       | R <sup>2</sup> |      |                    |
|-------------|------------------|----------|------|-------|-------|----------|------------|-----------|------|--------|-------|----------------|------|--------------------|
|             |                  | E/A/BA   | EAF  | Beta  | SE    | p        | N studies  | N samples | EAF  | Beta   | SE    |                | p    | I <sup>2</sup> (%) |
| rs12130857  | 1:7791461        | G/A      | 0.68 | 0.018 | 0.003 | 3.65E-11 | 23         | 14387     | 0.69 | -0.027 | 0.028 | 3.34E-01       | 0    | 1.42E-04           |
| rs3820277   | 1:18436657       | G/T      | 0.47 | 0.019 | 0.003 | 1.57E-13 | 23         | 14387     | 0.50 | -0.032 | 0.037 | 3.90E-01       | 42.3 | 1.77E-04           |
| rs1889571   | 1:32195819       | G/T      | 0.13 | 0.022 | 0.004 | 4.19E-09 | 23         | 14387     | 0.12 | 0.010  | 0.040 | 8.13E-01       | 0    | 1.12E-04           |
| rs10914684  | 1:33795572       | G/A      | 0.68 | 0.016 | 0.003 | 6.32E-09 | 23         | 14387     | 0.66 | -0.027 | 0.027 | 3.16E-01       | 9.1  | 1.09E-04           |
| rs951740    | 1:44011737       | A/G      | 0.62 | 0.030 | 0.003 | 3.82E-29 | 23         | 14387     | 0.61 | -0.041 | 0.026 | 1.24E-01       | 5.5  | 4.09E-04           |
| rs12022778  | 1:50603995       | C/A      | 0.20 | 0.027 | 0.003 | 3.18E-17 | 23         | 14387     | 0.18 | 0.060  | 0.033 | 6.97E-02       | 5    | 2.32E-04           |
| rs4912332   | 1:58815243       | T/C      | 0.49 | 0.014 | 0.003 | 2.94E-08 | 23         | 14387     | 0.47 | 0.028  | 0.026 | 2.82E-01       | 0    | 9.97E-05           |
| rs80054503  | 1:72900406       | T/C      | 0.88 | 0.024 | 0.004 | 3.10E-09 | 23         | 14387     | 0.43 | -0.041 | 0.026 | 1.21E-01       | 12.5 | 2.60E-04           |
| rs10789369  | 1:73824909       | A/G      | 0.38 | 0.023 | 0.003 | 3.39E-19 | 23         | 14387     | 0.42 | 0.007  | 0.026 | 8.02E-01       | 16.3 | 1.81E-04           |
| rs1514176   | 1:74991596       | G/A      | 0.42 | 0.019 | 0.003 | 7.67E-14 | 23         | 14387     | 0.65 | -0.026 | 0.027 | 3.35E-01       | 10.5 | 1.11E-04           |
| rs11162019  | 1:87913176       | C/T      | 0.64 | 0.015 | 0.003 | 5.06E-09 | 23         | 14387     | 0.40 | -0.025 | 0.040 | 5.27E-01       | 48.6 | 2.50E-04           |
| rs1008078   | 1:911189731      | T/C      | 0.40 | 0.023 | 0.003 | 1.63E-18 | 23         | 14387     | 0.89 | 0.001  | 0.042 | 9.77E-01       | 0    | 1.25E-04           |
| rs12027999  | 1:154206358      | T/C      | 0.88 | 0.024 | 0.004 | 5.33E-10 | 23         | 14387     | 0.20 | -0.019 | 0.033 | 5.69E-01       | 21.8 | 1.30E-04           |
| rs45444697  | 1:155034632      | G/C      | 0.21 | 0.020 | 0.003 | 2.72E-10 | 23         | 14387     | 0.54 | -0.008 | 0.026 | 7.60E-01       | 10.4 | 1.48E-04           |
| rs2901785   | 1:174104743      | G/A      | 0.55 | 0.017 | 0.003 | 1.47E-11 | 23         | 14387     | 0.51 | 0.002  | 0.026 | 9.33E-01       | 0    | 1.09E-04           |
| rs147052174 | 1:179783167      | T/G      | 0.02 | 0.062 | 0.010 | 2.30E-10 | 13         | 7882      | 0.29 | -0.003 | 0.028 | 9.14E-01       | 0    | 1.02E-04           |
| rs35656245  | 1:190957480      | A/G      | 0.28 | 0.016 | 0.003 | 2.23E-08 | 23         | 14387     | 0.78 | 0.017  | 0.031 | 5.70E-01       | 0    | 1.56E-04           |
| rs12739243  | 1:210302043      | T/C      | 0.78 | 0.021 | 0.003 | 4.45E-12 | 23         | 14387     | 0.66 | 0.051  | 0.028 | 6.89E-02       | 17   | 1.46E-04           |
| rs876793    | 1:237852083      | T/C      | 0.65 | 0.018 | 0.003 | 5.69E-11 | 23         | 14387     | 0.80 | 0.016  | 0.033 | 6.34E-01       | 0    | 2.87E-04           |
| rs6731872   | 2:624205         | G/T      | 0.83 | 0.032 | 0.003 | 5.35E-21 | 23         | 14387     | 0.51 | 0.002  | 0.026 | 9.33E-01       | 0    | 1.09E-04           |
| rs1022376   | 2:22067213       | T/C      | 0.48 | 0.015 | 0.003 | 1.66E-08 | 23         | 14387     | 0.37 | -0.012 | 0.027 | 6.58E-01       | 8    | 1.44E-04           |
| rs61533748  | 2:22582968       | C/T      | 0.38 | 0.017 | 0.003 | 2.82E-11 | 23         | 14387     | 0.51 | -0.039 | 0.026 | 1.31E-01       | 0    | 1.57E-04           |
| rs2710634   | 2:32808804       | T/C      | 0.48 | 0.018 | 0.003 | 3.36E-12 | 23         | 14387     | 0.50 | 0.027  | 0.026 | 9.33E-01       | 0    | 1.09E-04           |
| rs7598402   | 2:50735943       | C/G      | 0.51 | 0.015 | 0.003 | 7.38E-09 | 23         | 14387     | 0.39 | -0.027 | 0.026 | 3.04E-01       | 0    | 1.42E-04           |
| rs10490159  | 2:51341259       | T/C      | 0.39 | 0.017 | 0.003 | 3.86E-11 | 23         | 14387     | 0.61 | -0.017 | 0.027 | 5.36E-01       | 24.7 | 2.24E-04           |
| rs359247    | 2:60477052       | T/A      | 0.64 | 0.022 | 0.003 | 9.89E-17 | 23         | 14387     | 0.52 | 0.011  | 0.026 | 6.71E-01       | 0    | 1.18E-04           |
| rs12714017  | 2:80999398       | C/T      | 0.51 | 0.015 | 0.003 | 3.65E-09 | 23         | 14387     | 0.87 | 0.012  | 0.039 | 7.53E-01       | 0    | 1.31E-04           |
| rs13392222  | 2:100672408      | A/C      | 0.86 | 0.023 | 0.004 | 1.93E-10 | 23         | 14387     | 0.52 | 0.024  | 0.038 | 5.33E-01       | 45.5 | 4.63E-04           |
| rs1901477   | 2:104126983      | G/A      | 0.51 | 0.030 | 0.003 | 2.07E-31 | 23         | 14387     | 0.28 | -0.004 | 0.029 | 8.90E-01       | 9.1  | 1.47E-04           |
| rs3811038   | 2:113240183      | C/T      | 0.28 | 0.019 | 0.003 | 1.58E-11 | 23         | 14387     | 0.17 | -0.035 | 0.044 | 4.30E-01       | 26.8 | 1.33E-04           |
| rs34399632  | 2:137571174      | G/A      | 0.23 | 0.019 | 0.003 | 1.46E-10 | 23         | 14387     | 0.46 | -0.023 | 0.026 | 3.72E-01       | 3.4  | 5.71E-04           |
| rs6756212   | 2:146140132      | C/T      | 0.47 | 0.034 | 0.003 | 3.49E-40 | 23         | 14387     | 0.89 | -0.041 | 0.040 | 3.08E-01       | 0    | 1.07E-04           |
| rs16826827  | 2:147825689      | T/C      | 0.88 | 0.022 | 0.004 | 9.17E-09 | 23         | 14387     | 0.54 | -0.023 | 0.026 | 3.58E-01       | 0    | 2.10E-04           |
| rs1445649   | 2:155682556      | C/T      | 0.54 | 0.021 | 0.003 | 8.48E-16 | 23         | 14387     | 0.40 | 0.043  | 0.027 | 1.08E-01       | 5    | 2.88E-04           |
| rs12474587  | 2:162802993      | T/G      | 0.43 | 0.024 | 0.003 | 4.83E-21 | 23         | 14387     | 0.21 | 0.014  | 0.031 | 6.52E-01       | 9.7  | 1.01E-04           |
| rs13007361  | 2:166250244      | A/G      | 0.21 | 0.018 | 0.003 | 2.29E-08 | 23         | 14387     | 0.75 | -0.025 | 0.030 | 3.96E-01       | 10.5 | 1.51E-04           |
| rs6750529   | 2:182027603      | T/C      | 0.74 | 0.020 | 0.003 | 9.26E-12 | 23         | 14387     | 0.52 | 0.013  | 0.026 | 6.11E-01       | 0    | 1.20E-04           |
| rs17229285  | 2:199523122      | C/T      | 0.50 | 0.015 | 0.003 | 1.27E-09 | 23         | 14387     | 0.80 | -0.006 | 0.044 | 8.84E-01       | 33.7 | 1.84E-04           |
| rs62193862  | 2:202843875      | A/G      | 0.10 | 0.024 | 0.004 | 1.99E-08 | 23         | 14387     | 0.17 | -0.032 | 0.034 | 3.49E-01       | 0    | 9.93E-05           |
| rs4674993   | 2:226332033      | A/G      | 0.80 | 0.024 | 0.003 | 4.85E-14 | 23         | 14387     | 0.34 | 0.051  | 0.027 | 5.61E-02       | 0    | 1.38E-04           |
| rs11713899  | 3:2365026        | C/A      | 0.17 | 0.019 | 0.003 | 3.15E-08 | 23         | 14387     | 0.33 | -0.007 | 0.027 | 7.88E-01       | 0    | 1.86E-04           |
| rs748832    | 3:16851202       | G/A      | 0.37 | 0.017 | 0.003 | 6.60E-11 | 23         | 14387     | 0.33 | 0.020  | 0.003 | 3.62E-14       | 0    | 1.86E-04           |
| rs2526390   | 3:50192760       | T/C      | 0.33 | 0.020 | 0.003 | 3.62E-14 | 23         | 14387     |      |        |       |                |      |                    |



| SNP         | Chr:Pos (GRCh37) | Exposure |      |       |       |          | Courage-PD |           |      |               |              | R <sup>2</sup>  |                 |                    |
|-------------|------------------|----------|------|-------|-------|----------|------------|-----------|------|---------------|--------------|-----------------|-----------------|--------------------|
|             |                  | E/A/BA   | EAF  | Beta  | SE    | p        | N studies  | N samples | EAF  | Beta          | SE           |                 | p               | I <sup>2</sup> (%) |
| rs221988    | 3:64234307       | A/C      | 0.62 | 0.015 | 0.003 | 1.43E-08 | 23         | 14387     | 0.62 | 0.024         | 0.027        | 3.90E-01        | 0               | 1.05E-04           |
| rs11128203  | 3:71064431       | A/T      | 0.53 | 0.020 | 0.003 | 1.29E-15 | 10         | 4792      | 0.67 | -0.045        | 0.029        | 1.18E-01        | Excluded for MR | 1.14E-04           |
| rs62246017  | 3:71483084       | G/A      | 0.68 | 0.016 | 0.003 | 3.03E-09 | 23         | 14387     | 0.80 | 0.065         | 0.043        | 1.31E-01        | 7.9             | 1.58E-04           |
| rs12633090  | 3:83241365       | G/C      | 0.82 | 0.023 | 0.003 | 3.16E-12 | 23         | 14387     | 0.39 | 0.019         | 0.026        | 4.69E-01        | 0               | 2.85E-04           |
| rs1549979   | 3:85460131       | C/T      | 0.38 | 0.025 | 0.003 | 8.80E-21 | 23         | 14387     | 0.59 | 0.024         | 0.026        | 3.54E-01        | 12.9            | 9.84E-05           |
| rs6437769   | 3:107997514      | T/C      | 0.58 | 0.014 | 0.003 | 3.74E-08 | 23         | 14387     | 0.73 | -0.043        | 0.029        | 1.47E-01        | 0               | 1.18E-04           |
| rs9288999   | 3:114147927      | A/G      | 0.74 | 0.017 | 0.003 | 1.50E-09 | 23         | 14387     | 0.82 | 0.058         | 0.035        | 9.38E-02        | 16.4            | 1.84E-04           |
| rs6438436   | 3:117822149      | T/C      | 0.82 | 0.025 | 0.003 | 5.33E-14 | 23         | 14387     | 0.44 | 0.017         | 0.026        | 5.24E-01        | 0.3             | 9.80E-05           |
| rs9826984   | 3:131945722      | G/A      | 0.46 | 0.014 | 0.003 | 3.87E-08 | 23         | 14387     | 0.80 | 0.024         | 0.033        | 4.57E-01        | 0               | 1.02E-04           |
| rs2279829   | 3:147106319      | C/T      | 0.78 | 0.017 | 0.003 | 2.05E-08 | 23         | 14387     | 0.13 | 0.017         | 0.052        | 7.45E-01        | 34.6            | 1.37E-04           |
| rs2319545   | 3:147719648      | A/C      | 0.15 | 0.023 | 0.004 | 8.30E-11 | 23         | 14387     | 0.61 | -0.007        | 0.026        | 8.01E-01        | 22.4            | 1.29E-04           |
| rs1714521   | 3:158284861      | A/C      | 0.59 | 0.016 | 0.003 | 3.07E-10 | 23         | 14387     | 0.53 | -0.010        | 0.036        | 7.82E-01        | 37.8            | 1.18E-04           |
| rs1449012   | 3:159048333      | C/T      | 0.54 | 0.015 | 0.003 | 1.77E-09 | 23         | 14387     | 0.57 | 0.015         | 0.038        | 6.84E-01        | 34.4            | 1.00E-04           |
| rs1187820   | 3:173072584      | C/T      | 0.56 | 0.014 | 0.003 | 2.69E-08 | 23         | 14387     | 0.19 | -0.059        | 0.047        | 2.12E-01        | 36.2            | 1.42E-04           |
| rs7631379   | 3:181409057      | C/T      | 0.21 | 0.021 | 0.003 | 3.94E-11 | 23         | 14387     | 0.57 | 0.033         | 0.033        | 9.73E-01        | 12.1            | 1.70E-04           |
| rs4140932   | 4:15458598       | T/A      | 0.57 | 0.014 | 0.003 | 4.89E-08 | 23         | 14387     | 0.20 | -0.001        | 0.033        | 9.73E-01        | 12.1            | 1.70E-04           |
| rs59537158  | 4:28246049       | T/C      | 0.21 | 0.022 | 0.003 | 4.62E-13 | 23         | 14387     | 0.63 | 0.018         | 0.027        | 5.09E-01        | 3.3             | 1.84E-04           |
| rs58400863  | 4:31184484       | G/A      | 0.65 | 0.020 | 0.003 | 4.89E-14 | 23         | 14387     | 0.18 | 0.010         | 0.033        | 7.69E-01        | 0               | 1.91E-04           |
| rs112725451 | 4:68017710       | T/C      | 0.17 | 0.026 | 0.003 | 1.65E-14 | 23         | 14387     | 0.49 | 0.035         | 0.035        | 6.77E-01        | 18.4            | 1.35E-04           |
| rs1160685   | 4:94052854       | G/C      | 0.45 | 0.015 | 0.003 | 2.31E-09 | 23         | 14387     | 0.83 | 0.015         | 0.032        | 7.58E-01        | 0               | 1.07E-04           |
| rs3934797   | 4:112467612      | G/A      | 0.82 | 0.021 | 0.003 | 1.12E-10 | 23         | 14387     | 0.80 | -0.010        | 0.027        | 8.13E-01        | 7               | 1.09E-04           |
| rs71602617  | 4:136406155      | C/T      | 0.78 | 0.018 | 0.003 | 2.10E-08 | 23         | 14387     | 0.35 | -0.006        | 0.027        | 8.13E-01        | 7               | 1.09E-04           |
| rs7696257   | 4:137474783      | A/G      | 0.37 | 0.015 | 0.003 | 6.78E-09 | 23         | 13928     | 0.71 | -0.020        | 0.030        | 5.05E-01        | 0               | 1.02E-04           |
| rs1116690   | 4:143510148      | G/A      | 0.74 | 0.016 | 0.003 | 2.16E-08 | 21         | 1387      | 0.62 | <b>-0.055</b> | <b>0.026</b> | <b>3.61E-02</b> | 0               | 2.90E-04           |
| rs13110073  | 4:147797913      | T/C      | 0.60 | 0.025 | 0.003 | 3.24E-21 | 23         | 14387     | 0.19 | -0.002        | 0.033        | 9.48E-01        | 0               | 9.74E-05           |
| rs62340589  | 4:176875795      | C/G      | 0.20 | 0.017 | 0.003 | 4.31E-08 | 23         | 14387     | 0.52 | 0.005         | 0.026        | 8.46E-01        | 0               | 1.17E-04           |
| rs12517438  | 5:30842054       | G/T      | 0.54 | 0.015 | 0.003 | 1.89E-09 | 23         | 14387     | 0.26 | 0.055         | 0.029        | 5.69E-02        | 19.2            | 1.71E-04           |
| rs35375873  | 5:43190647       | G/C      | 0.89 | 0.027 | 0.004 | 3.29E-11 | 23         | 14387     | 0.47 | -0.002        | 0.026        | 9.45E-01        | 0               | 1.17E-04           |
| rs71592686  | 5:60121271       | C/T      | 0.27 | 0.021 | 0.003 | 3.85E-13 | 23         | 14387     | 0.51 | -0.044        | 0.026        | 8.56E-02        | 0               | 3.60E-04           |
| rs6874731   | 5:80263865       | G/T      | 0.48 | 0.015 | 0.003 | 1.83E-09 | 23         | 14387     | 0.70 | <b>-0.079</b> | <b>0.033</b> | <b>2.97E-02</b> | 29              | 1.22E-04           |
| rs6452785   | 5:87685500       | C/T      | 0.53 | 0.027 | 0.003 | 4.69E-26 | 23         | 14387     | 0.81 | <b>-0.071</b> | <b>0.033</b> | <b>2.97E-02</b> | 6.7             | 1.90E-04           |
| rs42417     | 5:94198290       | T/C      | 0.69 | 0.017 | 0.003 | 8.27E-10 | 23         | 14387     | 0.57 | -0.042        | 0.026        | 1.01E-01        | 0               | 1.31E-04           |
| rs72780746  | 5:103929588      | T/C      | 0.83 | 0.026 | 0.003 | 2.05E-14 | 23         | 14387     | 0.22 | -0.017        | 0.031        | 5.71E-01        | 0               | 1.27E-04           |
| rs329124    | 5:133865452      | A/G      | 0.57 | 0.016 | 0.003 | 1.96E-10 | 23         | 14387     | 0.40 | -0.038        | 0.028        | 1.68E-01        | 0               | 1.75E-04           |
| rs1385108   | 5:154839646      | T/C      | 0.24 | 0.019 | 0.003 | 3.84E-10 | 23         | 14387     | 0.37 | -0.016        | 0.028        | 5.63E-01        | 0               | 2.35E-04           |
| rs6890961   | 5:166778503      | C/T      | 0.38 | 0.019 | 0.003 | 2.13E-13 | 23         | 14387     | 0.17 | 0.051         | 0.034        | 1.37E-01        | 0               | 2.32E-04           |
| rs4044321   | 5:166989513      | A/G      | 0.36 | 0.023 | 0.003 | 1.75E-17 | 23         | 14387     | 0.59 | 0.020         | 0.027        | 4.68E-01        | 0               | 1.67E-04           |
| rs2173019   | 5:167614971      | A/T      | 0.18 | 0.028 | 0.003 | 2.98E-17 | 23         | 14387     | 0.77 | -0.010        | 0.030        | 7.49E-01        | 0               | 1.50E-04           |
| rs1150668   | 6:28129789       | T/G      | 0.58 | 0.019 | 0.003 | 8.54E-13 | 23         | 14387     | 0.28 | 0.042         | 0.029        | 1.47E-01        | 0               | 1.17E-04           |
| rs3218116   | 6:41901763       | C/T      | 0.74 | 0.020 | 0.003 | 1.05E-11 | 23         | 14387     | 0.47 | -0.060        | 0.034        | 8.30E-02        | 32.5            | 1.85E-04           |
| rs160631    | 6:52895230       | T/G      | 0.27 | 0.017 | 0.003 | 1.87E-09 | 23         | 14387     | 0.26 | 0.001         | 0.029        | 9.68E-01        | 0               | 1.28E-04           |
| rs7743165   | 6:67521222       | G/T      | 0.50 | 0.019 | 0.003 | 4.15E-14 | 23         | 14387     | 0.26 | 0.018         | 0.003        | 3.59E-10        | 0               | 3.59E-04           |
| rs10945141  | 6:69470709       | A/G      | 0.26 | 0.018 | 0.003 | 3.59E-10 | 23         | 14387     | 0.26 | 0.018         | 0.003        | 3.59E-10        | 0               | 3.59E-04           |

| SNP                    | Chr:Pos (GRCh37) | E/A/BA | Exposure |       |       | Courage-PD |           |       |      |               | R <sup>2</sup>  |                 |                    |          |
|------------------------|------------------|--------|----------|-------|-------|------------|-----------|-------|------|---------------|-----------------|-----------------|--------------------|----------|
|                        |                  |        | Beta     | SE    | p     | N studies  | N samples | EAF   | Beta | SE            |                 | p               | I <sup>2</sup> (%) |          |
| rs17554906             | 6:922226609      | C/G    | 0.44     | 0.014 | 0.003 | 3.14E-08   | 23        | 14387 | 0.42 | 0.039         | Excluded for MR | 0               | 1.32E-04           |          |
| rs6568832              | 6:977702876      | A/G    | 0.75     | 0.019 | 0.003 | 1.74E-10   | 23        | 14387 | 0.74 | 0.023         | 5.47E-01        | 28.9            | 1.32E-04           |          |
| rs12195240             | 6:98636905       | A/G    | 0.28     | 0.025 | 0.003 | 1.08E-18   | 23        | 14387 | 0.30 | -0.041        | 1.39E-01        | 0               | 2.53E-04           |          |
| rs6936160              | 6:100347745      | T/C    | 0.70     | 0.020 | 0.003 | 4.20E-13   | 23        | 14387 | 0.69 | 0.018         | 0.028           | 5.17E-01        | 0                  | 1.70E-04 |
| rs118202               | 6:1111658371     | G/T    | 0.19     | 0.037 | 0.003 | 1.90E-29   | 23        | 14387 | 0.19 | -0.060        | 0.043           | 1.63E-01        | 29.2               | 4.12E-04 |
| rs1737329              | 6:163807748      | G/C    | 0.74     | 0.017 | 0.003 | 5.08E-09   | 23        | 14387 | 0.73 | -0.014        | 0.041           | 7.41E-01        | 36.1               | 1.11E-04 |
| rs6948707              | 7:1870794        | G/T    | 0.42     | 0.024 | 0.003 | 4.24E-21   | 23        | 14387 | 0.41 | <0.001        | 0.026           | 9.93E-01        | 11                 | 2.89E-04 |
| rs7809303              | 7:69484366       | G/A    | 0.68     | 0.021 | 0.003 | 3.48E-15   | 23        | 14387 | 0.70 | -0.053        | 0.027           | 5.14E-02        | 0                  | 2.01E-04 |
| rs1030015 <sup>a</sup> | 7:78139581       | T/G    | 0.52     | 0.014 | 0.003 | 2.15E-08   | 23        | 14387 | 0.52 | 0.009         | 0.031           | 7.75E-01        | 23.1               | 1.02E-04 |
| rs4727189              | 7:88442568       | C/T    | 0.34     | 0.015 | 0.003 | 3.00E-08   | 23        | 14387 | 0.36 | 0.031         | 0.027           | 2.40E-01        | 0                  | 9.97E-05 |
| rs11768481             | 7:96629103       | C/A    | 0.66     | 0.019 | 0.003 | 5.23E-12   | 5         | 3107  | 0.53 | 0.031         | Excluded for MR | 0               | 9.97E-05           |          |
| rs13437771             | 7:99071478       | A/G    | 0.84     | 0.027 | 0.004 | 1.39E-14   | 23        | 14387 | 0.85 | -0.012        | 0.036           | 7.27E-01        | 0                  | 1.93E-04 |
| rs10233018             | 7:117523709      | G/A    | 0.52     | 0.025 | 0.003 | 4.77E-22   | 23        | 14387 | 0.50 | 0.014         | 0.026           | 5.76E-01        | 0                  | 3.03E-04 |
| rs10953957             | 7:121954709      | A/G    | 0.39     | 0.014 | 0.003 | 3.66E-08   | 23        | 14387 | 0.39 | 0.036         | 0.027           | 1.77E-01        | 10.3               | 9.84E-05 |
| rs77283305             | 7:132593831      | G/A    | 0.69     | 0.015 | 0.003 | 3.91E-08   | 23        | 14387 | 0.70 | -0.037        | 0.028           | 1.78E-01        | 0                  | 9.80E-05 |
| rs10279261             | 7:133589846      | G/A    | 0.38     | 0.019 | 0.003 | 6.05E-13   | 23        | 14387 | 0.39 | -0.010        | 0.027           | 7.05E-01        | 0                  | 1.68E-04 |
| rs4326350              | 8:10763655       | C/G    | 0.51     | 0.018 | 0.003 | 5.16E-12   | 23        | 14387 | 0.53 | 0.035         | Excluded for MR | 0               | 5.91E-04           |          |
| rs11783093             | 8:27425349       | C/T    | 0.84     | 0.047 | 0.003 | 2.07E-41   | 23        | 14387 | 0.84 | -0.021        | 0.035           | 5.46E-01        | 21.5               | 5.91E-04 |
| rs7836565              | 8:52569449       | C/T    | 0.28     | 0.016 | 0.003 | 4.36E-08   | 23        | 14387 | 0.29 | <b>0.060</b>  | <b>0.029</b>    | <b>3.85E-02</b> | 0                  | 9.74E-05 |
| rs13261666             | 8:59814666       | G/T    | 0.48     | 0.020 | 0.003 | 4.36E-15   | 23        | 14387 | 0.48 | -0.019        | 0.026           | 4.64E-01        | 0                  | 2.00E-04 |
| rs3850736              | 8:64912021       | G/C    | 0.47     | 0.019 | 0.003 | 6.43E-14   | 23        | 14387 | 0.46 | 0.046         | Excluded for MR | 0               | 1.81E-04           |          |
| rs2063976              | 8:91096366       | C/T    | 0.34     | 0.020 | 0.003 | 7.45E-14   | 23        | 14387 | 0.34 | -0.019        | 0.027           | 4.81E-01        | 0                  | 1.81E-04 |
| rs6986430              | 8:93048104       | T/C    | 0.78     | 0.024 | 0.003 | 1.99E-15   | 23        | 14387 | 0.77 | 0.019         | 0.030           | 5.26E-01        | 0                  | 2.05E-04 |
| rs290601               | 8:115374642      | T/C    | 0.27     | 0.016 | 0.003 | 1.14E-08   | 23        | 14387 | 0.27 | -0.003        | 0.029           | 9.19E-01        | 0                  | 1.06E-04 |
| rs3847244              | 9:3025368        | T/C    | 0.47     | 0.019 | 0.003 | 2.60E-13   | 23        | 14387 | 0.48 | -0.026        | 0.027           | 3.34E-01        | 0                  | 1.74E-04 |
| rs11791671             | 9:3398679        | T/C    | 0.07     | 0.028 | 0.005 | 4.24E-08   | 23        | 14387 | 0.07 | 0.019         | 0.073           | 8.00E-01        | 35.7               | 9.74E-05 |
| rs7024924              | 9:8282399        | C/T    | 0.17     | 0.019 | 0.003 | 1.90E-08   | 23        | 14387 | 0.17 | -0.004        | 0.034           | 9.18E-01        | 0                  | 1.03E-04 |
| rs10966092             | 9:23831658       | T/C    | 0.73     | 0.020 | 0.003 | 1.12E-12   | 23        | 14387 | 0.74 | -0.023        | 0.029           | 4.35E-01        | 0                  | 1.64E-04 |
| rs4877285              | 9:81354129       | G/A    | 0.33     | 0.018 | 0.003 | 2.10E-11   | 23        | 14387 | 0.36 | -0.052        | 0.028           | 5.89E-02        | 0                  | 1.46E-04 |
| rs2378662              | 9:86707289       | A/G    | 0.54     | 0.015 | 0.003 | 2.67E-09   | 23        | 14387 | 0.53 | -0.010        | 0.034           | 7.70E-01        | 28.6               | 1.15E-04 |
| rs4837631              | 9:122061948      | C/T    | 0.55     | 0.015 | 0.003 | 2.03E-09   | 23        | 14387 | 0.58 | 0.022         | 0.027           | 4.08E-01        | 0                  | 1.17E-04 |
| rs34553878             | 9:134334588      | G/A    | 0.11     | 0.025 | 0.004 | 1.17E-09   | 15        | 9465  | 0.14 | -0.045        | Excluded for MR | 0               | 1.26E-04           |          |
| rs10858334             | 9:137989785      | G/C    | 0.14     | 0.023 | 0.004 | 1.18E-09   | 23        | 14387 | 0.14 | -0.045        | 0.054           | 4.05E-01        | 37.9               | 1.26E-04 |
| rs7920501              | 10:10043159      | T/A    | 0.54     | 0.016 | 0.003 | 1.25E-09   | 23        | 14387 | 0.53 | 0.031         | Excluded for MR | 0               | 1.05E-04           |          |
| rs1291821              | 10:11133823      | G/A    | 0.53     | 0.014 | 0.003 | 1.39E-08   | 23        | 14387 | 0.54 | -0.015        | 0.026           | 5.60E-01        | 24.1               | 1.05E-04 |
| rs7072776              | 10:22032942      | A/G    | 0.29     | 0.022 | 0.003 | 5.66E-15   | 22        | 13367 | 0.33 | 0.011         | 0.030           | 7.11E-01        | 0                  | 1.98E-04 |
| rs2796793              | 10:36634124      | A/G    | 0.45     | 0.014 | 0.003 | 1.55E-08   | 22        | 13367 | 0.42 | 0.059         | 0.035           | 8.98E-02        | 29.8               | 1.04E-04 |
| rs1733760              | 10:56698174      | C/T    | 0.51     | 0.015 | 0.003 | 6.70E-09   | 23        | 14387 | 0.50 | 0.024         | 0.026           | 3.68E-01        | 0                  | 1.09E-04 |
| rs7921378              | 10:63674885      | G/C    | 0.52     | 0.023 | 0.003 | 6.10E-20   | 23        | 14387 | 0.53 | 0.031         | Excluded for MR | 0               | 1.09E-04           |          |
| rs11594623             | 10:103960351     | C/T    | 0.23     | 0.027 | 0.003 | 7.45E-20   | 23        | 14387 | 0.21 | <b>-0.067</b> | <b>0.031</b>    | <b>3.24E-02</b> | 0                  | 2.70E-04 |
| rs12244388             | 10:104640052     | A/G    | 0.35     | 0.026 | 0.003 | 4.31E-22   | 23        | 14387 | 0.37 | <b>-0.055</b> | <b>0.026</b>    | <b>3.57E-02</b> | 0                  | 3.03E-04 |
| rs10885480             | 10:115378364     | T/C    | 0.72     | 0.019 | 0.003 | 3.83E-11   | 23        | 14387 | 0.73 | -0.014        | 0.029           | 6.46E-01        | 18.9               | 1.42E-04 |
| rs4752018              | 10:118678712     | A/C    | 0.23     | 0.019 | 0.003 | 4.42E-10   | 23        | 14387 | 0.24 | -0.023        | 0.030           | 4.46E-01        | 21.6               | 1.26E-04 |

| SNP                    | Chr:Pos (GRCh37) | Exposure |      |       |       |          | Courage-PD |           |                  |        |       | R <sup>2</sup> |      |                    |  |
|------------------------|------------------|----------|------|-------|-------|----------|------------|-----------|------------------|--------|-------|----------------|------|--------------------|--|
|                        |                  | E/A/BA   | EAF  | Beta  | SE    | p        | N studies  | N samples | EAF              | Beta   | SE    |                | p    | I <sup>2</sup> (%) |  |
| rs9423279              | 10:125680419     | C/G      | 0.36 | 0.019 | 0.003 | 3.06E-12 | 1          | 950       |                  |        |       |                |      |                    |  |
| rs6265 <sup>a</sup>    | 11:27679916      | C/T      | 0.81 | 0.029 | 0.003 | 2.81E-19 | 23         | 14387     | 0.79             | 0.038  | 0.032 | 2.44E-01       | 0    | 2.62E-04           |  |
| rs2939756              | 11:41436297      | G/A      | 0.52 | 0.016 | 0.003 | 7.45E-10 | 23         | 14387     | 0.56             | -0.007 | 0.026 | 7.96E-01       | 5.7  | 1.23E-04           |  |
| rs1381775              | 11:42442826      | T/C      | 0.29 | 0.016 | 0.003 | 2.79E-08 | 23         | 14387     | 0.29             | -0.038 | 0.029 | 1.87E-01       | 0    | 1.00E-04           |  |
| rs61886926             | 11:64133552      | C/T      | 0.62 | 0.018 | 0.003 | 7.30E-12 | 23         | 14387     | 0.64             | -0.004 | 0.035 | 9.05E-01       | 34.3 | 1.52E-04           |  |
| rs644740               | 11:65561468      | C/T      | 0.54 | 0.014 | 0.003 | 3.67E-08 | 23         | 14387     | 0.54             | -0.007 | 0.026 | 7.95E-01       | 0    | 9.84E-05           |  |
| rs7943721              | 11:73309393      | G/A      | 0.17 | 0.021 | 0.003 | 3.58E-10 | 23         | 14387     | NA in COURAGE-PD |        |       |                |      |                    |  |
| rs7929518              | 11:85980958      | G/A      | 0.77 | 0.019 | 0.003 | 2.55E-10 | 23         | 14387     | 0.77             | -0.062 | 0.038 | 1.10E-01       | 27.6 | 1.30E-04           |  |
| rs2155646              | 11:112912811     | C/T      | 0.40 | 0.038 | 0.003 | 9.44E-48 | 23         | 14387     | 0.39             | -0.012 | 0.026 | 6.61E-01       | 0    | 6.85E-04           |  |
| rs1713676 <sup>a</sup> | 11:113660576     | A/G      | 0.48 | 0.017 | 0.003 | 5.38E-11 | 23         | 14387     | 0.46             | 0.034  | 0.026 | 1.96E-01       | 0    | 1.40E-04           |  |
| rs540860               | 11:121530888     | G/A      | 0.54 | 0.018 | 0.003 | 5.75E-12 | 23         | 14387     | 0.52             | 0.038  | 0.026 | 1.40E-01       | 0    | 1.54E-04           |  |
| rs1106363              | 11:131966264     | T/C      | 0.34 | 0.017 | 0.003 | 9.20E-11 | 23         | 14387     | 0.37             | 0.013  | 0.026 | 6.14E-01       | 0    | 1.36E-04           |  |
| rs2010921              | 11:132098205     | A/G      | 0.31 | 0.017 | 0.003 | 2.47E-10 | 23         | 14387     | 0.30             | 0.034  | 0.028 | 2.25E-01       | 0    | 1.30E-04           |  |
| rs11057005             | 12:16748721      | A/G      | 0.56 | 0.016 | 0.003 | 9.12E-10 | 23         | 14387     | 0.58             | -0.034 | 0.038 | 3.73E-01       | 40   | 1.22E-04           |  |
| rs13906                | 12:49952394      | C/T      | 0.89 | 0.025 | 0.004 | 1.98E-09 | 23         | 14387     | 0.89             | 0.019  | 0.042 | 6.56E-01       | 0    | 1.17E-04           |  |
| rs4759229              | 12:56474480      | G/A      | 0.66 | 0.016 | 0.003 | 6.33E-09 | 22         | 14205     | 0.66             | <0.001 | 0.029 | 9.98E-01       | 0    | 1.09E-04           |  |
| rs7969559              | 12:69655167      | A/G      | 0.29 | 0.017 | 0.003 | 1.53E-09 | 23         | 14387     | 0.34             | -0.016 | 0.028 | 5.67E-01       | 6.6  | 1.18E-04           |  |
| rs7134009              | 12:75263193      | T/C      | 0.71 | 0.016 | 0.003 | 4.30E-08 | 23         | 14387     | 0.70             | -0.015 | 0.028 | 5.96E-01       | 0    | 1.02E-04           |  |
| rs77215829             | 12:112618346     | A/C      | 0.87 | 0.024 | 0.004 | 2.02E-10 | 18         | 9799      | 0.87             | 0.005  | 0.051 | 9.25E-01       | 16   | 1.32E-04           |  |
| rs1109480              | 12:121083279     | G/A      | 0.62 | 0.017 | 0.003 | 1.84E-10 | 23         | 14387     | 0.62             | -0.030 | 0.027 | 2.63E-01       | 0    | 1.32E-04           |  |
| rs11611651             | 12:133380790     | A/G      | 0.09 | 0.027 | 0.005 | 2.05E-09 | 23         | 14387     | 0.08             | -0.008 | 0.048 | 8.65E-01       | 0    | 1.17E-04           |  |
| rs17197663             | 13:38172867      | G/A      | 0.88 | 0.022 | 0.004 | 2.06E-08 | 23         | 14387     | 0.87             | 0.030  | 0.038 | 4.30E-01       | 23   | 1.02E-04           |  |
| rs4264267              | 13:38359676      | T/C      | 0.53 | 0.015 | 0.003 | 6.82E-09 | 23         | 14387     | 0.53             | -0.025 | 0.026 | 3.46E-01       | 0    | 1.09E-04           |  |
| rs61959481             | 13:55834929      | G/A      | 0.79 | 0.020 | 0.003 | 7.95E-11 | 23         | 14387     | 0.79             | -0.022 | 0.032 | 4.94E-01       | 0    | 1.37E-04           |  |
| rs55786907             | 13:59871584      | G/A      | 0.16 | 0.019 | 0.003 | 1.84E-08 | 23         | 14387     | 0.17             | 0.021  | 0.034 | 5.41E-01       | 0    | 1.03E-04           |  |
| rs9540731 <sup>a</sup> | 13:66949370      | C/T      | 0.49 | 0.018 | 0.003 | 3.42E-12 | 23         | 14387     | 0.50             | -0.036 | 0.031 | 2.46E-01       | 20.4 | 1.57E-04           |  |
| rs9545155              | 13:80191873      | T/C      | 0.52 | 0.016 | 0.003 | 3.04E-10 | 23         | 14387     | 0.53             | -0.004 | 0.026 | 8.70E-01       | 0    | 1.29E-04           |  |
| rs1772572              | 13:81191176      | C/A      | 0.68 | 0.017 | 0.003 | 5.62E-10 | 23         | 14387     | 0.68             | -0.045 | 0.027 | 9.54E-02       | 0    | 1.25E-04           |  |
| rs1108130              | 13:100648356     | A/T      | 0.21 | 0.024 | 0.003 | 1.57E-14 | 23         | 14387     | 0.20             | -0.022 | 0.033 | 5.06E-01       | 0    | 1.92E-04           |  |
| rs12878369             | 14:28346502      | A/C      | 0.41 | 0.017 | 0.003 | 1.60E-11 | 23         | 14387     | 0.42             | -0.035 | 0.038 | 3.47E-01       | 42.9 | 1.48E-04           |  |
| rs9323328 <sup>a</sup> | 14:58653514      | A/G      | 0.46 | 0.014 | 0.003 | 2.55E-08 | 23         | 14387     | 0.45             | 0.003  | 0.026 | 9.21E-01       | 0    | 1.01E-04           |  |
| rs1811739              | 14:77529375      | A/G      | 0.25 | 0.018 | 0.003 | 5.97E-10 | 23         | 14387     | 0.25             | 0.022  | 0.030 | 4.67E-01       | 0    | 1.25E-04           |  |
| rs8005334              | 14:79563654      | G/T      | 0.36 | 0.017 | 0.003 | 3.44E-10 | 23         | 14387     | 0.35             | -0.016 | 0.027 | 5.55E-01       | 0    | 1.28E-04           |  |
| rs2925128              | 14:98362355      | T/C      | 0.39 | 0.017 | 0.003 | 3.67E-10 | 23         | 14387     | 0.38             | -0.028 | 0.040 | 4.90E-01       | 48.2 | 1.34E-04           |  |
| rs1381287              | 14:98597552      | T/C      | 0.47 | 0.018 | 0.003 | 1.81E-12 | 23         | 14387     | 0.49             | 0.020  | 0.026 | 4.39E-01       | 14.1 | 1.62E-04           |  |
| rs1435672              | 15:36399479      | C/T      | 0.56 | 0.014 | 0.003 | 3.82E-08 | 23         | 14387     | 0.54             | -0.018 | 0.026 | 4.95E-01       | 0    | 9.80E-05           |  |
| rs281296               | 15:47685010      | A/G      | 0.36 | 0.025 | 0.003 | 1.59E-20 | 23         | 14387     | 0.37             | -0.046 | 0.027 | 9.02E-02       | 0    | 2.80E-04           |  |
| rs2289791              | 15:67476952      | G/T      | 0.75 | 0.018 | 0.003 | 2.01E-09 | 10         | 4792      | Excluded for MR  |        |       |                |      |                    |  |
| rs62007780             | 15:78025464      | G/T      | 0.58 | 0.016 | 0.003 | 7.48E-10 | 23         | 14387     | 0.60             | -0.002 | 0.026 | 9.37E-01       | 0    | 1.23E-04           |  |
| rs4310804              | 15:96858409      | C/G      | 0.75 | 0.018 | 0.003 | 7.55E-10 | 20         | 11001     | 0.77             | 0.029  | 0.038 | 4.46E-01       | 24.5 | 1.23E-04           |  |
| rs1139897              | 16:720986        | G/A      | 0.77 | 0.024 | 0.003 | 1.77E-15 | 22         | 14161     | 0.78             | 0.050  | 0.032 | 1.20E-01       | 10.2 | 2.06E-04           |  |
| rs11076962             | 16:5811367       | C/T      | 0.28 | 0.018 | 0.003 | 1.20E-10 | 23         | 14387     | 0.26             | 0.010  | 0.029 | 7.27E-01       | 0    | 1.35E-04           |  |
| rs9922607              | 16:17570220      | C/T      | 0.80 | 0.022 | 0.003 | 3.42E-12 | 23         | 14387     | 0.80             | -0.014 | 0.033 | 6.66E-01       | 0    | 1.57E-04           |  |

| SNP                    | Chr:Pos (GRCh37) | E/A/BA | Exposure |       |       |          | N studies | N samples | Courage-PD       |               |              |                 | R <sup>2</sup> |                    |
|------------------------|------------------|--------|----------|-------|-------|----------|-----------|-----------|------------------|---------------|--------------|-----------------|----------------|--------------------|
|                        |                  |        | EAF      | Beta  | SE    | p        |           |           | EAF              | Beta          | SE           | p               |                | I <sup>2</sup> (%) |
| rs9941217              | 16:18050926      | C/G    | 0.65     | 0.019 | 0.003 | 3.50E-12 | 23        | 14387     | 0.68             | 0.019         | 0.028        | 5.05E-01        | 20.7           | 1.57E-04           |
| rs6497840              | 16:25351633      | A/G    | 0.71     | 0.023 | 0.003 | 2.01E-15 | 23        | 14387     | 0.69             | -0.012        | 0.028        | 6.61E-01        | 4.1            | 2.15E-04           |
| rs12918191             | 16:50945156      | A/G    | 0.76     | 0.020 | 0.003 | 3.14E-11 | 23        | 14387     | 0.76             | -0.004        | 0.030        | 8.95E-01        | 0              | 1.43E-04           |
| rs9302604              | 16:69576894      | G/A    | 0.44     | 0.019 | 0.003 | 3.29E-13 | 23        | 14387     | 0.44             | -0.016        | 0.033        | 6.41E-01        | 26.3           | 1.72E-04           |
| rs117657830            | 16:75766873      | A/G    | 0.96     | 0.038 | 0.006 | 3.18E-09 | 23        | 14387     | 0.96             | 0.003         | 0.066        | 9.64E-01        | 0              | 1.14E-04           |
| rs1050847              | 16:87443734      | C/T    | 0.44     | 0.015 | 0.003 | 7.37E-09 | 23        | 14387     | 0.49             | -0.013        | 0.026        | 6.21E-01        | 11.3           | 1.08E-04           |
| rs11642231             | 16:89608702      | G/A    | 0.63     | 0.016 | 0.003 | 3.44E-09 | 23        | 14387     | 0.68             | <u>0.072</u>  | <b>0.028</b> | <b>1.06E-02</b> | 0              | 1.13E-04           |
| rs4790874              | 17:1995177       | T/C    | 0.53     | 0.017 | 0.003 | 8.43E-12 | 23        | 14387     | 0.54             | -0.035        | 0.026        | 1.85E-01        | 0              | 1.52E-04           |
| rs28441558             | 17:7803118       | T/C    | 0.94     | 0.036 | 0.006 | 1.24E-10 | 16        | 9769      | Excluded for MR  |               |              |                 |                |                    |
| rs6777803              | 17:27323322      | G/T    | 0.83     | 0.025 | 0.003 | 3.18E-13 | 23        | 14387     | 0.84             | -0.014        | 0.035        | 6.79E-01        | 4.8            | 1.72E-04           |
| rs3764351              | 17:37824339      | G/A    | 0.34     | 0.015 | 0.003 | 3.89E-08 | 23        | 14387     | 0.37             | -0.033        | 0.028        | 2.34E-01        | 13.7           | 9.80E-05           |
| rs72836318             | 17:44121579      | T/C    | 0.75     | 0.017 | 0.003 | 7.00E-09 | 23        | 14387     | 0.75             | <b>-0.085</b> | <b>0.030</b> | <b>5.21E-03</b> | 0              | 1.09E-04           |
| rs75919030             | 17:50193197      | T/C    | 0.73     | 0.021 | 0.003 | 3.35E-13 | 23        | 14387     | 0.74             | 0.003         | 0.029        | 9.27E-01        | 0              | 1.72E-04           |
| rs2587507 <sup>a</sup> | 17:77790135      | T/C    | 0.50     | 0.015 | 0.003 | 8.69E-09 | 23        | 14382     | 0.52             | -0.042        | 0.026        | 9.96E-02        | 0              | 1.07E-04           |
| rs34342129             | 18:5872472       | T/C    | 0.49     | 0.014 | 0.003 | 2.13E-08 | 23        | 14387     | 0.50             | -0.038        | 0.026        | 1.45E-01        | 0              | 1.02E-04           |
| rs4476253              | 18:25253297      | G/A    | 0.76     | 0.018 | 0.003 | 5.78E-10 | 23        | 14387     | 0.76             | 0.014         | 0.038        | 7.14E-01        | 26.8           | 1.25E-04           |
| rs8096225              | 18:36921851      | C/A    | 0.70     | 0.016 | 0.003 | 2.63E-08 | 23        | 14387     | 0.70             | -0.006        | 0.028        | 8.23E-01        | 1.4            | 1.01E-04           |
| rs67050670             | 18:39297254      | A/G    | 0.77     | 0.020 | 0.003 | 2.34E-11 | 23        | 14387     | 0.74             | 0.051         | 0.030        | 8.56E-02        | 14.6           | 1.45E-04           |
| rs1373178              | 18:49967811      | T/G    | 0.41     | 0.020 | 0.003 | 4.16E-15 | 23        | 14387     | 0.42             | -0.023        | 0.026        | 3.87E-01        | 0              | 2.00E-04           |
| rs72938304             | 18:53661743      | G/A    | 0.89     | 0.027 | 0.004 | 1.36E-11 | 23        | 14387     | 0.88             | 0.051         | 0.041        | 2.12E-01        | 18.7           | 1.48E-04           |
| rs71367544             | 18:77574374      | T/C    | 0.20     | 0.021 | 0.003 | 8.54E-11 | 23        | 14387     | 0.17             | 0.025         | 0.034        | 4.58E-01        | 0              | 1.37E-04           |
| rs76608582             | 19:4474725       | C/A    | 0.95     | 0.035 | 0.006 | 4.88E-09 | 23        | 14387     | NA in COURAGE-PD |               |              |                 |                |                    |
| rs10853981             | 19:4965064       | A/G    | 0.33     | 0.015 | 0.003 | 4.88E-08 | 23        | 14387     | 0.31             | -0.016        | 0.028        | 5.72E-01        | 1.9            | 9.67E-05           |
| rs113230003            | 19:18460956      | G/A    | 0.74     | 0.019 | 0.003 | 1.05E-10 | 23        | 14387     | 0.76             | 0.055         | 0.031        | 7.61E-02        | 0              | 1.35E-04           |
| rs117734003            | 19:51129745      | C/G    | 0.07     | 0.030 | 0.005 | 2.57E-09 | 15        | 8384      | Excluded for MR  |               |              |                 |                |                    |
| rs1126757 <sup>a</sup> | 19:55879872      | T/C    | 0.47     | 0.014 | 0.003 | 2.92E-08 | 23        | 14369     | 0.47             | -0.001        | 0.029        | 9.68E-01        | 12.9           | 1.00E-04           |
| rs6050446 <sup>d</sup> | 20:25195509      | G/A    | 0.97     | 0.054 | 0.008 | 8.80E-13 | 18        | 12644     | 0.98             | -0.070        | 0.091        | 4.42E-01        | 0              | 2.81E-04           |
| rs6073075              | 20:42015801      | T/A    | 0.18     | 0.019 | 0.003 | 2.44E-08 | 23        | 14387     | 0.20             | -0.008        | 0.033        | 8.05E-01        | 4.9            | 1.01E-04           |
| rs3810496              | 20:62406886      | C/T    | 0.62     | 0.016 | 0.003 | 1.54E-09 | 22        | 14205     | 0.63             | -0.047        | 0.042        | 2.61E-01        | 44.2           | 1.19E-04           |
| rs4818005              | 21:40588819      | G/A    | 0.42     | 0.020 | 0.003 | 1.09E-14 | 23        | 14387     | 0.43             | -0.036        | 0.026        | 1.70E-01        | 0              | 2.03E-04           |
| rs4822102              | 22:42698430      | C/T    | 0.38     | 0.017 | 0.003 | 2.78E-10 | 23        | 14387     | 0.38             | 0.022         | 0.036        | 5.34E-01        | 33.4           | 1.29E-04           |

NA, not available; E/A/BA, effect allele/base allele; EAF, effect allele frequency; SE, standard error.

Bold coefficients with their corresponding SE and p-values are significant at  $p \leq 0.05$ ; those underlined with a solid line are negative and those underlined with a dashed line are positive.

R<sup>2</sup> is the proportion of the variance of the exposure explained by the genetic variant according to the formula:  $2 \times \text{Beta}_{\text{exposure}} \times \text{EAF}_{\text{exposure}} \times (1 - \text{EAF}_{\text{exposure}})$ .

<sup>a</sup> SNPs genotyped.

<sup>b</sup> SNPs associated with both alcohol and coffee consumption.

<sup>c</sup> Proxy SNP used in Courage-PD: rs61857951.

<sup>d</sup> Proxy SNP used in Courage-PD: rs117495226.

**Supplementary Table 4.** SNPs used for Mendelian randomization analyses: individual associations with PD stratified by age and disease duration.

| SNP                                                                | EA/BA | Age ≤ 67y<br>(2,878 cases; 2,944 controls) |              |                 |               | Age > 67y<br>(3,208 cases; 2,728 controls) |                 |                  |               | PD duration ≤ 7y<br>(3,633 cases; 6,836 controls) |                 |               |              | PD duration > 7y<br>(3,271 cases; 6,836 controls) |    |   |  |
|--------------------------------------------------------------------|-------|--------------------------------------------|--------------|-----------------|---------------|--------------------------------------------|-----------------|------------------|---------------|---------------------------------------------------|-----------------|---------------|--------------|---------------------------------------------------|----|---|--|
|                                                                    |       | Beta                                       | SE           | p               |               | Beta                                       | SE              | p                |               | Beta                                              | SE              | p             |              | Beta                                              | SE | p |  |
| <b>Alcohol drinking (per 1-SD increase of ln(drinks per week))</b> |       |                                            |              |                 |               |                                            |                 |                  |               |                                                   |                 |               |              |                                                   |    |   |  |
| rs705687                                                           | G/A   | 0.024                                      | 0.051        | 6.36E-01        | -0.013        | 0.052                                      | 8.09E-01        | Excluded for MR  | 0.033         | 0.040                                             | 4.07E-01        | 0.037         | 0.042        | 3.81E-01                                          |    |   |  |
| rs58107686                                                         | A/C   | -0.014                                     | 0.043        | 7.42E-01        | 0.014         | 0.043                                      | 7.40E-01        | Excluded for MR  | 0.031         | 0.033                                             | 3.60E-01        | -0.010        | 0.036        | 7.72E-01                                          |    |   |  |
| rs12088813                                                         | C/A   | -0.024                                     | 0.065        | 7.11E-01        | 0.026         | 0.046                                      | 5.80E-01        | Excluded for MR  | 0.042         | 0.036                                             | 2.36E-01        | 0.045         | 0.038        | 2.41E-01                                          |    |   |  |
| rs5024204                                                          | A/T   | 0.088                                      | 0.045        | 5.11E-02        | 0.012         | 0.046                                      | 7.90E-01        | Excluded for MR  | 0.042         | 0.035                                             | 2.30E-01        | <b>0.080</b>  | <b>0.037</b> | <b>3.34E-02</b>                                   |    |   |  |
| rs10753661                                                         | A/G   | 0.026                                      | 0.045        | 5.65E-01        | 0.080         | 0.045                                      | 7.70E-02        | Excluded for MR  | 0.032         | 0.035                                             | 3.65E-01        | 0.026         | 0.037        | 4.90E-01                                          |    |   |  |
| rs28680958                                                         | A/G   | -0.013                                     | 0.049        | 7.83E-01        | 0.012         | 0.049                                      | 8.09E-01        | Excluded for MR  | -0.007        | 0.038                                             | 8.60E-01        | 0.019         | 0.040        | 6.39E-01                                          |    |   |  |
| rs823114                                                           | G/A   | <b>-0.082</b>                              | <b>0.041</b> | <b>4.63E-02</b> | 0.002         | 0.042                                      | 9.71E-01        | Excluded for MR  | -0.015        | 0.033                                             | 6.48E-01        | -0.064        | 0.035        | 6.42E-02                                          |    |   |  |
| rs77165542                                                         | T/C   |                                            |              |                 |               |                                            |                 |                  |               |                                                   |                 |               |              |                                                   |    |   |  |
| rs1260326                                                          | T/C   | <b>-0.103</b>                              | <b>0.042</b> | <b>1.35E-02</b> | -0.072        | 0.042                                      | 8.51E-02        | Excluded for MR  | <b>-0.075</b> | <b>0.032</b>                                      | <b>2.05E-02</b> | <b>-0.070</b> | <b>0.035</b> | <b>4.42E-02</b>                                   |    |   |  |
| rs13383034                                                         | C/T   | -0.033                                     | 0.044        | 4.49E-01        | <b>-0.088</b> | <b>0.044</b>                               | <b>4.66E-02</b> | Excluded for MR  | <b>-0.077</b> | <b>0.034</b>                                      | <b>2.46E-02</b> | -0.029        | 0.036        | 4.18E-01                                          |    |   |  |
| rs13032049                                                         | A/G   | 0.049                                      | 0.044        | 2.67E-01        | 0.069         | 0.046                                      | 1.30E-01        | Excluded for MR  | 0.037         | 0.045                                             | 4.12E-01        | 0.055         | 0.038        | 1.44E-01                                          |    |   |  |
| rs828867                                                           | G/A   |                                            |              |                 |               |                                            |                 |                  |               |                                                   |                 |               |              |                                                   |    |   |  |
| rs11692435                                                         | G/A   |                                            |              |                 |               |                                            |                 |                  |               |                                                   |                 |               |              |                                                   |    |   |  |
| rs13024996                                                         | A/C   | 0.064                                      | 0.043        | 1.30E-01        | -0.005        | 0.043                                      | 9.10E-01        | NA in COURAGE-PD | 0.010         | 0.033                                             | 7.54E-01        | 0.022         | 0.035        | 5.37E-01                                          |    |   |  |
| rs72859280                                                         | G/T   |                                            |              |                 |               |                                            |                 |                  |               |                                                   |                 |               |              |                                                   |    |   |  |
| rs56337305                                                         | C/T   | -0.045                                     | 0.042        | 2.84E-01        | -0.014        | 0.042                                      | 7.34E-01        | Excluded for MR  | -0.134        | 0.104                                             | 1.97E-01        | -0.147        | 0.105        | 1.62E-01                                          |    |   |  |
| rs13094887                                                         | T/A   | 0.013                                      | 0.043        | 7.72E-01        | <b>-0.101</b> | <b>0.044</b>                               | <b>2.26E-02</b> | Excluded for MR  | 0.005         | 0.033                                             | 8.76E-01        | -0.039        | 0.035        | 2.64E-01                                          |    |   |  |
| rs62250685                                                         | G/A   | -0.036                                     | 0.041        | 3.82E-01        | -0.014        | 0.042                                      | 7.39E-01        | Excluded for MR  | 0.012         | 0.032                                             | 7.06E-01        | -0.035        | 0.037        | 3.34E-01                                          |    |   |  |
| rs9838144                                                          | C/G   | -0.075                                     | 0.070        | 2.86E-01        | -0.053        | 0.070                                      | 4.47E-01        | Excluded for MR  | -0.029        | 0.041                                             | 4.74E-01        | <b>-0.048</b> | <b>0.034</b> | <b>1.61E-01</b>                                   |    |   |  |
| rs2011092                                                          | C/T   | -0.037                                     | 0.045        | 4.08E-01        | 0.036         | 0.060                                      | 5.50E-01        | Excluded for MR  | 0.026         | 0.035                                             | 5.49E-01        | <b>-0.099</b> | <b>0.042</b> | <b>2.04E-02</b>                                   |    |   |  |
| rs6787172                                                          | G/T   | 0.047                                      | 0.040        | 2.48E-01        | 0.019         | 0.041                                      | 6.35E-01        | Excluded for MR  | 0.012         | 0.031                                             | 6.94E-01        | 0.044         | 0.034        | 1.88E-01                                          |    |   |  |
| rs3748034                                                          | T/G   | -0.071                                     | 0.061        | 2.44E-01        | 0.038         | 0.060                                      | 5.24E-01        | Excluded for MR  | 0.003         | 0.047                                             | 9.51E-01        | 0.009         | 0.049        | 8.53E-01                                          |    |   |  |
| rs11940694                                                         | A/G   | -0.016                                     | 0.058        | 7.86E-01        | -0.029        | 0.042                                      | 4.92E-01        | Excluded for MR  | -0.017        | 0.039                                             | 6.54E-01        | -0.020        | 0.034        | 5.65E-01                                          |    |   |  |
| rs4501255                                                          | C/G   | -0.017                                     | 0.072        | 8.12E-01        | -0.024        | 0.050                                      | 6.24E-01        | Excluded for MR  | 0.005         | 0.038                                             | 8.99E-01        | -0.063        | 0.041        | 1.29E-01                                          |    |   |  |
| rs1229984                                                          | T/C   | -0.092                                     | 0.083        | 2.70E-01        | 0.023         | 0.086                                      | 7.90E-01        | Excluded for MR  | 0.022         | 0.098                                             | 8.23E-01        | -0.056        | 0.077        | 4.66E-01                                          |    |   |  |
| rs2165670                                                          | G/A   | 0.019                                      | 0.075        | 7.99E-01        | 0.114         | 0.118                                      | 3.33E-01        | Excluded for MR  |               |                                                   |                 | 0.008         | 0.059        | 8.92E-01                                          |    |   |  |
| rs13107325                                                         | T/C   | <b>-0.221</b>                              | <b>0.081</b> | <b>6.28E-03</b> | -0.012        | 0.093                                      | 8.95E-01        | Excluded for MR  | <b>-0.122</b> | <b>0.062</b>                                      | <b>4.81E-02</b> | -0.040        | 0.068        | 5.58E-01                                          |    |   |  |
| rs4690727                                                          | C/G   | -0.016                                     | 0.045        | 7.21E-01        | -0.016        | 0.046                                      | 7.30E-01        | Excluded for MR  | <b>-0.043</b> | 0.035                                             | 2.22E-01        | 0.043         | 0.038        | 2.52E-01                                          |    |   |  |
| rs12651313                                                         | G/C   |                                            |              |                 |               |                                            |                 |                  |               |                                                   |                 |               |              |                                                   |    |   |  |
| rs4916723                                                          | C/A   | -0.051                                     | 0.056        | 3.56E-01        | -0.056        | 0.044                                      | 1.97E-01        | Excluded for MR  | -0.023        | 0.034                                             | 4.87E-01        | -0.056        | 0.036        | 1.13E-01                                          |    |   |  |
| rs12655091                                                         | A/G   | -0.013                                     | 0.041        | 7.56E-01        | 0.005         | 0.053                                      | 9.24E-01        | Excluded for MR  | -0.035        | 0.032                                             | 2.76E-01        | -0.022        | 0.034        | 5.24E-01                                          |    |   |  |
| rs55872084                                                         | G/T   | 0.085                                      | 0.050        | 9.28E-02        | -0.014        | 0.051                                      | 7.87E-01        | Excluded for MR  | 0.019         | 0.039                                             | 6.35E-01        | -0.021        | 0.041        | 6.17E-01                                          |    |   |  |
| rs6460047                                                          | T/C   | 0.019                                      | 0.053        | 7.27E-01        | -0.001        | 0.069                                      | 9.93E-01        | Excluded for MR  | -0.003        | 0.041                                             | 9.41E-01        | -0.034        | 0.043        | 4.23E-01                                          |    |   |  |
| rs10236149                                                         | G/A   | 0.058                                      | 0.060        | 3.29E-01        | 0.039         | 0.061                                      | 5.15E-01        | Excluded for MR  | 0.086         | 0.046                                             | 6.46E-02        | 0.045         | 0.051        | 3.77E-01                                          |    |   |  |
| rs35034355                                                         | A/G   | 0.009                                      | 0.040        | 8.24E-01        | -0.015        | 0.041                                      | 7.19E-01        | Excluded for MR  | -0.011        | 0.032                                             | 7.22E-01        | -0.013        | 0.034        | 7.10E-01                                          |    |   |  |
| rs6951574                                                          | T/C   | -0.007                                     | 0.042        | 8.71E-01        | -0.008        | 0.042                                      | 8.42E-01        | Excluded for MR  | -0.030        | 0.033                                             | 3.52E-01        | 0.030         | 0.035        | 3.87E-01                                          |    |   |  |
| rs13250583                                                         | T/C   | -0.022                                     | 0.052        | 6.80E-01        | -0.009        | 0.053                                      | 8.68E-01        | Excluded for MR  | -0.018        | 0.041                                             | 6.55E-01        | -0.009        | 0.043        | 8.37E-01                                          |    |   |  |

| SNP                                           | E/A/BA | Age ≤ 67y<br>(2,878 cases; 2,944 controls) |              |                 |               | Age > 67y<br>(3,208 cases; 2,728 controls) |                 |                 |              | PD duration ≤ 7y<br>(3,633 cases; 6,836 controls) |                 |              |                 | PD duration > 7y<br>(3,271 cases; 6,836 controls) |    |   |  |
|-----------------------------------------------|--------|--------------------------------------------|--------------|-----------------|---------------|--------------------------------------------|-----------------|-----------------|--------------|---------------------------------------------------|-----------------|--------------|-----------------|---------------------------------------------------|----|---|--|
|                                               |        | Beta                                       | SE           | p               |               | Beta                                       | SE              | p               |              | Beta                                              | SE              | p            |                 | Beta                                              | SE | p |  |
|                                               |        |                                            |              |                 |               |                                            |                 |                 |              |                                                   |                 |              |                 |                                                   |    |   |  |
| rs1217091                                     | T/C    | 0.049                                      | 0.052        | 3.51E-01        | 0.090         | 0.054                                      | 9.42E-02        | Excluded for MR | <b>0.090</b> | <b>0.041</b>                                      | <b>2.72E-02</b> | 0.063        | 0.043           | 1.45E-01                                          |    |   |  |
| rs28601761                                    | C/G    | -0.051                                     | 0.048        | 2.87E-01        | 0.002         | 0.049                                      | 9.70E-01        | Excluded for MR | -0.014       | 0.037                                             | 7.17E-01        | -0.020       | 0.040           | 6.15E-01                                          |    |   |  |
| rs55932213                                    | A/G    | 0.017                                      | 0.052        | 7.39E-01        | 0.004         | 0.071                                      | 9.50E-01        | 0.008           | 0.045        | 8.54E-01                                          | 0.028           | 0.042        | 5.09E-01        |                                                   |    |   |  |
| rs10978550                                    | C/T    | 0.014                                      | 0.068        | 8.41E-01        | 0.001         | 0.047                                      | 9.81E-01        | 0.033           | 0.036        | 3.65E-01                                          | -0.013          | 0.039        | 7.35E-01        |                                                   |    |   |  |
| rs7074871                                     | A/G    | 0.033                                      | 0.059        | 5.78E-01        | 0.002         | 0.058                                      | 9.68E-01        | 0.061           | 0.058        | 2.91E-01                                          | -0.039          | 0.049        | 4.30E-01        |                                                   |    |   |  |
| rs17665139                                    | T/C    | -0.039                                     | 0.042        | 3.50E-01        | 0.011         | 0.043                                      | 7.96E-01        | -0.020          | 0.042        | 6.35E-01                                          | -0.038          | 0.035        | 2.74E-01        |                                                   |    |   |  |
| rs11030084                                    | T/C    | -0.059                                     | 0.051        | 2.48E-01        | 0.020         | 0.052                                      | 7.04E-01        | -0.031          | 0.040        | 4.42E-01                                          | -0.024          | 0.043        | 5.80E-01        |                                                   |    |   |  |
| rs56030824                                    | A/G    | 0.016                                      | 0.043        | 7.06E-01        | <0.001        | 0.044                                      | 9.92E-01        | <0.001          | 0.048        | 9.94E-01                                          | 0.050           | 0.036        | 1.63E-01        |                                                   |    |   |  |
| rs10750025                                    | C/T    | 0.008                                      | 0.045        | 8.67E-01        | -0.056        | 0.044                                      | 2.02E-01        | -0.025          | 0.034        | 4.62E-01                                          | 0.004           | 0.040        | 9.13E-01        |                                                   |    |   |  |
| rs4938230                                     | C/A    | -0.053                                     | 0.041        | 1.99E-01        | -0.012        | 0.041                                      | 7.72E-01        | -0.038          | 0.035        | 2.73E-01                                          | -0.017          | 0.034        | 6.14E-01        |                                                   |    |   |  |
| rs682011                                      | T/C    | -0.002                                     | 0.044        | 9.60E-01        | -0.034        | 0.044                                      | 4.40E-01        | 0.018           | 0.034        | 6.06E-01                                          | -0.043          | 0.036        | 2.34E-01        |                                                   |    |   |  |
| rs12795042                                    | C/A    | -0.014                                     | 0.043        | 7.52E-01        | -0.034        | 0.044                                      | 4.38E-01        | -0.054          | 0.034        | 1.10E-01                                          | 0.010           | 0.046        | 8.30E-01        |                                                   |    |   |  |
| rs3809162                                     | A/G    | 0.054                                      | 0.041        | 1.84E-01        | -0.013        | 0.041                                      | 7.55E-01        | 0.036           | 0.032        | 2.53E-01                                          | -0.013          | 0.034        | 7.10E-01        |                                                   |    |   |  |
| rs10506274                                    | T/G    | -0.020                                     | 0.042        | 6.27E-01        | 0.012         | 0.043                                      | 7.80E-01        | 0.002           | 0.033        | 9.57E-01                                          | -0.002          | 0.035        | 9.52E-01        |                                                   |    |   |  |
| rs4842786                                     | A/G    | <0.001                                     | 0.046        | 9.98E-01        | 0.026         | 0.048                                      | 5.91E-01        | 0.037           | 0.036        | 3.03E-01                                          | -0.045          | 0.039        | 2.50E-01        |                                                   |    |   |  |
| rs500321                                      | T/A    | 0.024                                      | 0.064        | 7.06E-01        | -0.066        | 0.044                                      | 1.34E-01        | -0.059          | 0.034        | 8.19E-02                                          | 0.002           | 0.036        | 9.56E-01        |                                                   |    |   |  |
| rs1123285                                     | G/C    | -0.022                                     | 0.056        | 6.93E-01        | -0.011        | 0.072                                      | 8.75E-01        | -0.077          | 0.046        | 9.74E-02                                          | -0.021          | 0.045        | 6.43E-01        |                                                   |    |   |  |
| rs28929474                                    | T/C    | -0.016                                     | 0.041        | 6.94E-01        | 0.039         | 0.042                                      | 3.51E-01        | 0.045           | 0.032        | 1.65E-01                                          | -0.010          | 0.034        | 7.59E-01        |                                                   |    |   |  |
| rs2472297                                     | C/T    | -0.035                                     | 0.074        | 6.35E-01        | -0.001        | 0.079                                      | 9.90E-01        | -0.020          | 0.059        | 7.30E-01                                          | -0.015          | 0.064        | 8.18E-01        |                                                   |    |   |  |
| rs12907323                                    | A/G    | -0.036                                     | 0.043        | 4.02E-01        | 0.006         | 0.043                                      | 8.93E-01        | -0.034          | 0.033        | 3.07E-01                                          | -0.038          | 0.035        | 2.76E-01        |                                                   |    |   |  |
| rs17177078                                    | T/C    | <b>0.119</b>                               | <b>0.053</b> | <b>2.42E-02</b> | 0.071         | 0.053                                      | 1.81E-01        | <b>0.098</b>    | <b>0.041</b> | <b>1.76E-02</b>                                   | 0.053           | 0.044        | 2.27E-01        |                                                   |    |   |  |
| rs378421                                      | A/G    | -0.019                                     | 0.042        | 6.57E-01        | 0.024         | 0.044                                      | 5.87E-01        | 0.005           | 0.048        | 9.21E-01                                          | -0.046          | 0.035        | 1.98E-01        |                                                   |    |   |  |
| rs62044525                                    | G/C    | 0.037                                      | 0.053        | 4.91E-01        | -0.004        | 0.052                                      | 9.40E-01        | 0.018           | 0.050        | 7.18E-01                                          | -0.001          | 0.043        | 9.75E-01        |                                                   |    |   |  |
| rs1104608                                     | C/G    | <b>0.088</b>                               | <b>0.044</b> | <b>4.55E-02</b> | 0.019         | 0.046                                      | 6.78E-01        | <b>0.076</b>    | <b>0.037</b> | <b>4.14E-02</b>                                   | -0.018          | 0.039        | 6.37E-01        |                                                   |    |   |  |
| rs4548913                                     | A/G    | -0.023                                     | 0.041        | 5.82E-01        | -0.011        | 0.042                                      | 7.96E-01        | 0.027           | 0.035        | 4.48E-01                                          | 0.061           | 0.037        | 1.00E-01        |                                                   |    |   |  |
| rs3803800                                     | A/G    | 0.052                                      | 0.058        | 3.67E-01        | 0.038         | 0.042                                      | 3.57E-01        | -0.040          | 0.032        | 2.18E-01                                          | 0.019           | 0.035        | 5.89E-01        |                                                   |    |   |  |
| rs2854334                                     | A/G    | 0.042                                      | 0.043        | 3.27E-01        | 0.063         | 0.043                                      | 1.48E-01        | 0.054           | 0.032        | 9.22E-02                                          | -0.013          | 0.034        | 6.96E-01        |                                                   |    |   |  |
| rs10438820                                    | C/T    | <b>-0.162</b>                              | <b>0.051</b> | <b>1.56E-03</b> | <b>-0.116</b> | <b>0.051</b>                               | <b>2.41E-02</b> | 0.050           | 0.033        | 1.33E-01                                          | 0.011           | 0.036        | 7.65E-01        |                                                   |    |   |  |
| rs9950000                                     | T/C    | 0.052                                      | 0.042        | 1.73E-01        | -0.094        | 0.055                                      | 8.85E-02        | <b>-0.118</b>   | <b>0.040</b> | <b>3.19E-03</b>                                   | <b>-0.144</b>   | <b>0.058</b> | <b>1.34E-02</b> |                                                   |    |   |  |
| rs4092465                                     | G/A    | 0.042                                      | 0.043        | 4.76E-01        | 0.083         | 0.072                                      | 2.48E-01        | 0.054           | 0.032        | 9.22E-02                                          | -0.013          | 0.034        | 6.96E-01        |                                                   |    |   |  |
| rs281379                                      | G/A    | 0.042                                      | 0.043        | 3.27E-01        | 0.063         | 0.043                                      | 1.48E-01        | 0.050           | 0.033        | 1.33E-01                                          | 0.011           | 0.036        | 7.65E-01        |                                                   |    |   |  |
| rs4815364                                     | G/A    | <b>-0.162</b>                              | <b>0.051</b> | <b>1.56E-03</b> | <b>-0.116</b> | <b>0.051</b>                               | <b>2.41E-02</b> | 0.050           | 0.033        | 1.33E-01                                          | 0.011           | 0.036        | 7.65E-01        |                                                   |    |   |  |
| rs9607814                                     | A/C    | 0.067                                      | 0.066        | 3.07E-01        | 0.002         | 0.066                                      | 9.76E-01        | 0.020           | 0.052        | 6.95E-01                                          | 0.082           | 0.053        | 1.18E-01        |                                                   |    |   |  |
| <b>Coffee drinking (per ln(cups per day))</b> |        |                                            |              |                 |               |                                            |                 |                 |              |                                                   |                 |              |                 |                                                   |    |   |  |
| rs574367                                      | T/G    | -0.105                                     | 0.077        | 1.73E-01        | -0.094        | 0.055                                      | 8.85E-02        | <b>-0.148</b>   | <b>0.061</b> | <b>1.43E-02</b>                                   | -0.103          | 0.061        | 9.03E-02        |                                                   |    |   |  |
| rs10865548                                    | G/A    | -0.037                                     | 0.052        | 4.76E-01        | 0.083         | 0.072                                      | 2.48E-01        | -0.005          | 0.040        | 9.10E-01                                          | 0.032           | 0.044        | 4.66E-01        |                                                   |    |   |  |
| rs1260326                                     | C/T    | <b>0.103</b>                               | <b>0.042</b> | <b>1.35E-02</b> | 0.072         | 0.042                                      | 8.51E-02        | <b>0.075</b>    | <b>0.032</b> | <b>2.05E-02</b>                                   | <b>0.070</b>    | <b>0.035</b> | <b>4.42E-02</b> |                                                   |    |   |  |
| rs4410790                                     | C/T    | -0.027                                     | 0.042        | 5.17E-01        | 0.008         | 0.043                                      | 8.48E-01        | -0.030          | 0.044        | 4.94E-01                                          | -0.008          | 0.035        | 8.24E-01        |                                                   |    |   |  |
| rs34060476                                    | G/A    | 0.067                                      | 0.066        | 3.07E-01        | 0.002         | 0.066                                      | 9.76E-01        | 0.020           | 0.052        | 6.95E-01                                          | 0.082           | 0.053        | 1.18E-01        |                                                   |    |   |  |

| SNP                    | E/A/B/A | Age ≤ 67y                     |              |                 |              | Age > 67y                     |                 |              |              | PD duration ≤ 7y              |              |              |                 | PD duration > 7y              |    |   |  |
|------------------------|---------|-------------------------------|--------------|-----------------|--------------|-------------------------------|-----------------|--------------|--------------|-------------------------------|--------------|--------------|-----------------|-------------------------------|----|---|--|
|                        |         | (2,878 cases; 2,944 controls) |              |                 |              | (3,208 cases; 2,728 controls) |                 |              |              | (3,633 cases; 6,836 controls) |              |              |                 | (3,271 cases; 6,836 controls) |    |   |  |
|                        |         | Beta                          | SE           | p               |              | Beta                          | SE              | p            |              | Beta                          | SE           | p            |                 | Beta                          | SE | p |  |
| rs1057868              | T/C     | 0.005                         | 0.061        | 9.28E-01        | 0.031        | 0.045                         | 4.86E-01        | 0.019        | 0.035        | 5.93E-01                      | 0.031        | 0.037        | 4.02E-01        |                               |    |   |  |
| rs597045               | A/T     | 0.011                         | 0.044        | 7.99E-01        | -0.015       | 0.045                         | 7.39E-01        | -0.039       | 0.050        | 4.40E-01                      | 0.006        | 0.037        | 6.64E-01        |                               |    |   |  |
| rs1956218              | G/A     | -0.048                        | 0.041        | 2.45E-01        | 0.002        | 0.041                         | 9.61E-01        | -0.036       | 0.032        | 2.59E-01                      | -0.026       | 0.034        | 4.51E-01        |                               |    |   |  |
| rs2472297              | T/C     | 0.022                         | 0.056        | 6.93E-01        | 0.011        | 0.072                         | 8.75E-01        | 0.077        | 0.046        | 9.74E-02                      | 0.021        | 0.045        | 6.43E-01        |                               |    |   |  |
| rs66723169             | A/C     | -0.004                        | 0.049        | 9.38E-01        | -0.057       | 0.050                         | 2.53E-01        | 0.005        | 0.038        | 8.91E-01                      | -0.057       | 0.041        | 1.64E-01        |                               |    |   |  |
| rs2330783              | G/T     |                               |              |                 |              |                               |                 |              |              |                               |              |              |                 |                               |    |   |  |
| Excluded for MR        |         |                               |              |                 |              |                               |                 |              |              |                               |              |              |                 |                               |    |   |  |
| Lifetime smoking index |         |                               |              |                 |              |                               |                 |              |              |                               |              |              |                 |                               |    |   |  |
| rs1193237              | C/G     |                               |              |                 |              |                               |                 |              |              |                               |              |              |                 |                               |    |   |  |
| rs4949465              | C/T     | -0.007                        | 0.064        | 9.13E-01        | 0.004        | 0.064                         | 9.54E-01        | 0.016        | 0.049        | 7.50E-01                      | 0.010        | 0.052        | 8.48E-01        |                               |    |   |  |
| rs549845               | G/A     | -0.102                        | 0.066        | 1.19E-01        | 0.030        | 0.045                         | 5.05E-01        | -0.060       | 0.046        | 1.93E-01                      | -0.046       | 0.047        | 3.27E-01        |                               |    |   |  |
| rs1933270              | T/G     | 0.044                         | 0.042        | 3.00E-01        | 0.020        | 0.042                         | 6.34E-01        | 0.038        | 0.033        | 2.49E-01                      | <b>0.075</b> | <b>0.035</b> | <b>3.33E-02</b> |                               |    |   |  |
| rs7528604              | G/A     | 0.018                         | 0.040        | 6.57E-01        | -0.005       | 0.041                         | 9.01E-01        | 0.007        | 0.032        | 8.13E-01                      | 0.014        | 0.042        | 7.39E-01        |                               |    |   |  |
| rs11210229             | A/G     | -0.041                        | 0.042        | 3.19E-01        | -0.005       | 0.042                         | 9.08E-01        | -0.015       | 0.032        | 6.43E-01                      | -0.008       | 0.035        | 8.21E-01        |                               |    |   |  |
| rs7553348              | G/A     | 0.003                         | 0.042        | 9.41E-01        | -0.018       | 0.043                         | 6.65E-01        | 0.008        | 0.033        | 8.07E-01                      | 0.008        | 0.035        | 8.29E-01        |                               |    |   |  |
| rs10922907             | A/T     |                               |              |                 |              |                               |                 |              |              |                               |              |              |                 |                               |    |   |  |
| rs1931263              | T/G     | 0.010                         | 0.041        | 8.15E-01        | -0.048       | 0.041                         | 2.47E-01        | -0.027       | 0.032        | 3.91E-01                      | -0.041       | 0.034        | 2.28E-01        |                               |    |   |  |
| rs7519626              | C/T     | 0.007                         | 0.044        | 8.68E-01        | 0.001        | 0.044                         | 9.84E-01        | -0.015       | 0.044        | 7.30E-01                      | 0.035        | 0.036        | 3.32E-01        |                               |    |   |  |
| rs9435340              | T/A     |                               | NA           |                 | -0.010       | 0.044                         | 8.16E-01        | 0.002        | 0.034        | 9.44E-01                      | 0.019        | 0.036        | 5.96E-01        |                               |    |   |  |
| rs10918701             | G/A     | 0.004                         | 0.042        | 9.15E-01        | -0.077       | 0.042                         | 6.64E-02        | 0.002        | 0.043        | 9.54E-01                      | -0.018       | 0.035        | 6.11E-01        |                               |    |   |  |
| rs2867112              | T/G     | -0.044                        | 0.054        | 4.11E-01        | 0.095        | 0.074                         | 1.99E-01        | -0.002       | 0.042        | 9.67E-01                      | 0.028        | 0.045        | 5.42E-01        |                               |    |   |  |
| rs6741228              | T/C     | -0.021                        | 0.057        | 7.13E-01        | 0.035        | 0.042                         | 4.02E-01        | -0.025       | 0.032        | 4.38E-01                      | 0.009        | 0.034        | 7.82E-01        |                               |    |   |  |
| rs6213536              | C/T     |                               |              |                 |              |                               |                 |              |              |                               |              |              |                 |                               |    |   |  |
| rs7569203              | C/A     | 0.025                         | 0.044        | 5.65E-01        | <b>0.093</b> | <b>0.044</b>                  | <b>3.61E-02</b> | <b>0.073</b> | <b>0.034</b> | <b>3.18E-02</b>               | 0.029        | 0.036        | 4.31E-01        |                               |    |   |  |
| rs13016665             | A/C     | 0.006                         | 0.042        | 8.87E-01        | <b>0.103</b> | <b>0.043</b>                  | <b>1.58E-02</b> | 0.046        | 0.033        | 1.61E-01                      | 0.042        | 0.035        | 2.34E-01        |                               |    |   |  |
| rs4671357              | C/T     | 0.002                         | 0.042        | 9.70E-01        | 0.001        | 0.041                         | 9.74E-01        | 0.018        | 0.032        | 5.84E-01                      | -0.030       | 0.036        | 3.99E-01        |                               |    |   |  |
| rs359243               | C/T     | -0.031                        | 0.042        | 4.70E-01        | 0.050        | 0.043                         | 2.49E-01        | 0.047        | 0.042        | 2.65E-01                      | -0.031       | 0.047        | 5.06E-01        |                               |    |   |  |
| rs2678670              | A/T     |                               |              |                 |              |                               |                 |              |              |                               |              |              |                 |                               |    |   |  |
| rs62155874             | G/A     | 0.003                         | 0.062        | 9.66E-01        | -0.069       | 0.063                         | 2.71E-01        | -0.032       | 0.049        | 5.15E-01                      | -0.006       | 0.052        | 9.08E-01        |                               |    |   |  |
| rs3811038              | C/T     | -0.049                        | 0.046        | 2.84E-01        | -0.008       | 0.061                         | 8.91E-01        | 0.001        | 0.036        | 9.82E-01                      | -0.011       | 0.038        | 7.74E-01        |                               |    |   |  |
| rs2890772              | T/G     | 0.006                         | 0.041        | 8.91E-01        | 0.040        | 0.042                         | 3.38E-01        | 0.013        | 0.032        | 6.87E-01                      | -0.004       | 0.034        | 9.00E-01        |                               |    |   |  |
| rs62175972             | T/C     | 0.075                         | 0.111        | 5.03E-01        | 0.016        | 0.111                         | 8.82E-01        | 0.093        | 0.087        | 2.85E-01                      | -0.009       | 0.090        | 9.19E-01        |                               |    |   |  |
| rs3769949              | A/T     |                               |              |                 |              |                               |                 |              |              |                               |              |              |                 |                               |    |   |  |
| rs13009008             | A/G     | 0.057                         | 0.042        | 1.77E-01        | 0.046        | 0.043                         | 2.84E-01        | 0.008        | 0.033        | 8.02E-01                      | <b>0.079</b> | <b>0.036</b> | <b>2.72E-02</b> |                               |    |   |  |
| rs4473348              | T/A     | 0.006                         | 0.048        | 8.95E-01        | -0.085       | 0.049                         | 8.13E-02        | -0.071       | 0.037        | 5.79E-02                      | -0.014       | 0.040        | 7.24E-01        |                               |    |   |  |
| rs12623702             | G/A     | -0.035                        | 0.042        | 4.06E-01        | -0.012       | 0.043                         | 7.74E-01        | -0.028       | 0.033        | 3.92E-01                      | -0.054       | 0.035        | 1.26E-01        |                               |    |   |  |
| rs6779302              | T/G     | 0.032                         | 0.042        | 4.51E-01        | 0.049        | 0.043                         | 2.55E-01        | 0.047        | 0.033        | 1.59E-01                      | 0.011        | 0.035        | 7.45E-01        |                               |    |   |  |
| rs6778080              | T/C     | -0.014                        | 0.046        | 7.67E-01        | 0.005        | 0.047                         | 9.20E-01        | 0.005        | 0.042        | 8.97E-01                      | -0.023       | 0.038        | 5.52E-01        |                               |    |   |  |
| rs775758               | A/T     |                               |              |                 |              |                               |                 |              |              |                               |              |              |                 |                               |    |   |  |
| rs421983               | T/C     | -0.029                        | 0.040        | 4.71E-01        | 0.020        | 0.041                         | 6.25E-01        | 0.007        | 0.031        | 8.30E-01                      | -0.004       | 0.034        | 9.16E-01        |                               |    |   |  |
| rs326341               | G/A     | <b>-0.086</b>                 | <b>0.042</b> | <b>3.86E-02</b> | 0.025        | 0.042                         | 5.50E-01        | -0.028       | 0.032        | 3.89E-01                      | -0.005       | 0.034        | 8.73E-01        |                               |    |   |  |

| SNP         | E/A/B/A | Age ≤ 67y<br>(2,878 cases; 2,944 controls) |       |          |        | Age > 67y<br>(3,208 cases; 2,728 controls) |          |                 |       | PD duration ≤ 7y<br>(3,633 cases; 6,836 controls) |        |       |          | PD duration > 7y<br>(3,271 cases; 6,836 controls) |    |   |  |
|-------------|---------|--------------------------------------------|-------|----------|--------|--------------------------------------------|----------|-----------------|-------|---------------------------------------------------|--------|-------|----------|---------------------------------------------------|----|---|--|
|             |         | Beta                                       | SE    | p        |        | Beta                                       | SE       | p               |       | Beta                                              | SE     | p     |          | Beta                                              | SE | p |  |
|             |         |                                            |       |          |        |                                            |          |                 |       |                                                   |        |       |          |                                                   |    |   |  |
| rs73220544  | C/A     | -0.086                                     | 0.060 | 1.50E-01 | -0.050 | 0.085                                      | 5.54E-01 | -0.037          | 0.047 | 4.26E-01                                          | -0.114 | 0.050 | 2.21E-02 |                                                   |    |   |  |
| rs9842947   | T/C     | 0.026                                      | 0.046 | 5.79E-01 | 0.020  | 0.046                                      | 6.69E-01 | 0.020           | 0.036 | 5.77E-01                                          | 0.045  | 0.038 | 2.39E-01 |                                                   |    |   |  |
| rs624833    | T/G     | -0.046                                     | 0.045 | 2.97E-01 | -0.088 | 0.063                                      | 1.62E-01 | -0.113          | 0.034 | 1.02E-03                                          | -0.039 | 0.047 | 4.06E-01 |                                                   |    |   |  |
| rs61796681  | T/A     | 0.068                                      | 0.078 | 3.85E-01 | 0.065  | 0.080                                      | 4.15E-01 | 0.074           | 0.061 | 2.27E-01                                          | -0.007 | 0.066 | 9.17E-01 |                                                   |    |   |  |
| rs317021    | A/T     | 0.007                                      | 0.075 | 9.23E-01 | 0.049  | 0.057                                      | 3.91E-01 | 0.093           | 0.044 | 3.50E-02                                          | 0.012  | 0.046 | 7.94E-01 |                                                   |    |   |  |
| rs72678864  | G/A     | 0.050                                      | 0.057 | 3.86E-01 | 0.015  | 0.060                                      | 7.96E-01 | 0.065           | 0.046 | 1.54E-01                                          | -0.008 | 0.048 | 8.68E-01 |                                                   |    |   |  |
| rs17576594  | G/A     | -0.059                                     | 0.046 | 2.01E-01 | -0.009 | 0.047                                      | 8.42E-01 | -0.026          | 0.036 | 4.67E-01                                          | -0.063 | 0.038 | 9.77E-02 |                                                   |    |   |  |
| rs11948770  | C/T     | -0.026                                     | 0.049 | 6.00E-01 | -0.045 | 0.049                                      | 3.57E-01 | -0.017          | 0.038 | 6.52E-01                                          | -0.091 | 0.040 | 2.52E-02 |                                                   |    |   |  |
| rs71627581  | G/A     |                                            |       |          |        |                                            |          | Excluded for MR |       |                                                   |        |       |          |                                                   |    |   |  |
| rs10052591  | T/C     | 0.036                                      | 0.041 | 3.74E-01 | -0.008 | 0.041                                      | 8.45E-01 | 0.005           | 0.032 | 8.73E-01                                          | 0.059  | 0.034 | 8.25E-02 |                                                   |    |   |  |
| rs2080870   | A/T     | 0.067                                      | 0.047 | 1.50E-01 | 0.080  | 0.048                                      | 9.20E-02 | 0.086           | 0.037 | 1.91E-02                                          | 0.051  | 0.039 | 1.95E-01 |                                                   |    |   |  |
| rs4571506   | C/T     | -0.072                                     | 0.052 | 1.67E-01 | 0.004  | 0.058                                      | 9.44E-01 | -0.019          | 0.036 | 5.95E-01                                          | -0.076 | 0.034 | 2.58E-02 |                                                   |    |   |  |
| rs4957528   | C/A     |                                            |       |          |        |                                            |          | Excluded for MR |       |                                                   |        |       |          |                                                   |    |   |  |
| rs329120    | C/T     | -0.056                                     | 0.042 | 1.78E-01 | -0.034 | 0.042                                      | 4.12E-01 | -0.070          | 0.032 | 2.94E-02                                          | 0.009  | 0.034 | 7.96E-01 |                                                   |    |   |  |
| rs986391    | G/A     | -0.005                                     | 0.043 | 9.07E-01 | -0.022 | 0.044                                      | 6.22E-01 | -0.019          | 0.034 | 5.67E-01                                          | -0.042 | 0.036 | 2.46E-01 |                                                   |    |   |  |
| rs13153393  | G/A     | 0.046                                      | 0.102 | 6.54E-01 | 0.052  | 0.065                                      | 4.22E-01 | 0.002           | 0.071 | 9.75E-01                                          | 0.134  | 0.054 | 1.30E-02 |                                                   |    |   |  |
| rs245774    | G/A     | -0.060                                     | 0.046 | 1.88E-01 | -0.054 | 0.046                                      | 2.40E-01 | -0.094          | 0.035 | 8.18E-03                                          | 0.004  | 0.039 | 9.08E-01 |                                                   |    |   |  |
| rs6935954   | A/G     | 0.021                                      | 0.042 | 6.24E-01 | 0.012  | 0.043                                      | 7.77E-01 | -0.019          | 0.043 | 6.52E-01                                          | 0.084  | 0.035 | 1.57E-02 |                                                   |    |   |  |
| rs2254710   | C/A     | 0.028                                      | 0.073 | 7.05E-01 | 0.055  | 0.051                                      | 2.87E-01 | 0.022           | 0.039 | 5.78E-01                                          | 0.041  | 0.041 | 3.18E-01 |                                                   |    |   |  |
| rs2894808   | A/T     | 0.034                                      | 0.067 | 6.09E-01 | -0.020 | 0.071                                      | 7.74E-01 | 0.004           | 0.054 | 9.36E-01                                          | 0.043  | 0.057 | 4.55E-01 |                                                   |    |   |  |
| rs12202536  | G/A     | -0.043                                     | 0.041 | 2.99E-01 | -0.106 | 0.042                                      | 1.11E-02 | -0.068          | 0.032 | 3.45E-02                                          | -0.067 | 0.034 | 4.87E-02 |                                                   |    |   |  |
| rs7766610   | C/A     | -0.101                                     | 0.074 | 1.71E-01 | -0.044 | 0.055                                      | 4.18E-01 | -0.090          | 0.042 | 3.33E-02                                          | -0.014 | 0.067 | 8.34E-01 |                                                   |    |   |  |
| rs1922018   | C/T     | 0.010                                      | 0.043 | 8.22E-01 | 0.001  | 0.044                                      | 9.77E-01 | -0.004          | 0.033 | 8.98E-01                                          | 0.009  | 0.035 | 8.06E-01 |                                                   |    |   |  |
| rs10226228  | G/A     | -0.050                                     | 0.042 | 2.31E-01 | -0.035 | 0.044                                      | 4.32E-01 | -0.024          | 0.033 | 4.67E-01                                          | -0.033 | 0.036 | 3.61E-01 |                                                   |    |   |  |
| rs11768481  | C/A     |                                            |       |          |        |                                            |          | Excluded for MR |       |                                                   |        |       |          |                                                   |    |   |  |
| rs6962772   | A/G     | -0.059                                     | 0.057 | 2.95E-01 | -0.019 | 0.057                                      | 7.36E-01 | -0.058          | 0.044 | 1.90E-01                                          | -0.026 | 0.047 | 5.80E-01 |                                                   |    |   |  |
| rs10282292  | C/T     | -0.026                                     | 0.043 | 5.40E-01 | 0.027  | 0.050                                      | 5.95E-01 | 0.006           | 0.033 | 8.52E-01                                          | 0.005  | 0.038 | 8.99E-01 |                                                   |    |   |  |
| rs2401924   | G/C     |                                            |       |          |        |                                            |          | Excluded for MR |       |                                                   |        |       |          |                                                   |    |   |  |
| rs7807019   | G/A     | 0.013                                      | 0.041 | 7.56E-01 | 0.004  | 0.042                                      | 9.21E-01 | -0.006          | 0.032 | 8.59E-01                                          | 0.044  | 0.034 | 1.98E-01 |                                                   |    |   |  |
| rs6957896   | T/C     | -0.027                                     | 0.052 | 6.07E-01 | -0.039 | 0.052                                      | 4.57E-01 | -0.040          | 0.047 | 3.97E-01                                          | -0.022 | 0.040 | 5.86E-01 |                                                   |    |   |  |
| rs4731925   | T/C     | -0.014                                     | 0.044 | 7.50E-01 | -0.042 | 0.044                                      | 3.42E-01 | 0.026           | 0.045 | 5.54E-01                                          | -0.084 | 0.036 | 2.07E-02 |                                                   |    |   |  |
| rs35169606  | T/G     |                                            |       |          |        |                                            |          | Excluded for MR |       |                                                   |        |       |          |                                                   |    |   |  |
| rs11783093  | C/T     | -0.004                                     | 0.080 | 9.61E-01 | 0.011  | 0.055                                      | 8.47E-01 | 0.010           | 0.043 | 8.19E-01                                          | -0.048 | 0.057 | 4.02E-01 |                                                   |    |   |  |
| rs2062882   | A/G     | 0.007                                      | 0.042 | 8.71E-01 | -0.024 | 0.041                                      | 5.56E-01 | -0.007          | 0.035 | 8.41E-01                                          | -0.054 | 0.044 | 2.21E-01 |                                                   |    |   |  |
| rs72674867  | A/T     | 0.033                                      | 0.045 | 4.70E-01 | 0.042  | 0.047                                      | 3.75E-01 | 0.028           | 0.036 | 4.42E-01                                          | -0.017 | 0.048 | 7.16E-01 |                                                   |    |   |  |
| rs4543592   | C/T     | -0.036                                     | 0.041 | 3.84E-01 | -0.071 | 0.042                                      | 9.30E-02 | -0.023          | 0.033 | 4.74E-01                                          | -0.036 | 0.034 | 2.91E-01 |                                                   |    |   |  |
| rs7039819   | G/A     | -0.009                                     | 0.043 | 8.27E-01 | 0.002  | 0.043                                      | 9.58E-01 | 0.010           | 0.033 | 7.74E-01                                          | -0.001 | 0.036 | 9.69E-01 |                                                   |    |   |  |
| rs1246265   | C/T     | 0.061                                      | 0.043 | 1.76E-01 | -0.006 | 0.045                                      | 8.95E-01 | 0.011           | 0.035 | 7.42E-01                                          | -0.005 | 0.037 | 8.98E-01 |                                                   |    |   |  |
| rs1221148   | C/G     | 0.056                                      | 0.043 | 1.89E-01 | 0.030  | 0.055                                      | 5.93E-01 | 0.050           | 0.034 | 1.34E-01                                          | -0.031 | 0.035 | 3.86E-01 |                                                   |    |   |  |
| rs13296519  | T/G     | -0.016                                     | 0.059 | 7.89E-01 | -0.044 | 0.043                                      | 3.01E-01 | -0.020          | 0.033 | 5.53E-01                                          | -0.010 | 0.035 | 7.76E-01 |                                                   |    |   |  |
| rs113382419 | A/C     | 0.037                                      | 0.068 | 5.87E-01 | -0.045 | 0.070                                      | 5.21E-01 | 0.036           | 0.054 | 5.01E-01                                          | -0.073 | 0.060 | 2.24E-01 |                                                   |    |   |  |



| SNP         | EA/BA | Age ≤ 67y<br>(2,878 cases; 2,944 controls) |              |                 |              | Age > 67y<br>(3,208 cases; 2,728 controls) |                 |               |              | PD duration ≤ 7y<br>(3,633 cases; 6,836 controls) |               |              |                 | PD duration > 7y<br>(3,271 cases; 6,836 controls) |    |   |  |
|-------------|-------|--------------------------------------------|--------------|-----------------|--------------|--------------------------------------------|-----------------|---------------|--------------|---------------------------------------------------|---------------|--------------|-----------------|---------------------------------------------------|----|---|--|
|             |       | Beta                                       | SE           | p               |              | Beta                                       | SE              | p             |              | Beta                                              | SE            | p            |                 | Beta                                              | SE | p |  |
|             |       |                                            |              |                 |              |                                            |                 |               |              |                                                   |               |              |                 |                                                   |    |   |  |
| rs11255908  | G/T   | 0.008                                      | 0.045        | 8.66E-01        | -0.036       | 0.048                                      | 4.45E-01        | -0.014        | 0.036        | 6.93E-01                                          | 0.027         | 0.039        | 4.92E-01        |                                                   |    |   |  |
| rs2675638   | G/A   | 0.014                                      | 0.064        | 8.32E-01        | 0.014        | 0.042                                      | 7.48E-01        | -0.040        | 0.033        | 2.19E-01                                          | -0.010        | 0.037        | 7.88E-01        |                                                   |    |   |  |
| rs10823968  | A/T   | 0.002                                      | 0.044        | 9.55E-01        | 0.029        | 0.044                                      | 4.98E-01        | 0.028         | 0.034        | 4.09E-01                                          | -0.010        | 0.036        | 7.76E-01        |                                                   |    |   |  |
| rs61857951  | C/A   |                                            |              | Excluded for MR |              |                                            |                 |               |              |                                                   |               |              |                 |                                                   |    |   |  |
| rs7077678   | C/T   | -0.010                                     | 0.041        | 8.09E-01        | -0.020       | 0.043                                      | 6.42E-01        | -0.013        | 0.033        | 6.97E-01                                          | 0.007         | 0.035        | 8.40E-01        |                                                   |    |   |  |
| rs12244388  | A/G   | <b>-0.098</b>                              | <b>0.042</b> | <b>2.00E-02</b> | -0.048       | 0.042                                      | 2.57E-01        | <b>-0.086</b> | <b>0.033</b> | <b>8.52E-03</b>                                   | -0.036        | 0.035        | 2.95E-01        |                                                   |    |   |  |
| rs3896224   | A/G   | 0.028                                      | 0.042        | 5.08E-01        | -0.019       | 0.042                                      | 6.57E-01        | -0.006        | 0.032        | 8.55E-01                                          | 0.004         | 0.034        | 9.12E-01        |                                                   |    |   |  |
| rs34866095  | G/A   | <b>-0.101</b>                              | <b>0.044</b> | <b>2.38E-02</b> | -0.051       | 0.045                                      | 2.49E-01        | -0.020        | 0.034        | 5.70E-01                                          | <b>-0.085</b> | <b>0.037</b> | <b>2.27E-02</b> |                                                   |    |   |  |
| rs75742406  | G/A   | -0.050                                     | 0.049        | 3.10E-01        | -0.063       | 0.051                                      | 2.19E-01        | -0.033        | 0.039        | 4.01E-01                                          | -0.052        | 0.050        | 2.97E-01        |                                                   |    |   |  |
| rs17309874  | A/G   | -0.059                                     | 0.051        | 2.45E-01        | -0.032       | 0.051                                      | 5.30E-01        | -0.054        | 0.039        | 1.67E-01                                          | 0.003         | 0.041        | 9.48E-01        |                                                   |    |   |  |
| rs4391802   | A/G   | 0.003                                      | 0.045        | 9.41E-01        | <b>0.113</b> | <b>0.046</b>                               | <b>1.34E-02</b> | 0.051         | 0.035        | 1.51E-01                                          | 0.050         | 0.038        | 1.85E-01        |                                                   |    |   |  |
| rs112282219 | A/G   | -0.061                                     | 0.108        | 5.69E-01        |              |                                            | Excluded for MR | 0.022         | 0.087        | 7.97E-01                                          | 0.051         | 0.091        | 5.75E-01        |                                                   |    |   |  |
| rs9919670   | A/G   | -0.019                                     | 0.042        | 6.49E-01        | -0.028       | 0.042                                      | 5.09E-01        | -0.019        | 0.033        | 5.69E-01                                          | -0.013        | 0.035        | 7.17E-01        |                                                   |    |   |  |
| rs74086911  | G/A   | <b>-0.201</b>                              | <b>0.079</b> | <b>1.13E-02</b> | 0.116        | 0.083                                      | 1.60E-01        | 0.006         | 0.063        | 9.21E-01                                          | <b>-0.134</b> | <b>0.065</b> | <b>3.97E-02</b> |                                                   |    |   |  |
| rs7297175   | C/T   | 0.042                                      | 0.043        | 3.25E-01        | -0.044       | 0.044                                      | 3.16E-01        | 0.011         | 0.034        | 7.40E-01                                          | 0.029         | 0.036        | 4.21E-01        |                                                   |    |   |  |
| rs10879871  | G/T   | 0.045                                      | 0.043        | 2.95E-01        | -0.046       | 0.044                                      | 2.99E-01        | -0.003        | 0.034        | 9.34E-01                                          | -0.005        | 0.036        | 8.85E-01        |                                                   |    |   |  |
| rs12831617  | T/C   | -0.033                                     | 0.045        | 4.66E-01        | 0.047        | 0.047                                      | 3.18E-01        | 0.029         | 0.036        | 4.27E-01                                          | 0.021         | 0.039        | 5.84E-01        |                                                   |    |   |  |
| rs6562474   | C/G   | 0.001                                      | 0.043        | 9.72E-01        | 0.041        | 0.043                                      | 3.45E-01        | 0.024         | 0.033        | 4.64E-01                                          | -0.010        | 0.035        | 7.73E-01        |                                                   |    |   |  |
| rs7333559   | G/A   | -0.064                                     | 0.053        | 2.26E-01        | -0.027       | 0.052                                      | 6.06E-01        | -0.079        | 0.041        | 5.14E-02                                          | 0.009         | 0.055        | 8.73E-01        |                                                   |    |   |  |
| rs860326    | C/T   | 0.049                                      | 0.063        | 4.35E-01        | -0.023       | 0.043                                      | 5.97E-01        | 0.011         | 0.033        | 7.32E-01                                          | -0.030        | 0.035        | 3.95E-01        |                                                   |    |   |  |
| rs7155595   | C/A   | 0.009                                      | 0.045        | 8.44E-01        | 0.021        | 0.045                                      | 6.35E-01        | -0.008        | 0.035        | 8.11E-01                                          | 0.004         | 0.048        | 9.26E-01        |                                                   |    |   |  |
| rs3742365   | C/T   | -0.012                                     | 0.043        | 7.80E-01        | 0.015        | 0.043                                      | 7.33E-01        | 0.001         | 0.033        | 9.72E-01                                          | 0.013         | 0.035        | 7.09E-01        |                                                   |    |   |  |
| rs35175834  | A/G   | -0.027                                     | 0.049        | 5.78E-01        | -0.062       | 0.050                                      | 2.13E-01        | -0.036        | 0.038        | 3.55E-01                                          | -0.037        | 0.041        | 3.68E-01        |                                                   |    |   |  |
| rs28485305  | C/T   | 0.036                                      | 0.042        | 3.86E-01        | 0.001        | 0.042                                      | 9.87E-01        | 0.058         | 0.033        | 7.68E-02                                          | -0.040        | 0.035        | 2.41E-01        |                                                   |    |   |  |
| rs8042849   | C/T   | -0.035                                     | 0.043        | 4.26E-01        | 0.053        | 0.043                                      | 2.23E-01        | 0.032         | 0.034        | 3.33E-01                                          | -0.041        | 0.036        | 2.60E-01        |                                                   |    |   |  |
| rs8042134   | G/T   | 0.009                                      | 0.056        | 8.79E-01        | 0.067        | 0.042                                      | 1.11E-01        | 0.041         | 0.033        | 2.07E-01                                          | 0.026         | 0.035        | 4.49E-01        |                                                   |    |   |  |
| rs6598539   | C/T   | <0.001                                     | 0.042        | 9.98E-01        | -0.017       | 0.042                                      | 6.94E-01        | -0.021        | 0.033        | 5.27E-01                                          | -0.013        | 0.047        | 7.88E-01        |                                                   |    |   |  |
| rs11861214  | G/T   | 0.011                                      | 0.051        | 8.31E-01        | 0.050        | 0.052                                      | 3.35E-01        | 0.047         | 0.040        | 2.42E-01                                          | 0.044         | 0.042        | 2.91E-01        |                                                   |    |   |  |
| rs12708665  | G/A   | <0.001                                     | 0.044        | 9.99E-01        | -0.065       | 0.045                                      | 1.51E-01        | -0.038        | 0.035        | 2.68E-01                                          | 0.009         | 0.037        | 8.18E-01        |                                                   |    |   |  |
| rs57611503  | G/A   |                                            |              | Excluded for MR |              |                                            |                 | <b>-0.111</b> | <b>0.036</b> | <b>2.14E-03</b>                                   | -0.080        | 0.049        | 9.86E-02        |                                                   |    |   |  |
| rs889398    | C/T   |                                            |              | Excluded for MR |              |                                            |                 | 0.019         | 0.061        | 7.52E-01                                          | 0.019         | 0.060        | 7.47E-01        |                                                   |    |   |  |
| rs60952428  | T/C   |                                            |              | Excluded for MR |              |                                            |                 |               |              |                                                   |               |              |                 |                                                   |    |   |  |
| rs1050847   | C/T   | 0.006                                      | 0.042        | 8.81E-01        | -0.014       | 0.043                                      | 7.39E-01        | 0.019         | 0.033        | 5.69E-01                                          | <b>-0.074</b> | <b>0.035</b> | <b>3.51E-02</b> |                                                   |    |   |  |
| rs369230    | T/G   | -0.019                                     | 0.048        | 6.94E-01        | -0.057       | 0.049                                      | 2.47E-01        | -0.036        | 0.038        | 3.44E-01                                          | -0.044        | 0.050        | 3.75E-01        |                                                   |    |   |  |
| rs8614      | A/C   | <b>0.141</b>                               | <b>0.059</b> | <b>1.65E-02</b> | 0.011        | 0.061                                      | 8.52E-01        | <b>0.098</b>  | <b>0.046</b> | <b>3.27E-02</b>                                   | 0.064         | 0.048        | 1.86E-01        |                                                   |    |   |  |
| rs732083    | G/A   | -0.041                                     | 0.044        | 3.57E-01        | -0.015       | 0.045                                      | 7.45E-01        | -0.035        | 0.035        | 3.06E-01                                          | -0.031        | 0.037        | 4.04E-01        |                                                   |    |   |  |
| rs9904288   | T/C   | -0.016                                     | 0.045        | 7.19E-01        | -0.038       | 0.046                                      | 4.13E-01        | -0.037        | 0.035        | 2.92E-01                                          | -0.007        | 0.038        | 8.61E-01        |                                                   |    |   |  |
| rs67596067  | A/G   | -0.026                                     | 0.043        | 5.42E-01        | 0.047        | 0.044                                      | 2.86E-01        | 0.008         | 0.034        | 8.12E-01                                          | 0.035         | 0.036        | 3.31E-01        |                                                   |    |   |  |
| rs12967855  | A/G   | <b>-0.102</b>                              | <b>0.044</b> | <b>2.06E-02</b> | 0.010        | 0.045                                      | 8.31E-01        | -0.052        | 0.035        | 1.33E-01                                          | 0.002         | 0.037        | 9.47E-01        |                                                   |    |   |  |
| rs62098013  | A/G   | 0.067                                      | 0.044        | 1.22E-01        | 0.025        | 0.044                                      | 5.78E-01        | <b>0.102</b>  | <b>0.034</b> | <b>2.81E-03</b>                                   | -0.014        | 0.050        | 7.77E-01        |                                                   |    |   |  |
| rs71367545  | A/G   | -0.063                                     | 0.054        | 2.41E-01        | 0.077        | 0.055                                      | 1.63E-01        | -0.014        | 0.043        | 7.40E-01                                          | 0.062         | 0.044        | 1.64E-01        |                                                   |    |   |  |

| SNP                                                                                | E/A/B/A | Age ≤ 67y                     |              |                 |               | Age > 67y                     |                 |                  |              | PD duration ≤ 7y              |                 |              |              | PD duration > 7y              |    |   |  |
|------------------------------------------------------------------------------------|---------|-------------------------------|--------------|-----------------|---------------|-------------------------------|-----------------|------------------|--------------|-------------------------------|-----------------|--------------|--------------|-------------------------------|----|---|--|
|                                                                                    |         | (2,878 cases; 2,944 controls) |              |                 |               | (3,208 cases; 2,728 controls) |                 |                  |              | (3,633 cases; 6,836 controls) |                 |              |              | (3,271 cases; 6,836 controls) |    |   |  |
|                                                                                    |         | Beta                          | SE           | p               |               | Beta                          | SE              | p                |              | Beta                          | SE              | p            |              | Beta                          | SE | p |  |
| rs76608582                                                                         | C/A     | 0.030                         | 0.069        | 6.64E-01        | 0.068         | 0.050                         | 1.76E-01        | NA in COURAGE-PD | 0.037        | 0.039                         | 3.46E-01        | 0.040        | 0.041        | 3.31E-01                      |    |   |  |
| rs35343344                                                                         | C/A     | -0.008                        | 0.048        | 8.62E-01        | -0.043        | 0.049                         | 3.80E-01        |                  | 0.013        | 0.038                         | 7.35E-01        | -0.079       | 0.040        | 4.76E-02                      |    |   |  |
| rs4814873                                                                          | C/T     | 0.034                         | 0.053        | 5.18E-01        | -0.061        | 0.053                         | 2.42E-01        |                  | -0.032       | 0.041                         | 4.40E-01        | 0.003        | 0.042        | 9.52E-01                      |    |   |  |
| rs6119897                                                                          | A/G     | -0.010                        | 0.048        | 8.38E-01        | -0.080        | 0.048                         | 9.98E-02        |                  | -0.041       | 0.038                         | 2.71E-01        | -0.013       | 0.040        | 7.43E-01                      |    |   |  |
| rs12481282                                                                         | C/G     | -0.024                        | 0.043        | 5.77E-01        | -0.005        | 0.043                         | 9.07E-01        |                  | -0.037       | 0.044                         | 4.06E-01        | 0.009        | 0.035        | 8.03E-01                      |    |   |  |
| rs348809                                                                           | G/A     | -0.107                        | 0.072        | 1.38E-01        | 0.042         | 0.051                         | 4.17E-01        |                  | -0.056       | 0.040                         | 1.63E-01        | 0.036        | 0.042        | 3.96E-01                      |    |   |  |
| rs6011779                                                                          | C/T     | -0.072                        | 0.060        | 2.31E-01        | 0.053         | 0.060                         | 3.76E-01        |                  | -0.024       | 0.047                         | 6.03E-01        | -0.032       | 0.050        | 5.20E-01                      |    |   |  |
| rs147412694                                                                        | A/G     | 0.037                         | 0.044        | 3.97E-01        | -0.013        | 0.059                         | 8.27E-01        |                  | 0.003        | 0.035                         | 9.26E-01        | 0.038        | 0.050        | 4.41E-01                      |    |   |  |
| rs2838834                                                                          | T/C     | 0.034                         | 0.051        | 5.04E-01        | <b>-0.114</b> | <b>0.052</b>                  | <b>2.98E-02</b> |                  | -0.035       | 0.040                         | 3.85E-01        | -0.025       | 0.042        | 5.52E-01                      |    |   |  |
| rs136233                                                                           | G/A     | <b>0.172</b>                  | <b>0.051</b> | <b>7.11E-04</b> | 0.100         | 0.067                         | 1.37E-01        |                  | <b>0.121</b> | <b>0.039</b>                  | <b>2.13E-03</b> | <b>0.138</b> | <b>0.055</b> | <b>1.17E-02</b>               |    |   |  |
| rs202645                                                                           | G/A     | <b>0.172</b>                  | <b>0.051</b> | <b>7.11E-04</b> | 0.100         | 0.067                         | 1.37E-01        |                  | <b>0.121</b> | <b>0.039</b>                  | <b>2.13E-03</b> | <b>0.138</b> | <b>0.055</b> | <b>1.17E-02</b>               |    |   |  |
| <b>Smoking initiation (per 1-SD increase in the of prevalence of ever smoking)</b> |         |                               |              |                 |               |                               |                 |                  |              |                               |                 |              |              |                               |    |   |  |
| rs12130857                                                                         | G/A     | -0.028                        | 0.043        | 5.16E-01        | -0.009        | 0.045                         | 8.38E-01        |                  | -0.038       | 0.034                         | 2.70E-01        | 0.003        | 0.037        | 9.43E-01                      |    |   |  |
| rs3820277                                                                          | G/T     | -0.036                        | 0.041        | 3.79E-01        | -0.041        | 0.057                         | 4.74E-01        |                  | -0.042       | 0.048                         | 3.83E-01        | -0.035       | 0.034        | 3.02E-01                      |    |   |  |
| rs1889571                                                                          | G/T     | -0.002                        | 0.065        | 9.81E-01        | 0.009         | 0.065                         | 8.91E-01        |                  | 0.030        | 0.050                         | 5.48E-01        | 0.011        | 0.053        | 8.27E-01                      |    |   |  |
| rs10914684                                                                         | G/A     | 0.010                         | 0.043        | 8.11E-01        | -0.023        | 0.044                         | 5.93E-01        |                  | -0.039       | 0.034                         | 2.45E-01        | 0.006        | 0.036        | 8.72E-01                      |    |   |  |
| rs951740                                                                           | A/G     | -0.109                        | 0.059        | 6.57E-02        | 0.033         | 0.043                         | 4.44E-01        |                  | -0.039       | 0.033                         | 2.43E-01        | -0.055       | 0.046        | 2.28E-01                      |    |   |  |
| rs12022778                                                                         | C/A     | 0.068                         | 0.052        | 1.93E-01        | -0.012        | 0.054                         | 8.26E-01        |                  | 0.042        | 0.041                         | 3.11E-01        | 0.078        | 0.061        | 2.05E-01                      |    |   |  |
| rs4912332                                                                          | T/C     | 0.074                         | 0.057        | 1.95E-01        | 0.036         | 0.042                         | 3.91E-01        |                  | <b>0.084</b> | <b>0.032</b>                  | <b>8.77E-03</b> | -0.031       | 0.034        | 3.67E-01                      |    |   |  |
| rs80054503                                                                         | T/C     | 0.074                         | 0.057        | 1.95E-01        | 0.036         | 0.042                         | 3.91E-01        |                  | <b>0.084</b> | <b>0.032</b>                  | <b>8.77E-03</b> | -0.031       | 0.034        | 3.67E-01                      |    |   |  |
| rs10789369                                                                         | A/G     | -0.046                        | 0.042        | 2.72E-01        | -0.047        | 0.043                         | 2.74E-01        |                  | -0.034       | 0.033                         | 2.93E-01        | -0.018       | 0.035        | 5.99E-01                      |    |   |  |
| rs1514176                                                                          | G/A     | -0.001                        | 0.042        | 9.82E-01        | 0.023         | 0.055                         | 6.72E-01        |                  | 0.005        | 0.033                         | 8.82E-01        | 0.014        | 0.035        | 6.99E-01                      |    |   |  |
| rs11162019                                                                         | C/T     | -0.010                        | 0.043        | 8.17E-01        | -0.031        | 0.044                         | 4.86E-01        |                  | -0.016       | 0.034                         | 6.38E-01        | -0.034       | 0.036        | 3.45E-01                      |    |   |  |
| rs1008078                                                                          | T/C     | -0.052                        | 0.041        | 2.07E-01        | 0.047         | 0.042                         | 2.61E-01        |                  | -0.038       | 0.041                         | 3.54E-01        | 0.008        | 0.055        | 8.86E-01                      |    |   |  |
| rs12027999                                                                         | T/C     | -0.007                        | 0.067        | 9.15E-01        | 0.096         | 0.086                         | 2.67E-01        |                  | 0.028        | 0.052                         | 5.98E-01        | -0.009       | 0.056        | 8.70E-01                      |    |   |  |
| rs45444697                                                                         | G/C     | -0.013                        | 0.053        | 8.02E-01        | -0.011        | 0.075                         | 8.78E-01        |                  | -0.016       | 0.042                         | 6.98E-01        | 0.005        | 0.043        | 9.04E-01                      |    |   |  |
| rs2901785                                                                          | G/A     | 0.041                         | 0.054        | 4.44E-01        | 0.004         | 0.053                         | 9.37E-01        |                  | 0.052        | 0.045                         | 2.47E-01        | -0.015       | 0.034        | 6.67E-01                      |    |   |  |
| rs147052174                                                                        | T/G     |                               |              |                 |               |                               |                 | Excluded for MR  |              |                               |                 |              |              |                               |    |   |  |
| rs35656245                                                                         | A/G     | 0.006                         | 0.044        | 8.97E-01        | -0.019        | 0.045                         | 6.79E-01        |                  | -0.006       | 0.046                         | 8.90E-01        | -0.007       | 0.037        | 8.44E-01                      |    |   |  |
| rs12739243                                                                         | T/C     | 0.003                         | 0.048        | 9.44E-01        | -0.017        | 0.050                         | 7.41E-01        |                  | 0.035        | 0.038                         | 3.65E-01        | 0.013        | 0.040        | 7.50E-01                      |    |   |  |
| rs876793                                                                           | T/C     | 0.034                         | 0.045        | 4.43E-01        | 0.084         | 0.045                         | 6.08E-02        |                  | 0.005        | 0.051                         | 9.27E-01        | <b>0.074</b> | <b>0.037</b> | <b>4.37E-02</b>               |    |   |  |
| rs6731872                                                                          | G/T     | -0.026                        | 0.051        | 6.20E-01        | 0.058         | 0.053                         | 2.71E-01        |                  | 0.005        | 0.040                         | 9.04E-01        | 0.029        | 0.044        | 5.08E-01                      |    |   |  |
| rs1022376                                                                          | T/C     | 0.020                         | 0.041        | 6.25E-01        | 0.015         | 0.042                         | 7.27E-01        |                  | -0.005       | 0.032                         | 8.74E-01        | 0.023        | 0.035        | 5.12E-01                      |    |   |  |
| rs61533748                                                                         | C/T     | -0.011                        | 0.057        | 8.50E-01        | 0.042         | 0.043                         | 3.29E-01        |                  | -0.020       | 0.034                         | 5.53E-01        | 0.021        | 0.036        | 5.53E-01                      |    |   |  |
| rs2710634                                                                          | T/C     | -0.035                        | 0.041        | 4.02E-01        | -0.031        | 0.042                         | 4.52E-01        |                  | 0.027        | 0.032                         | 4.00E-01        | -0.054       | 0.034        | 1.12E-01                      |    |   |  |
| rs7598402                                                                          | C/G     |                               |              |                 |               |                               |                 | Excluded for MR  |              |                               |                 |              |              |                               |    |   |  |
| rs10490159                                                                         | T/C     | -0.009                        | 0.041        | 8.29E-01        | <b>-0.124</b> | <b>0.055</b>                  | <b>2.37E-02</b> |                  | -0.006       | 0.032                         | 8.42E-01        | -0.061       | 0.034        | 7.61E-02                      |    |   |  |
| rs359247                                                                           | T/A     | -0.009                        | 0.042        | 8.32E-01        | 0.022         | 0.043                         | 6.13E-01        |                  | 0.020        | 0.033                         | 5.49E-01        | -0.025       | 0.035        | 4.88E-01                      |    |   |  |
| rs12714017                                                                         | C/T     | 0.042                         | 0.041        | 3.10E-01        | -0.018        | 0.042                         | 6.76E-01        |                  | -0.019       | 0.032                         | 5.63E-01        | 0.059        | 0.034        | 8.36E-02                      |    |   |  |
| rs13392222                                                                         | A/C     | 0.067                         | 0.065        | 3.01E-01        | 0.005         | 0.088                         | 9.54E-01        |                  | 0.022        | 0.050                         | 6.57E-01        | -0.032       | 0.052        | 5.34E-01                      |    |   |  |

| SNP         | E/A/B/A | Age ≤ 67y<br>(2,878 cases; 2,944 controls) |              |                 |               | Age > 67y<br>(3,208 cases; 2,728 controls) |                 |                 |              | PD duration ≤ 7y<br>(3,633 cases; 6,836 controls) |               |              |                 | PD duration > 7y<br>(3,271 cases; 6,836 controls) |    |   |  |  |
|-------------|---------|--------------------------------------------|--------------|-----------------|---------------|--------------------------------------------|-----------------|-----------------|--------------|---------------------------------------------------|---------------|--------------|-----------------|---------------------------------------------------|----|---|--|--|
|             |         | Beta                                       | SE           | p               |               | Beta                                       | SE              | p               |              | Beta                                              | SE            | p            |                 | Beta                                              | SE | p |  |  |
|             |         |                                            |              |                 |               |                                            |                 |                 |              |                                                   |               |              |                 |                                                   |    |   |  |  |
| rs1901477   | G/A     | -0.031                                     | 0.041        | 4.48E-01        | 0.047         | 0.041                                      | 2.57E-01        | <0.001          | 0.043        | 9.94E-01                                          | 0.034         | 0.050        | 5.03E-01        |                                                   |    |   |  |  |
| rs3811038   | C/T     | -0.049                                     | 0.046        | 2.84E-01        | -0.008        | 0.061                                      | 8.91E-01        | 0.001           | 0.036        | 9.82E-01                                          | -0.011        | 0.038        | 7.74E-01        |                                                   |    |   |  |  |
| rs34399632  | G/A     | 0.050                                      | 0.059        | 3.98E-01        | -0.026        | 0.084                                      | 7.58E-01        | 0.001           | 0.059        | 9.81E-01                                          | -0.052        | 0.046        | 2.50E-01        |                                                   |    |   |  |  |
| rs6756212   | C/T     | -0.022                                     | 0.041        | 5.97E-01        | 0.027         | 0.041                                      | 5.15E-01        | -0.015          | 0.032        | 6.33E-01                                          | -0.015        | 0.034        | 6.52E-01        |                                                   |    |   |  |  |
| rs16826827  | T/C     | -0.003                                     | 0.065        | 9.68E-01        | -0.086        | 0.064                                      | 1.79E-01        | -0.054          | 0.049        | 2.77E-01                                          | -0.017        | 0.052        | 7.41E-01        |                                                   |    |   |  |  |
| rs1445649   | C/T     | 0.005                                      | 0.041        | 9.11E-01        | -0.059        | 0.041                                      | 1.51E-01        | -0.014          | 0.032        | 6.50E-01                                          | -0.033        | 0.034        | 3.25E-01        |                                                   |    |   |  |  |
| rs12474587  | T/G     | 0.081                                      | 0.042        | 5.53E-02        | 0.019         | 0.043                                      | 6.63E-01        | 0.062           | 0.033        | 6.28E-02                                          | 0.021         | 0.035        | 5.59E-01        |                                                   |    |   |  |  |
| rs13007361  | A/G     | 0.047                                      | 0.072        | 5.12E-01        | 0.007         | 0.049                                      | 8.93E-01        | <b>0.982</b>    | <b>0.038</b> | <b>2.98E-02</b>                                   | -0.053        | 0.042        | 2.05E-01        |                                                   |    |   |  |  |
| rs6750529   | T/C     | 0.004                                      | 0.047        | 9.30E-01        | -0.066        | 0.048                                      | 1.66E-01        | -0.054          | 0.037        | 1.43E-01                                          | -0.006        | 0.039        | 8.79E-01        |                                                   |    |   |  |  |
| rs17229285  | C/T     | 0.058                                      | 0.065        | 3.73E-01        | -0.038        | 0.042                                      | 3.62E-01        | -0.016          | 0.032        | 6.17E-01                                          | 0.040         | 0.035        | 2.49E-01        |                                                   |    |   |  |  |
| rs62193862  | A/G     |                                            |              |                 |               |                                            |                 | Excluded for MR |              |                                                   |               |              |                 |                                                   |    |   |  |  |
| rs4674993   | A/G     | 0.015                                      | 0.052        | 7.70E-01        | 0.034         | 0.075                                      | 6.51E-01        | 0.044           | 0.057        | 4.37E-01                                          | -0.048        | 0.053        | 3.67E-01        |                                                   |    |   |  |  |
| rs11713899  | C/A     | -0.049                                     | 0.053        | 3.55E-01        | -0.006        | 0.055                                      | 9.18E-01        | -0.082          | 0.042        | 5.29E-02                                          | 0.016         | 0.045        | 7.20E-01        |                                                   |    |   |  |  |
| rs748832    | G/A     | 0.045                                      | 0.043        | 2.91E-01        | 0.054         | 0.044                                      | 2.15E-01        | 0.062           | 0.034        | 6.52E-02                                          | 0.020         | 0.035        | 5.64E-01        |                                                   |    |   |  |  |
| rs2526390   | T/C     | -0.061                                     | 0.062        | 3.29E-01        | 0.049         | 0.044                                      | 2.62E-01        | -0.001          | 0.034        | 9.69E-01                                          | -0.006        | 0.036        | 8.58E-01        |                                                   |    |   |  |  |
| rs221988    | A/C     | 0.047                                      | 0.066        | 4.75E-01        | -0.017        | 0.044                                      | 7.02E-01        | 0.049           | 0.034        | 1.52E-01                                          | -0.009        | 0.036        | 8.02E-01        |                                                   |    |   |  |  |
| rs11128203  | A/T     |                                            |              |                 |               |                                            |                 | Excluded for MR |              |                                                   |               |              |                 |                                                   |    |   |  |  |
| rs62246017  | G/A     | -0.028                                     | 0.045        | 5.31E-01        | -0.046        | 0.046                                      | 3.14E-01        | -0.038          | 0.036        | 2.84E-01                                          | -0.050        | 0.048        | 2.92E-01        |                                                   |    |   |  |  |
| rs12633090  | G/C     | 0.087                                      | 0.052        | 9.46E-02        | 0.014         | 0.052                                      | 7.87E-01        | 0.072           | 0.057        | 2.06E-01                                          | 0.021         | 0.059        | 7.17E-01        |                                                   |    |   |  |  |
| rs1549979   | C/T     | 0.037                                      | 0.042        | 3.75E-01        | 0.017         | 0.042                                      | 6.91E-01        | -0.009          | 0.033        | 7.83E-01                                          | 0.050         | 0.035        | 1.51E-01        |                                                   |    |   |  |  |
| rs6437769   | T/C     | -0.028                                     | 0.057        | 6.21E-01        | 0.086         | 0.058                                      | 1.40E-01        | 0.032           | 0.033        | 3.31E-01                                          | 0.013         | 0.034        | 7.11E-01        |                                                   |    |   |  |  |
| rs9288999   | A/G     | 0.018                                      | 0.046        | 6.98E-01        | <b>-0.137</b> | <b>0.048</b>                               | <b>4.24E-03</b> | -0.044          | 0.036        | 2.31E-01                                          | -0.067        | 0.038        | 7.91E-02        |                                                   |    |   |  |  |
| rs6438436   | T/C     | 0.028                                      | 0.084        | 7.40E-01        | 0.075         | 0.057                                      | 1.86E-01        | 0.016           | 0.043        | 7.09E-01                                          | 0.071         | 0.046        | 1.24E-01        |                                                   |    |   |  |  |
| rs9826984   | G/A     | 0.017                                      | 0.042        | 6.89E-01        | 0.029         | 0.042                                      | 4.82E-01        | -0.019          | 0.032        | 5.65E-01                                          | <b>0.069</b>  | <b>0.034</b> | <b>4.42E-02</b> |                                                   |    |   |  |  |
| rs2279829   | C/T     | 0.057                                      | 0.053        | 2.82E-01        | 0.027         | 0.053                                      | 6.13E-01        | 0.026           | 0.041        | 5.31E-01                                          | -0.004        | 0.043        | 9.28E-01        |                                                   |    |   |  |  |
| rs2319545   | A/C     | -0.025                                     | 0.063        | 6.86E-01        | -0.020        | 0.062                                      | 7.46E-01        | -0.019          | 0.066        | 7.70E-01                                          | 0.032         | 0.050        | 5.31E-01        |                                                   |    |   |  |  |
| rs1714521   | A/C     | -0.034                                     | 0.042        | 4.12E-01        | -0.036        | 0.043                                      | 4.06E-01        | 0.002           | 0.033        | 9.41E-01                                          | -0.036        | 0.044        | 4.10E-01        |                                                   |    |   |  |  |
| rs1449012   | C/T     | 0.034                                      | 0.054        | 5.29E-01        | -0.048        | 0.042                                      | 2.57E-01        | -0.024          | 0.044        | 5.79E-01                                          | 0.066         | 0.034        | 5.49E-02        |                                                   |    |   |  |  |
| rs1187820   | C/T     | 0.031                                      | 0.044        | 4.84E-01        | 0.069         | 0.061                                      | 2.61E-01        | 0.002           | 0.035        | 9.57E-01                                          | 0.037         | 0.053        | 4.82E-01        |                                                   |    |   |  |  |
| rs7631379   | C/T     | 0.010                                      | 0.076        | 8.92E-01        | -0.133        | 0.074                                      | 7.15E-02        | 0.006           | 0.043        | 8.86E-01                                          | <b>-0.093</b> | <b>0.046</b> | <b>4.13E-02</b> |                                                   |    |   |  |  |
| rs4140932   | T/A     |                                            |              |                 |               |                                            |                 | Excluded for MR |              |                                                   |               |              |                 |                                                   |    |   |  |  |
| rs59537158  | T/C     | <b>-0.109</b>                              | <b>0.053</b> | <b>4.12E-02</b> | 0.070         | 0.054                                      | 1.96E-01        | -0.049          | 0.042        | 2.43E-01                                          | 0.048         | 0.043        | 2.69E-01        |                                                   |    |   |  |  |
| rs8400863   | G/A     | <b>0.018</b>                               | 0.043        | 6.85E-01        | 0.048         | 0.044                                      | 2.68E-01        | -0.003          | 0.034        | 9.39E-01                                          | 0.029         | 0.036        | 4.24E-01        |                                                   |    |   |  |  |
| rs112725451 | T/C     | -0.016                                     | 0.052        | 7.54E-01        | 0.055         | 0.054                                      | 3.04E-01        | -0.013          | 0.041        | 7.51E-01                                          | 0.030         | 0.044        | 4.97E-01        |                                                   |    |   |  |  |
| rs1160685   | G/C     |                                            |              |                 |               |                                            |                 | Excluded for MR |              |                                                   |               |              |                 |                                                   |    |   |  |  |
| rs3934797   | G/A     | 0.020                                      | 0.055        | 7.12E-01        | 0.010         | 0.058                                      | 8.60E-01        | 0.041           | 0.044        | 3.54E-01                                          | 0.003         | 0.068        | 9.60E-01        |                                                   |    |   |  |  |
| rs71602617  | C/T     | -0.016                                     | 0.052        | 7.64E-01        | 0.047         | 0.064                                      | 4.60E-01        | -0.035          | 0.040        | 3.84E-01                                          | 0.033         | 0.042        | 4.42E-01        |                                                   |    |   |  |  |
| rs7696257   | A/G     | 0.020                                      | 0.043        | 6.40E-01        | -0.035        | 0.044                                      | 4.17E-01        | 0.024           | 0.034        | 4.68E-01                                          | -0.041        | 0.036        | 2.53E-01        |                                                   |    |   |  |  |
| rs1116690   | G/A     | -0.061                                     | 0.048        | 2.03E-01        | -0.046        | 0.050                                      | 3.58E-01        | -0.049          | 0.038        | 1.95E-01                                          | 0.001         | 0.040        | 9.78E-01        |                                                   |    |   |  |  |
| rs13110073  | T/C     | -0.010                                     | 0.042        | 8.02E-01        | -0.074        | 0.042                                      | 7.85E-02        | -0.054          | 0.032        | 9.92E-02                                          | -0.052        | 0.035        | 1.38E-01        |                                                   |    |   |  |  |
| rs62340589  | C/G     | -0.067                                     | 0.054        | 2.14E-01        | 0.048         | 0.053                                      | 3.65E-01        | 0.014           | 0.042        | 7.40E-01                                          | -0.011        | 0.044        | 8.02E-01        |                                                   |    |   |  |  |

| SNP        | E/A/BA | Age ≤ 67y<br>(2,878 cases; 2,944 controls) |              |                 |               | Age > 67y<br>(3,208 cases; 2,728 controls) |                 |               |              | PD duration ≤ 7y<br>(3,633 cases; 6,836 controls) |               |              |                 | PD duration > 7y<br>(3,271 cases; 6,836 controls) |    |   |  |
|------------|--------|--------------------------------------------|--------------|-----------------|---------------|--------------------------------------------|-----------------|---------------|--------------|---------------------------------------------------|---------------|--------------|-----------------|---------------------------------------------------|----|---|--|
|            |        | Beta                                       | SE           | p               |               | Beta                                       | SE              | p             |              | Beta                                              | SE            | p            |                 | Beta                                              | SE | p |  |
| rs12517438 | G/T    | 0.040                                      | 0.041        | 3.23E-01        | -0.003        | 0.042                                      | 9.36E-01        | 0.026         | 0.032        | 4.05E-01                                          | -0.009        | 0.034        | 7.92E-01        |                                                   |    |   |  |
| rs35375873 | G/C    |                                            |              |                 |               |                                            | Excluded for MR |               |              |                                                   |               |              |                 |                                                   |    |   |  |
| rs71592686 | C/T    | 0.048                                      | 0.046        | 2.94E-01        | 0.053         | 0.046                                      | 2.50E-01        | <u>0.085</u>  | <b>0.036</b> | <b>1.71E-02</b>                                   | 0.023         | 0.038        | 5.57E-01        |                                                   |    |   |  |
| rs6874731  | G/T    | 0.017                                      | 0.041        | 6.81E-01        | -0.020        | 0.041                                      | 6.28E-01        | 0.008         | 0.032        | 7.94E-01                                          | -0.022        | 0.034        | 5.22E-01        |                                                   |    |   |  |
| rs6452785  | C/T    | -0.066                                     | 0.041        | 1.05E-01        | 0.013         | 0.058                                      | 8.20E-01        | -0.012        | 0.032        | 7.16E-01                                          | -0.065        | 0.034        | 5.53E-02        |                                                   |    |   |  |
| rs42417    | T/C    | -0.070                                     | 0.046        | 1.32E-01        | -0.129        | 0.072                                      | 7.50E-02        | <u>-0.116</u> | <b>0.052</b> | <b>2.51E-02</b>                                   | -0.055        | 0.038        | 1.52E-01        |                                                   |    |   |  |
| rs72780746 | T/C    | <u>-0.134</u>                              | <b>0.051</b> | <b>9.26E-03</b> | 0.002         | 0.052                                      | 9.64E-01        | -0.063        | 0.040        | 1.15E-01                                          | -0.049        | 0.043        | 2.53E-01        |                                                   |    |   |  |
| rs329124   | A/G    | -0.040                                     | 0.041        | 3.31E-01        | -0.045        | 0.042                                      | 2.78E-01        | -0.061        | 0.032        | 5.71E-02                                          | 0.004         | 0.034        | 9.07E-01        |                                                   |    |   |  |
| rs1385108  | T/C    | -0.011                                     | 0.049        | 8.25E-01        | 0.033         | 0.050                                      | 5.11E-01        | -0.005        | 0.038        | 8.96E-01                                          | -0.016        | 0.040        | 6.92E-01        |                                                   |    |   |  |
| rs6890961  | C/T    | -0.109                                     | 0.066        | 1.00E-01        | 0.007         | 0.044                                      | 8.74E-01        | -0.018        | 0.034        | 5.91E-01                                          | -0.064        | 0.036        | 7.78E-02        |                                                   |    |   |  |
| rs4044321  | A/G    | -0.003                                     | 0.043        | 9.46E-01        | -0.016        | 0.044                                      | 7.20E-01        | -0.010        | 0.034        | 7.62E-01                                          | -0.045        | 0.036        | 2.18E-01        |                                                   |    |   |  |
| rs2173019  | A/T    | 0.050                                      | 0.080        | 5.29E-01        | 0.021         | 0.055                                      | 7.03E-01        | 0.018         | 0.043        | 6.71E-01                                          | <b>0.091</b>  | <b>0.045</b> | <b>4.15E-02</b> |                                                   |    |   |  |
| rs1150668  | T/G    | -0.027                                     | 0.042        | 5.20E-01        | 0.034         | 0.044                                      | 4.34E-01        | 0.021         | 0.033        | 5.31E-01                                          | -0.006        | 0.035        | 8.69E-01        |                                                   |    |   |  |
| rs3218116  | C/T    | -0.045                                     | 0.079        | 5.65E-01        | 0.013         | 0.049                                      | 7.85E-01        | 0.001         | 0.038        | 9.78E-01                                          | -0.026        | 0.040        | 5.14E-01        |                                                   |    |   |  |
| rs160631   | T/G    | 0.063                                      | 0.046        | 1.71E-01        | 0.040         | 0.047                                      | 3.88E-01        | <u>0.071</u>  | <b>0.036</b> | <b>4.84E-02</b>                                   | 0.011         | 0.038        | 7.71E-01        |                                                   |    |   |  |
| rs7743165  | G/T    | <0.001                                     | 0.062        | 9.94E-01        | <u>-0.104</u> | <b>0.042</b>                               | <b>1.26E-02</b> | <u>-0.065</u> | <b>0.032</b> | <b>4.49E-02</b>                                   | -0.059        | 0.044        | 1.85E-01        |                                                   |    |   |  |
| rs10945141 | A/G    | -0.002                                     | 0.046        | 9.72E-01        | 0.017         | 0.047                                      | 7.21E-01        | -0.011        | 0.036        | 7.59E-01                                          | 0.040         | 0.038        | 2.90E-01        |                                                   |    |   |  |
| rs17554906 | C/G    |                                            |              |                 |               |                                            | Excluded for MR |               |              |                                                   |               |              |                 |                                                   |    |   |  |
| rs6568832  | A/G    | <b>-0.096</b>                              | <b>0.048</b> | <b>4.55E-02</b> | 0.006         | 0.049                                      | 9.01E-01        | -0.022        | 0.038        | 5.57E-01                                          | -0.026        | 0.040        | 5.11E-01        |                                                   |    |   |  |
| rs12195240 | A/G    | 0.009                                      | 0.045        | 8.37E-01        | <u>-0.096</u> | <b>0.044</b>                               | <b>3.03E-02</b> | -0.031        | 0.034        | 3.68E-01                                          | -0.023        | 0.037        | 5.24E-01        |                                                   |    |   |  |
| rs6936160  | T/C    | 0.080                                      | 0.045        | 7.41E-02        | -0.001        | 0.045                                      | 9.80E-01        | 0.053         | 0.035        | 1.26E-01                                          | -0.025        | 0.037        | 4.99E-01        |                                                   |    |   |  |
| rs118202   | G/T    | -0.098                                     | 0.075        | 1.91E-01        | -0.045        | 0.055                                      | 4.08E-01        | <u>-0.093</u> | <b>0.042</b> | <b>2.82E-02</b>                                   | -0.016        | 0.067        | 8.08E-01        |                                                   |    |   |  |
| rs1737329  | G/C    | -0.041                                     | 0.047        | 3.84E-01        | 0.011         | 0.067                                      | 8.70E-01        | -0.024        | 0.037        | 5.14E-01                                          | -0.001        | 0.053        | 9.85E-01        |                                                   |    |   |  |
| rs6948707  | G/T    | -0.003                                     | 0.041        | 9.51E-01        | -0.032        | 0.057                                      | 5.73E-01        | 0.002         | 0.032        | 9.45E-01                                          | 0.007         | 0.035        | 8.48E-01        |                                                   |    |   |  |
| rs7809303  | G/A    | <u>-0.104</u>                              | <b>0.043</b> | <b>1.68E-02</b> | -0.020        | 0.044                                      | 6.52E-01        | <u>-0.068</u> | <b>0.034</b> | <b>4.63E-02</b>                                   | -0.063        | 0.036        | 8.17E-02        |                                                   |    |   |  |
| rs1030015  | T/G    | -0.028                                     | 0.049        | 5.61E-01        | 0.014         | 0.051                                      | 7.81E-01        | 0.026         | 0.048        | 5.80E-01                                          | -0.011        | 0.034        | 7.56E-01        |                                                   |    |   |  |
| rs4727189  | C/T    | <u>0.083</u>                               | <b>0.042</b> | <b>4.58E-02</b> | -0.005        | 0.043                                      | 9.08E-01        | -0.004        | 0.033        | 8.94E-01                                          | 0.068         | 0.035        | 5.47E-02        |                                                   |    |   |  |
| rs11768481 | C/A    |                                            |              |                 |               |                                            | Excluded for MR |               |              |                                                   |               |              |                 |                                                   |    |   |  |
| rs13437771 | A/G    | -0.060                                     | 0.057        | 2.93E-01        | -0.018        | 0.057                                      | 7.46E-01        | -0.058        | 0.044        | 1.88E-01                                          | -0.025        | 0.047        | 5.92E-01        |                                                   |    |   |  |
| rs10233018 | G/A    | 0.011                                      | 0.041        | 7.88E-01        | 0.008         | 0.042                                      | 8.42E-01        | -0.017        | 0.032        | 5.93E-01                                          | 0.054         | 0.034        | 1.13E-01        |                                                   |    |   |  |
| rs10953957 | A/G    | 0.071                                      | 0.055        | 1.99E-01        | -0.017        | 0.043                                      | 6.83E-01        | 0.023         | 0.033        | 4.76E-01                                          | 0.048         | 0.035        | 1.75E-01        |                                                   |    |   |  |
| rs77283305 | G/A    | -0.018                                     | 0.044        | 6.84E-01        | -0.047        | 0.044                                      | 2.92E-01        | 0.015         | 0.035        | 6.60E-01                                          | <u>-0.085</u> | <b>0.036</b> | <b>1.86E-02</b> |                                                   |    |   |  |
| rs10279261 | G/A    | -0.011                                     | 0.062        | 8.58E-01        | -0.019        | 0.044                                      | 6.62E-01        | 0.011         | 0.034        | 7.33E-01                                          | -0.037        | 0.036        | 3.10E-01        |                                                   |    |   |  |
| rs4326350  | C/G    |                                            |              |                 |               |                                            | Excluded for MR |               |              |                                                   |               |              |                 |                                                   |    |   |  |
| rs11783093 | C/T    | -0.004                                     | 0.080        | 9.61E-01        | 0.011         | 0.055                                      | 8.47E-01        | 0.010         | 0.043        | 8.19E-01                                          | -0.048        | 0.057        | 4.02E-01        |                                                   |    |   |  |
| rs7836565  | C/T    | 0.038                                      | 0.046        | 4.09E-01        | <u>0.114</u>  | <b>0.046</b>                               | <b>1.37E-02</b> | 0.047         | 0.036        | 1.90E-01                                          | 0.083         | 0.038        | 2.82E-02        |                                                   |    |   |  |
| rs13261666 | G/T    | -0.052                                     | 0.055        | 3.41E-01        | -0.020        | 0.041                                      | 6.28E-01        | -0.014        | 0.032        | 6.54E-01                                          | -0.020        | 0.034        | 5.59E-01        |                                                   |    |   |  |
| rs3850736  | G/C    |                                            |              |                 |               |                                            | Excluded for MR |               |              |                                                   |               |              |                 |                                                   |    |   |  |
| rs2063976  | C/T    | 0.021                                      | 0.043        | 6.34E-01        | -0.059        | 0.044                                      | 1.79E-01        | 0.001         | 0.034        | 9.71E-01                                          | -0.030        | 0.036        | 4.14E-01        |                                                   |    |   |  |
| rs6986430  | T/C    | -0.034                                     | 0.048        | 4.73E-01        | 0.068         | 0.049                                      | 1.63E-01        | -0.010        | 0.037        | 7.85E-01                                          | 0.053         | 0.040        | 1.86E-01        |                                                   |    |   |  |
| rs290601   | T/C    | 0.040                                      | 0.046        | 3.85E-01        | 0.032         | 0.047                                      | 4.89E-01        | 0.039         | 0.035        | 2.76E-01                                          | -0.027        | 0.038        | 4.80E-01        |                                                   |    |   |  |

| SNP        | E/A/B/A | Age ≤ 67y<br>(2,878 cases; 2,944 controls) |              |                 |               | Age > 67y<br>(3,208 cases; 2,728 controls) |                  |               |              | PD duration ≤ 7y<br>(3,633 cases; 6,836 controls) |               |              |                 | PD duration > 7y<br>(3,271 cases; 6,836 controls) |    |   |  |
|------------|---------|--------------------------------------------|--------------|-----------------|---------------|--------------------------------------------|------------------|---------------|--------------|---------------------------------------------------|---------------|--------------|-----------------|---------------------------------------------------|----|---|--|
|            |         | Beta                                       | SE           | p               |               | Beta                                       | SE               | p             |              | Beta                                              | SE            | p            |                 | Beta                                              | SE | p |  |
|            |         |                                            |              |                 |               |                                            |                  |               |              |                                                   |               |              |                 |                                                   |    |   |  |
| rs3847244  | T/C     | -0.046                                     | 0.042        | 2.72E-01        | -0.058        | 0.043                                      | 1.78E-01         | -0.028        | 0.033        | 3.99E-01                                          | -0.036        | 0.035        | 3.10E-01        |                                                   |    |   |  |
| rs11791671 | T/C     | -0.027                                     | 0.130        | 8.34E-01        | -0.016        | 0.088                                      | 8.57E-01         | -0.012        | 0.096        | 9.00E-01                                          | 0.078         | 0.088        | 3.78E-01        |                                                   |    |   |  |
| rs7024924  | C/T     | -0.061                                     | 0.054        | 2.61E-01        | -0.014        | 0.055                                      | 7.92E-01         | -0.010        | 0.042        | 8.15E-01                                          | -0.002        | 0.045        | 9.71E-01        |                                                   |    |   |  |
| rs10966092 | T/C     | -0.009                                     | 0.047        | 8.53E-01        | -0.046        | 0.046                                      | 3.24E-01         | -0.048        | 0.046        | 2.95E-01                                          | 0.018         | 0.039        | 6.42E-01        |                                                   |    |   |  |
| rs4877285  | G/A     | -0.069                                     | 0.074        | 3.53E-01        | -0.046        | 0.060                                      | 4.47E-01         | -0.036        | 0.034        | 2.92E-01                                          | <b>-0.088</b> | <b>0.037</b> | <b>1.58E-02</b> |                                                   |    |   |  |
| rs2378662  | A/G     | 0.019                                      | 0.043        | 6.51E-01        | -0.019        | 0.067                                      | 7.81E-01         | -0.017        | 0.044        | 6.96E-01                                          | 0.011         | 0.035        | 7.57E-01        |                                                   |    |   |  |
| rs4837631  | C/T     | 0.049                                      | 0.042        | 2.44E-01        | 0.028         | 0.043                                      | 5.08E-01         | 0.045         | 0.033        | 1.72E-01                                          | -0.028        | 0.035        | 4.29E-01        |                                                   |    |   |  |
| rs34553878 | G/A     |                                            |              |                 |               |                                            | Excluded for MR  |               |              |                                                   |               |              |                 |                                                   |    |   |  |
| rs10858334 | G/C     | -0.076                                     | 0.060        | 2.11E-01        | -0.124        | 0.079                                      | 1.14E-01         | -0.068        | 0.048        | 1.55E-01                                          | -0.076        | 0.069        | 2.72E-01        |                                                   |    |   |  |
| rs7920501  | T/A     |                                            |              |                 |               |                                            | Excluded for MR  |               |              |                                                   |               |              |                 |                                                   |    |   |  |
| rs1291821  | G/A     | -0.012                                     | 0.041        | 7.65E-01        | 0.004         | 0.042                                      | 9.20E-01         | -0.024        | 0.032        | 4.64E-01                                          | -0.009        | 0.034        | 7.95E-01        |                                                   |    |   |  |
| rs7072776  | A/G     | 0.020                                      | 0.047        | 6.77E-01        | -0.019        | 0.048                                      | 6.98E-01         | -0.014        | 0.037        | 6.99E-01                                          | 0.040         | 0.040        | 3.10E-01        |                                                   |    |   |  |
| rs2796793  | A/G     | <b>0.100</b>                               | <b>0.043</b> | <b>2.11E-02</b> | 0.011         | 0.043                                      | 7.88E-01         | <b>0.081</b>  | <b>0.033</b> | <b>1.55E-02</b>                                   | 0.038         | 0.053        | 4.73E-01        |                                                   |    |   |  |
| rs1733760  | C/T     | -0.005                                     | 0.042        | 8.98E-01        | 0.008         | 0.043                                      | 8.57E-01         | -0.014        | 0.033        | 6.73E-01                                          | 0.052         | 0.035        | 1.38E-01        |                                                   |    |   |  |
| rs7921378  | G/C     |                                            |              |                 |               |                                            | Excluded for MR  |               |              |                                                   |               |              |                 |                                                   |    |   |  |
| rs11594623 | C/T     | -0.043                                     | 0.050        | 3.89E-01        | <b>-0.133</b> | <b>0.051</b>                               | <b>9.75E-03</b>  | -0.076        | 0.039        | 5.41E-02                                          | -0.032        | 0.042        | 4.36E-01        |                                                   |    |   |  |
| rs12244388 | A/G     | <b>-0.098</b>                              | <b>0.042</b> | <b>2.00E-02</b> | -0.048        | 0.042                                      | 2.57E-01         | <b>-0.086</b> | <b>0.033</b> | <b>8.52E-03</b>                                   | -0.036        | 0.035        | 2.95E-01        |                                                   |    |   |  |
| rs10885480 | T/C     | -0.072                                     | 0.047        | 1.28E-01        | 0.046         | 0.047                                      | 3.35E-01         | 0.003         | 0.037        | 9.34E-01                                          | -0.044        | 0.039        | 2.54E-01        |                                                   |    |   |  |
| rs4752018  | A/C     | -0.040                                     | 0.048        | 4.02E-01        | 0.017         | 0.049                                      | 7.27E-01         | -0.049        | 0.050        | 3.33E-01                                          | -0.030        | 0.040        | 4.63E-01        |                                                   |    |   |  |
| rs9423279  | C/G     |                                            |              |                 |               |                                            | Excluded for MR  |               |              |                                                   |               |              |                 |                                                   |    |   |  |
| rs6265     | C/T     | 0.060                                      | 0.052        | 2.46E-01        | -0.012        | 0.052                                      | 8.17E-01         | 0.039         | 0.040        | 3.30E-01                                          | 0.023         | 0.043        | 5.88E-01        |                                                   |    |   |  |
| rs2939756  | G/A     | -0.019                                     | 0.041        | 6.33E-01        | -0.010        | 0.042                                      | 8.17E-01         | -0.019        | 0.032        | 5.52E-01                                          | -0.017        | 0.034        | 6.28E-01        |                                                   |    |   |  |
| rs1381775  | T/C     | -0.006                                     | 0.046        | 9.02E-01        | -0.071        | 0.047                                      | 1.26E-01         | -0.034        | 0.036        | 3.45E-01                                          | -0.060        | 0.038        | 1.14E-01        |                                                   |    |   |  |
| rs61886926 | C/T     | -0.056                                     | 0.042        | 1.82E-01        | -0.003        | 0.064                                      | 9.63E-01         | -0.020        | 0.033        | 5.38E-01                                          | -0.001        | 0.044        | 9.78E-01        |                                                   |    |   |  |
| rs6444740  | C/T     | -0.015                                     | 0.041        | 7.21E-01        | -0.008        | 0.041                                      | 8.48E-01         | -0.015        | 0.032        | 6.42E-01                                          | -0.003        | 0.034        | 9.33E-01        |                                                   |    |   |  |
| rs7943721  | G/A     |                                            |              |                 |               |                                            | NA in COURAGE-PD |               |              |                                                   |               |              |                 |                                                   |    |   |  |
| rs7929518  | G/A     | <0.001                                     | 0.048        | 9.99E-01        | -0.027        | 0.048                                      | 5.75E-01         | -0.042        | 0.037        | 2.55E-01                                          | -0.014        | 0.040        | 7.20E-01        |                                                   |    |   |  |
| rs2155646  | C/T     | -0.018                                     | 0.042        | 6.63E-01        | -0.027        | 0.042                                      | 5.27E-01         | -0.018        | 0.033        | 5.81E-01                                          | -0.012        | 0.035        | 7.24E-01        |                                                   |    |   |  |
| rs1713676  | A/G     | 0.019                                      | 0.042        | 6.49E-01        | 0.060         | 0.045                                      | 1.86E-01         | 0.048         | 0.032        | 1.31E-01                                          | 0.039         | 0.034        | 2.56E-01        |                                                   |    |   |  |
| rs540860   | G/A     | 0.061                                      | 0.040        | 1.34E-01        | 0.030         | 0.042                                      | 4.67E-01         | 0.034         | 0.032        | 2.82E-01                                          | 0.055         | 0.034        | 1.04E-01        |                                                   |    |   |  |
| rs1106363  | T/C     | -0.013                                     | 0.042        | 7.62E-01        | 0.057         | 0.043                                      | 1.83E-01         | -0.026        | 0.033        | 4.26E-01                                          | 0.067         | 0.035        | 5.57E-02        |                                                   |    |   |  |
| rs2010921  | A/G     | 0.017                                      | 0.045        | 6.98E-01        | 0.034         | 0.045                                      | 4.48E-01         | 0.037         | 0.035        | 2.88E-01                                          | 0.037         | 0.037        | 3.29E-01        |                                                   |    |   |  |
| rs11057005 | A/G     | -0.045                                     | 0.061        | 4.57E-01        | -0.082        | 0.043                                      | 6.05E-02         | -0.033        | 0.048        | 4.92E-01                                          | -0.021        | 0.036        | 5.62E-01        |                                                   |    |   |  |
| rs13906    | C/T     | <b>-0.139</b>                              | <b>0.066</b> | <b>3.55E-02</b> | 0.122         | 0.068                                      | 7.26E-02         | 0.058         | 0.052        | 2.72E-01                                          | -0.057        | 0.054        | 2.95E-01        |                                                   |    |   |  |
| rs4759229  | G/A     | 0.008                                      | 0.060        | 8.94E-01        | -0.005        | 0.046                                      | 9.20E-01         | <0.001        | 0.036        | 9.94E-01                                          | 0.008         | 0.037        | 8.29E-01        |                                                   |    |   |  |
| rs7969559  | A/G     | -0.018                                     | 0.044        | 6.75E-01        | -0.038        | 0.045                                      | 3.88E-01         | -0.065        | 0.035        | 6.19E-02                                          | 0.041         | 0.037        | 2.70E-01        |                                                   |    |   |  |
| rs7134009  | T/C     | -0.006                                     | 0.044        | 8.96E-01        | -0.030        | 0.044                                      | 4.95E-01         | -0.030        | 0.034        | 3.79E-01                                          | <0.001        | 0.037        | 9.92E-01        |                                                   |    |   |  |
| rs77215829 | A/C     |                                            |              |                 |               |                                            | Excluded for MR  |               |              |                                                   |               |              |                 |                                                   |    |   |  |
| rs1109480  | G/A     | -0.021                                     | 0.043        | 6.22E-01        | -0.041        | 0.043                                      | 3.33E-01         | -0.043        | 0.034        | 6.22E-01                                          | -0.030        | 0.066        | 6.45E-01        |                                                   |    |   |  |
| rs11611651 | A/G     | -0.054                                     | 0.077        | 4.82E-01        |               |                                            | Excluded for MR  | -0.005        | 0.060        | 9.28E-01                                          | -0.026        | 0.035        | 4.61E-01        |                                                   |    |   |  |
| rs17197663 | G/A     | 0.092                                      | 0.059        | 1.17E-01        | 0.023         | 0.060                                      | 7.06E-01         | 0.018         | 0.072        | 8.04E-01                                          | -0.021        | 0.051        | 6.83E-01        |                                                   |    |   |  |

| SNP         | E/A/B/A | Age ≤ 67y<br>(2,878 cases; 2,944 controls) |       |                 |               | Age > 67y<br>(3,208 cases; 2,728 controls) |                 |        |       | PD duration ≤ 7y<br>(3,633 cases; 6,836 controls) |               |              |                 | PD duration > 7y<br>(3,271 cases; 6,836 controls) |    |   |  |
|-------------|---------|--------------------------------------------|-------|-----------------|---------------|--------------------------------------------|-----------------|--------|-------|---------------------------------------------------|---------------|--------------|-----------------|---------------------------------------------------|----|---|--|
|             |         | Beta                                       | SE    | p               |               | Beta                                       | SE              | p      |       | Beta                                              | SE            | p            |                 | Beta                                              | SE | p |  |
|             |         |                                            |       |                 |               |                                            |                 |        |       |                                                   |               |              |                 |                                                   |    |   |  |
| rs4264267   | T/C     | -0.046                                     | 0.042 | 2.72E-01        | -0.008        | 0.043                                      | 8.58E-01        | -0.031 | 0.033 | 3.44E-01                                          | -0.017        | 0.035        | 6.16E-01        |                                                   |    |   |  |
| rs61959481  | G/A     | 0.046                                      | 0.050 | 3.60E-01        | -0.049        | 0.052                                      | 3.40E-01        | -0.040 | 0.039 | 3.01E-01                                          | 0.020         | 0.042        | 6.34E-01        |                                                   |    |   |  |
| rs55786907  | G/A     | -0.030                                     | 0.054 | 5.75E-01        | 0.102         | 0.055                                      | 6.43E-02        | 0.037  | 0.042 | 3.82E-01                                          | 0.025         | 0.045        | 5.74E-01        |                                                   |    |   |  |
| rs9540731   | C/T     | -0.027                                     | 0.057 | 6.37E-01        | -0.042        | 0.055                                      | 4.44E-01        | -0.033 | 0.035 | 3.48E-01                                          | -0.031        | 0.047        | 5.10E-01        |                                                   |    |   |  |
| rs9545155   | T/C     | -0.032                                     | 0.041 | 4.37E-01        | 0.007         | 0.042                                      | 8.72E-01        | 0.013  | 0.043 | 7.57E-01                                          | 0.005         | 0.034        | 8.89E-01        |                                                   |    |   |  |
| rs1772572   | C/A     | -0.040                                     | 0.043 | 3.51E-01        | -0.017        | 0.044                                      | 7.04E-01        | -0.047 | 0.044 | 2.83E-01                                          | -0.060        | 0.036        | 8.98E-02        |                                                   |    |   |  |
| rs1108130   | A/T     | 0.031                                      | 0.053 | 5.54E-01        | -0.037        | 0.054                                      | 4.94E-01        | 0.024  | 0.041 | 5.59E-01                                          | -0.030        | 0.043        | 4.84E-01        |                                                   |    |   |  |
| rs12878369  | A/C     | -0.005                                     | 0.041 | 9.07E-01        | -0.044        | 0.053                                      | 4.10E-01        | -0.028 | 0.045 | 5.33E-01                                          | -0.029        | 0.043        | 5.10E-01        |                                                   |    |   |  |
| rs9323328   | A/G     | -0.037                                     | 0.042 | 3.76E-01        | 0.022         | 0.041                                      | 5.89E-01        | -0.026 | 0.032 | 4.25E-01                                          | 0.016         | 0.034        | 6.31E-01        |                                                   |    |   |  |
| rs1811739   | A/G     | 0.058                                      | 0.047 | 2.18E-01        | 0.069         | 0.048                                      | 1.52E-01        | 0.044  | 0.037 | 2.33E-01                                          | 0.019         | 0.039        | 6.20E-01        |                                                   |    |   |  |
| rs8005334   | G/T     | 0.018                                      | 0.064 | 7.82E-01        | -0.041        | 0.044                                      | 3.45E-01        | 0.004  | 0.034 | 9.14E-01                                          | -0.025        | 0.036        | 4.84E-01        |                                                   |    |   |  |
| rs2925128   | T/C     | -0.067                                     | 0.065 | 3.05E-01        | -0.017        | 0.042                                      | 6.92E-01        | -0.040 | 0.033 | 2.17E-01                                          | 0.015         | 0.045        | 7.36E-01        |                                                   |    |   |  |
| rs1381287   | T/C     | 0.004                                      | 0.041 | 9.31E-01        | 0.024         | 0.042                                      | 5.58E-01        | 0.026  | 0.032 | 4.23E-01                                          | 0.033         | 0.034        | 3.37E-01        |                                                   |    |   |  |
| rs1435672   | C/T     | 0.012                                      | 0.042 | 7.65E-01        | -0.032        | 0.042                                      | 4.44E-01        | -0.022 | 0.033 | 5.07E-01                                          | -0.027        | 0.048        | 5.75E-01        |                                                   |    |   |  |
| rs281296    | A/G     | -0.080                                     | 0.043 | 6.09E-02        | -0.038        | 0.043                                      | 3.76E-01        | -0.045 | 0.033 | 1.73E-01                                          | -0.052        | 0.036        | 1.47E-01        |                                                   |    |   |  |
| rs2289791   | G/T     |                                            |       | Excluded for MR |               |                                            |                 |        |       |                                                   |               |              |                 |                                                   |    |   |  |
| rs62007780  | G/T     | -0.025                                     | 0.042 | 5.53E-01        | 0.036         | 0.042                                      | 3.87E-01        | -0.007 | 0.032 | 8.39E-01                                          | -0.008        | 0.035        | 8.07E-01        |                                                   |    |   |  |
| rs4310804   | C/G     |                                            |       | Excluded for MR |               |                                            |                 |        |       |                                                   |               |              |                 |                                                   |    |   |  |
| rs1139897   | G/A     | -0.001                                     | 0.051 | 9.90E-01        | 0.070         | 0.052                                      | 1.83E-01        | 0.065  | 0.040 | 1.05E-01                                          | 0.035         | 0.042        | 4.13E-01        |                                                   |    |   |  |
| rs11076962  | C/T     | 0.020                                      | 0.047 | 6.64E-01        | -0.011        | 0.047                                      | 8.18E-01        | -0.002 | 0.036 | 9.61E-01                                          | 0.004         | 0.038        | 9.17E-01        |                                                   |    |   |  |
| rs9922607   | C/T     | 0.018                                      | 0.051 | 7.31E-01        | -0.027        | 0.075                                      | 7.21E-01        | -0.044 | 0.040 | 2.66E-01                                          | 0.002         | 0.044        | 9.71E-01        |                                                   |    |   |  |
| rs9941217   | C/G     | 0.004                                      | 0.044 | 9.33E-01        | 0.029         | 0.046                                      | 5.24E-01        | -0.004 | 0.047 | 9.24E-01                                          | -0.016        | 0.047        | 7.28E-01        |                                                   |    |   |  |
| rs6497840   | A/G     | -0.082                                     | 0.071 | 2.44E-01        | 0.055         | 0.046                                      | 2.25E-01        | 0.022  | 0.035 | 5.35E-01                                          | -0.048        | 0.038        | 2.00E-01        |                                                   |    |   |  |
| rs12918191  | A/G     | -0.009                                     | 0.047 | 8.44E-01        | -0.007        | 0.048                                      | 8.85E-01        | -0.016 | 0.037 | 6.57E-01                                          | 0.006         | 0.040        | 8.84E-01        |                                                   |    |   |  |
| rs9302604   | G/A     | -0.051                                     | 0.042 | 2.26E-01        | -0.068        | 0.055                                      | 2.13E-01        | -0.017 | 0.047 | 7.14E-01                                          | 0.021         | 0.035        | 5.44E-01        |                                                   |    |   |  |
| rs117657830 | A/G     | 0.108                                      | 0.107 | 3.16E-01        | -0.041        | 0.104                                      | 6.94E-01        | -0.050 | 0.081 | 5.32E-01                                          | 0.037         | 0.090        | 6.82E-01        |                                                   |    |   |  |
| rs1050847   | C/T     | 0.006                                      | 0.042 | 8.81E-01        | -0.014        | 0.043                                      | 7.39E-01        | 0.019  | 0.033 | 5.69E-01                                          | <b>-0.074</b> | <b>0.035</b> | <b>3.51E-02</b> |                                                   |    |   |  |
| rs11642231  | G/A     | 0.032                                      | 0.045 | 4.86E-01        | <b>0.094</b>  | <b>0.045</b>                               | <b>3.95E-02</b> | 0.056  | 0.035 | 1.12E-01                                          | 0.057         | 0.037        | 1.29E-01        |                                                   |    |   |  |
| rs4790874   | T/C     | -0.050                                     | 0.042 | 2.33E-01        | -0.020        | 0.042                                      | 6.43E-01        | 0.002  | 0.033 | 9.46E-01                                          | -0.064        | 0.035        | 6.59E-02        |                                                   |    |   |  |
| rs28441558  | T/C     |                                            |       | Excluded for MR |               |                                            |                 |        |       |                                                   |               |              |                 |                                                   |    |   |  |
| rs6777803   | G/T     | 0.056                                      | 0.054 | 3.08E-01        | -0.065        | 0.057                                      | 2.50E-01        | -0.049 | 0.054 | 3.69E-01                                          | -0.006        | 0.046        | 8.91E-01        |                                                   |    |   |  |
| rs3764351   | G/A     | -0.043                                     | 0.044 | 3.35E-01        | 0.001         | 0.058                                      | 9.86E-01        | -0.026 | 0.035 | 4.62E-01                                          | -0.045        | 0.037        | 2.26E-01        |                                                   |    |   |  |
| rs72836318  | T/C     | -0.062                                     | 0.073 | 3.94E-01        | <b>-0.135</b> | <b>0.049</b>                               | <b>5.4E-03</b>  | -0.068 | 0.038 | 7.09E-02                                          | <b>-0.124</b> | <b>0.040</b> | <b>1.85E-03</b> |                                                   |    |   |  |
| rs75919030  | T/C     | -0.019                                     | 0.047 | 6.84E-01        | 0.003         | 0.048                                      | 9.55E-01        | 0.014  | 0.037 | 7.12E-01                                          | -0.030        | 0.039        | 4.33E-01        |                                                   |    |   |  |
| rs2587507   | T/C     | -0.029                                     | 0.044 | 5.03E-01        | -0.037        | 0.041                                      | 3.61E-01        | -0.046 | 0.034 | 1.72E-01                                          | -0.022        | 0.034        | 5.08E-01        |                                                   |    |   |  |
| rs34342129  | T/C     | -0.011                                     | 0.042 | 7.92E-01        | -0.079        | 0.042                                      | 6.03E-02        | -0.057 | 0.032 | 7.66E-02                                          | -0.026        | 0.034        | 4.50E-01        |                                                   |    |   |  |
| rs4476253   | G/A     | 0.042                                      | 0.049 | 3.83E-01        | -0.021        | 0.075                                      | 7.81E-01        | -0.010 | 0.038 | 7.88E-01                                          | 0.024         | 0.056        | 6.73E-01        |                                                   |    |   |  |
| rs8096225   | C/A     | -0.021                                     | 0.045 | 6.34E-01        | 0.045         | 0.045                                      | 3.18E-01        | 0.016  | 0.035 | 6.47E-01                                          | -0.033        | 0.037        | 3.76E-01        |                                                   |    |   |  |
| rs67050670  | A/G     | 0.036                                      | 0.046 | 4.40E-01        | 0.057         | 0.048                                      | 2.35E-01        | 0.038  | 0.051 | 4.64E-01                                          | 0.051         | 0.039        | 1.94E-01        |                                                   |    |   |  |
| rs1373178   | T/G     | -0.001                                     | 0.042 | 9.81E-01        | -0.057        | 0.043                                      | 1.82E-01        | -0.042 | 0.033 | 2.01E-01                                          | -0.010        | 0.035        | 7.64E-01        |                                                   |    |   |  |
| rs72938304  | G/A     | 0.034                                      | 0.065 | 6.07E-01        | 0.113         | 0.067                                      | 9.06E-02        | 0.104  | 0.070 | 1.38E-01                                          | -0.033        | 0.054        | 5.47E-01        |                                                   |    |   |  |

| SNP         | E/A/B/A | Age ≤ 67y<br>(2,878 cases; 2,944 controls) |       |          |        | Age > 67y<br>(3,208 cases; 2,728 controls) |          |                  |        | PD duration ≤ 7y<br>(3,633 cases; 6,836 controls) |          |       |          | PD duration > 7y<br>(3,271 cases; 6,836 controls) |    |   |  |
|-------------|---------|--------------------------------------------|-------|----------|--------|--------------------------------------------|----------|------------------|--------|---------------------------------------------------|----------|-------|----------|---------------------------------------------------|----|---|--|
|             |         | Beta                                       | SE    | p        |        | Beta                                       | SE       | p                |        | Beta                                              | SE       | p     |          | Beta                                              | SE | p |  |
|             |         |                                            |       |          |        |                                            |          |                  |        |                                                   |          |       |          |                                                   |    |   |  |
| rs71367544  | T/C     | -0.059                                     | 0.054 | 2.74E-01 | 0.078  | 0.055                                      | 1.62E-01 | NA in COURAGE-PD | -0.011 | 0.043                                             | 8.03E-01 | 0.063 | 0.044    | 1.59E-01                                          |    |   |  |
| rs76608582  | C/A     | 0.001                                      | 0.045 | 9.90E-01 | -0.054 | 0.045                                      | 2.35E-01 | 0.004            | 0.044  | 9.22E-01                                          | -0.020   | 0.037 | 5.79E-01 |                                                   |    |   |  |
| rs10853981  | A/G     | 0.020                                      | 0.071 | 7.78E-01 | 0.073  | 0.050                                      | 1.41E-01 | 0.031            | 0.039  | 4.22E-01                                          | 0.047    | 0.041 | 2.59E-01 |                                                   |    |   |  |
| rs113230003 | G/A     | 0.030                                      | 0.042 | 4.73E-01 | -0.050 | 0.058                                      | 3.87E-01 | 0.015            | 0.035  | 6.75E-01                                          | -0.017   | 0.039 | 6.61E-01 |                                                   |    |   |  |
| rs117734003 | C/G     | 0.063                                      | 0.052 | 2.26E-01 | -0.060 | 0.053                                      | 2.59E-01 | -0.090           | 0.113  | 4.20E-01                                          | -0.041   | 0.121 | 7.40E-01 |                                                   |    |   |  |
| rs1126757   | T/C     | -0.031                                     | 0.065 | 6.31E-01 | -0.026 | 0.059                                      | 6.63E-01 | 0.020            | 0.041  | 6.28E-01                                          | -0.010   | 0.044 | 8.23E-01 |                                                   |    |   |  |
| rs117495226 | G/A     | -0.075                                     | 0.041 | 6.81E-02 | 0.018  | 0.042                                      | 6.68E-01 | -0.047           | 0.046  | 3.07E-01                                          | -0.038   | 0.053 | 4.67E-01 |                                                   |    |   |  |
| rs6073075   | T/A     | 0.071                                      | 0.060 | 2.36E-01 | -0.006 | 0.043                                      | 8.98E-01 | -0.026           | 0.032  | 4.26E-01                                          | -0.056   | 0.034 | 1.06E-01 |                                                   |    |   |  |
| rs3810496   | C/T     |                                            |       |          |        |                                            |          | 0.011            | 0.050  | 8.31E-01                                          | 0.021    | 0.035 | 5.48E-01 |                                                   |    |   |  |
| rs4818005   | G/A     |                                            |       |          |        |                                            |          |                  |        |                                                   |          |       |          |                                                   |    |   |  |
| rs4822102   | C/T     |                                            |       |          |        |                                            |          |                  |        |                                                   |          |       |          |                                                   |    |   |  |

NA, not available; E/A/B/A, effect allele/base allele; SE, standard error.

Bold coefficients with their corresponding SE and p-values are significant at  $p \leq 0.05$ ; those underlined with a solid line are negative and those underlined with a dashed line are positive.

**Supplementary Table 5.** Number of SNPs retained for each exposure in Mendelian randomization analyses and distribution of F-statistics.

| Exposure               | Number of SNPs     |                     |                 | F-statistic <sup>c</sup> |
|------------------------|--------------------|---------------------|-----------------|--------------------------|
|                        | Total <sup>a</sup> | Not available in PD | Retained for MR |                          |
| Smoking initiation     | 203                | 3                   | 182             | 205.75                   |
| Lifetime smoking index | 126                | 1                   | 113             | 20.03                    |
| Alcohol                | 71                 | 2                   | 62              | 73.68                    |
| Coffee                 | 11                 | -                   | 11              | 70.47                    |

<sup>a</sup> SNPs selected after clumping ( $r^2=0.001$ , genomic region=10,000 kb).

<sup>b</sup> Ambiguous palindromic SNPs with  $MAF \geq 0.42$ , SNPs with  $MAF < 0.01$ , or SNPs available in less than 17 studies.

<sup>c</sup> For each instrument, the F-statistic is given by the formula  $\left(\frac{n-k-1}{k}\right) \left(\frac{R^2}{1-R^2}\right)$ , with  $R^2$  the proportion of variance explained by the genetic variants,  $n$  the sample size, and  $k$  the number of instruments. (Burgess S et al., Int J Epidemiol 2011;40(3):755-64).



**Supplementary Table 6.** Mendelian randomization analyses stratified by age at study.

| Exposure                                                          | Age ≤ 67y<br>(2,878 cases; 2,944 controls) |       |        | Age > 67y<br>(3,208 cases; 2,728 controls) |      |        |
|-------------------------------------------------------------------|--------------------------------------------|-------|--------|--------------------------------------------|------|--------|
|                                                                   | OR <sub>IVW</sub> (95% CI)                 | p     | p-het. | OR <sub>IVW</sub> (95% CI)                 | p    | p-het. |
| Smoking initiation                                                | 0.68 (0.48-0.97)                           | 0.031 | 0.92   | 0.83 (0.58-1.18)                           | 0.29 | 0.50   |
| Lifetime smoking                                                  | 0.46 (0.19-1.09)                           | 0.077 | 0.66   | 0.88 (0.37-2.07)                           | 0.76 | 0.59   |
| Alcohol drinking                                                  | 0.51 (0.22-1.16)                           | 0.11  | 0.19   | 0.85 (0.39-1.83)                           | 0.68 | 0.93   |
| Alcohol drinking after exclusion of 2 SNPs associated with coffee | 0.61 (0.27-1.38)                           | 0.24  | 0.26   | 0.97 (0.44-2.13)                           | 0.94 | 0.94   |
| Coffee drinking                                                   | 1.15 (0.25-5.33)                           | 0.86  | 0.24   | 1.45 (0.34-6.14)                           | 0.62 | 0.44   |
| Coffee drinking after exclusion of 2 SNPs associated with alcohol | 0.53 (0.10-2.88)                           | 0.47  | 0.69   | 1.01 (0.19-5.42)                           | 0.99 | 0.52   |

OR, odds ratio; IVW, inverse-variance weighted; CI, confidence interval; p-het., p for heterogeneity; IVW, inverse variance weighted.

**Supplementary Table 7.** Mendelian randomization analyses stratified by disease duration in PD cases.

| Exposure                                                          | PD duration $\leq 7y$<br>(3,633 cases; 6,836 controls) |       |        | PD duration $> 7y$<br>(3,271 cases; 6,836 controls) |       |        |
|-------------------------------------------------------------------|--------------------------------------------------------|-------|--------|-----------------------------------------------------|-------|--------|
|                                                                   | OR <sub>IVW</sub> (95% CI)                             | p     | p-het. | OR <sub>IVW</sub> (95% CI)                          | p     | p-het. |
| Smoking initiation                                                | 0.70 (0.53-0.91)                                       | 0.009 | 0.59   | 0.74 (0.56-1.00)                                    | 0.046 | 0.46   |
| Lifetime smoking                                                  | 0.69 (0.32-1.48)                                       | 0.34  | 0.008  | 0.61 (0.29-1.30)                                    | 0.20  | 0.17   |
| Alcohol drinking                                                  | 0.81 (0.36-1.83)                                       | 0.61  | 0.032  | 0.53 (0.27-1.02)                                    | 0.057 | 0.36   |
| Alcohol drinking after exclusion of 2 SNPs associated with coffee | 1.03 (0.46-2.31)                                       | 0.95  | 0.075  | 0.59 (0.30-1.16)                                    | 0.13  | 0.38   |
| Coffee drinking                                                   | 1.77 (0.37-8.56)                                       | 0.48  | 0.066  | 1.53 (0.41-5.70)                                    | 0.52  | 0.17   |
| Coffee drinking after exclusion of 2 SNPs associated with alcohol | 0.55 (0.11-2.85)                                       | 0.48  | 0.31   | 1.05 (0.22-4.98)                                    | 0.95  | 0.24   |

OR, odds ratio; IVW, inverse-variance weighted; CI, confidence interval; p-het., p for heterogeneity; IVW, inverse variance weighted.

**Supplementary Table 8.** SNPs used for reverse Mendelian randomization analyses: individual associations with PD (exposure) and smoking, alcohol, and coffee drinking (outcomes).

| SNP                              | Chr:Pos (GRCh37) | EA/BA | PD (Nalls et al., 2019) |       |       | Outcome   |      |               | R <sup>2</sup> |                         |          |
|----------------------------------|------------------|-------|-------------------------|-------|-------|-----------|------|---------------|----------------|-------------------------|----------|
|                                  |                  |       | EAF                     | Beta  | SE    | p         | Beta | SE            |                | p                       |          |
| <b>Outcome: Alcohol drinking</b> |                  |       |                         |       |       |           |      |               |                |                         |          |
| rs35749011                       | 1:155135036      | A/G   | 0.02                    | 0.607 | 0.034 | 1.72E-70  | 0.01 | -0.002        | 0.008          | 7.80E-01                | 1.22E-02 |
| rs6658353                        | 1:161469054      | C/G   | 0.50                    | 0.065 | 0.009 | 6.10E-12  | 0.80 | 0.002         | 0.002          | Excluded for reverse MR | 1.56E-03 |
| rs11578699                       | 1:171719769      | C/T   | 0.81                    | 0.070 | 0.012 | 4.47E-09  | 0.55 | <b>0.008</b>  | <b>0.002</b>   | <b>3.21E-05</b>         | 5.58E-03 |
| rs823118                         | 1:205723572      | T/C   | 0.57                    | 0.107 | 0.009 | 1.11E-29  | 0.70 | <0.001        | 0.002          | 9.60E-01                | 2.80E-03 |
| rs4653767                        | 1:226916078      | T/C   | 0.72                    | 0.083 | 0.010 | 1.38E-15  | 0.14 | 0.001         | 0.003          | 7.80E-01                | 2.99E-03 |
| rs10797576                       | 1:232664611      | T/C   | 0.14                    | 0.111 | 0.013 | 6.84E-17  | 0.91 | 0.003         | 0.003          | 4.29E-01                | 2.11E-03 |
| rs76116224                       | 2:18147848       | A/T   | 0.90                    | 0.110 | 0.019 | 1.27E-08  | 0.75 | 0.001         | 0.002          | 8.15E-01                | 1.58E-03 |
| rs2042477                        | 2:96000943       | T/A   | 0.76                    | 0.066 | 0.012 | 1.38E-08  | 0.33 | 0.002         | 0.002          | 2.71E-01                | 2.22E-03 |
| rs11683001                       | 2:102396963      | A/T   | 0.34                    | 0.070 | 0.010 | 8.04E-13  | 0.69 | 0.001         | 0.002          | 7.86E-01                | 2.63E-03 |
| rs57891859                       | 2:135464616      | A/G   | 0.72                    | 0.081 | 0.011 | 4.55E-14  | 0.13 | 0.004         | 0.003          | 2.29E-01                | 7.35E-03 |
| rs1474055                        | 2:169110394      | T/C   | 0.13                    | 0.180 | 0.014 | 2.54E-39  | 0.04 | 0.008         | 0.005          | 1.07E-01                | 2.24E-03 |
| rs73038319                       | 3:18361759       | C/A   | 0.04                    | 0.169 | 0.024 | 5.94E-13  | 0.36 | 0.002         | 0.002          | 3.26E-01                | 2.04E-03 |
| rs6808178                        | 3:28705690       | T/C   | 0.38                    | 0.066 | 0.010 | 8.09E-12  | 0.64 | -0.001        | 0.002          | 5.16E-01                | 1.85E-03 |
| rs12497850                       | 3:48748989       | T/G   | 0.65                    | 0.064 | 0.010 | 1.36E-10  | 0.16 | 0.003         | 0.003          | 2.21E-01                | 2.11E-03 |
| rs55961674                       | 3:122196892      | T/C   | 0.17                    | 0.086 | 0.013 | 9.98E-12  | 0.64 | 0.003         | 0.002          | 9.36E-02                | 1.83E-03 |
| rs11707416                       | 3:151108965      | T/A   | 0.63                    | 0.063 | 0.010 | 1.13E-10  | 0.79 | 0.003         | 0.002          | 2.03E-01                | 6.75E-03 |
| rs10513789                       | 3:182760073      | T/G   | 0.81                    | 0.148 | 0.012 | 1.22E-34  | 0.18 | -0.004        | 0.003          | 1.03E-01                | 1.41E-02 |
| rs34311866                       | 4:951947         | C/T   | 0.19                    | 0.213 | 0.012 | 9.98E-70  | 0.54 | 0.003         | 0.002          | 1.84E-01                | 5.30E-03 |
| rs4698412                        | 4:15737348       | A/G   | 0.55                    | 0.104 | 0.009 | 2.06E-28  | 0.64 | <b>0.006</b>  | <b>0.002</b>   | <b>1.21E-03</b>         | 3.85E-03 |
| rs6854006                        | 4:77198054       | C/T   | 0.64                    | 0.091 | 0.010 | 5.82E-21  | 0.35 | <b>0.002</b>  | <b>0.002</b>   | <b>4.42E-01</b>         | 3.60E-02 |
| rs356182                         | 4:90626111       | G/A   | 0.37                    | 0.277 | 0.011 | 3.89E-154 | 0.16 | <b>-0.008</b> | <b>0.003</b>   | <b>3.76E-03</b>         | 2.20E-02 |
| rs13117519                       | 4:114369065      | T/C   | 0.17                    | 0.088 | 0.012 | 9.82E-13  | 0.67 | -0.001        | 0.002          | 7.06E-01                | 1.79E-03 |
| rs62333164                       | 4:170583157      | G/A   | 0.67                    | 0.064 | 0.010 | 2.00E-10  | 0.09 | -0.002        | 0.003          | 4.85E-01                | 4.27E-03 |
| rs1867598                        | 5:60137959       | G/A   | 0.10                    | 0.155 | 0.016 | 2.52E-23  | 0.70 | -0.002        | 0.002          | 3.76E-01                | 1.61E-03 |
| rs26431                          | 5:102365794      | C/G   | 0.70                    | 0.062 | 0.010 | 1.57E-09  | 0.88 | -0.003        | 0.003          | 3.20E-01                | 1.54E-03 |
| rs11950533                       | 5:134199105      | C/A   | 0.90                    | 0.092 | 0.016 | 7.16E-09  | 0.28 | 0.004         | 0.002          | 9.82E-02                | 1.76E-03 |
| rs12528068                       | 6:72487762       | T/C   | 0.28                    | 0.066 | 0.010 | 1.63E-10  | 0.79 | -0.001        | 0.003          | 7.74E-01                | 1.60E-03 |
| rs997368                         | 6:112243291      | A/G   | 0.80                    | 0.071 | 0.012 | 1.84E-09  | 0.03 | 0.005         | 0.006          | 3.97E-01                | 3.08E-03 |
| rs75859381                       | 6:133210361      | C/T   | 0.03                    | 0.221 | 0.034 | 1.04E-10  | 0.57 | <0.001        | 0.002          | 9.38E-01                | 4.98E-03 |
| rs199351                         | 7:23300049       | A/C   | 0.59                    | 0.102 | 0.010 | 5.25E-26  | 0.94 | <b>0.009</b>  | <b>0.004</b>   | <b>4.49E-02</b>         | 1.97E-03 |
| rs76949143                       | 7:66009851       | T/A   | 0.95                    | 0.143 | 0.025 | 1.43E-08  | 0.76 | -0.003        | 0.002          | 1.75E-01                | 3.29E-03 |
| rs1293298                        | 8:11712443       | A/C   | 0.74                    | 0.093 | 0.011 | 3.99E-16  | 0.35 | -0.004        | 0.002          | 5.44E-02                | 1.43E-03 |
| rs2280104                        | 8:22525980       | T/C   | 0.36                    | 0.056 | 0.010 | 1.16E-08  | 0.26 | -0.002        | 0.002          | 2.82E-01                | 1.47E-03 |
| rs2086641                        | 8:130901909      | C/T   | 0.28                    | 0.060 | 0.011 | 1.81E-08  | 0.63 | 0.001         | 0.002          | 6.44E-01                | 3.32E-03 |
| rs13294100                       | 9:17579690       | G/T   | 0.66                    | 0.086 | 0.010 | 8.72E-18  | 0.26 | <b>0.008</b>  | <b>0.002</b>   | <b>2.06E-04</b>         | 1.48E-03 |
| rs6476434                        | 9:34046391       | C/T   | 0.27                    | 0.062 | 0.011 | 6.58E-09  | 0.67 | -0.003        | 0.002          | 1.39E-01                | 2.31E-03 |
| rs896435                         | 10:15557406      | T/C   | 0.69                    | 0.074 | 0.010 | 3.41E-13  | 0.14 | <b>-0.006</b> | <b>0.003</b>   | <b>4.30E-02</b>         | 1.58E-03 |
| rs10748818                       | 10:104015279     | G/A   | 0.15                    | 0.079 | 0.013 | 1.05E-09  | 0.01 | 0.003         | 0.007          | 6.47E-01                | 6.19E-03 |
| rs117896735                      | 10:121536327     | A/G   | 0.02                    | 0.435 | 0.039 | 2.36E-28  |      |               |                |                         |          |

| SNP                             | Chr:Pos (GRCh37) | E/A/BA | PD (Nalls et al., 2019) |       |       |          | Outcome |                         |              |                 |                |
|---------------------------------|------------------|--------|-------------------------|-------|-------|----------|---------|-------------------------|--------------|-----------------|----------------|
|                                 |                  |        | EAF                     | Beta  | SE    | p        | EAF     | Beta                    | SE           | p               | R <sup>2</sup> |
| rs7938782                       | 11:10558777      | A/G    | 0.88                    | 0.087 | 0.015 | 2.12E-09 | 0.86    | 0.001                   | 0.003        | 7.58E-01        | 1.63E-03       |
| rs12283611                      | 11:83487277      | C/A    | 0.59                    | 0.064 | 0.010 | 2.61E-10 | 0.57    | -0.001                  | 0.002        | 5.01E-01        | 2.02E-03       |
| rs3802920                       | 11:133787001     | T/G    | 0.21                    | 0.107 | 0.012 | 6.26E-20 | 0.20    | 0.004                   | 0.002        | 1.10E-01        | 3.76E-03       |
| rs76904798                      | 12:40614434      | T/C    | 0.14                    | 0.144 | 0.013 | 1.52E-28 | 0.13    | 0.003                   | 0.003        | 3.17E-01        | 5.12E-03       |
| rs1734559                       | 12:46419086      | C/T    | 0.60                    | 0.054 | 0.010 | 3.96E-08 | 0.61    | <b>0.007</b>            | <b>0.002</b> | <b>4.06E-04</b> | 1.40E-03       |
| rs10847864                      | 12:12326598      | T/G    | 0.36                    | 0.148 | 0.012 | 1.47E-37 | 0.35    | 0.004                   | 0.002        | 8.08E-02        | 1.01E-02       |
| rs9568188                       | 13:49927732      | T/C    | 0.74                    | 0.062 | 0.011 | 1.15E-08 | 0.72    | <b>0.007</b>            | <b>0.002</b> | <b>8.55E-04</b> | 1.47E-03       |
| rs4771268                       | 13:97865021      | T/C    | 0.23                    | 0.068 | 0.011 | 1.45E-09 | 0.24    | 0.004                   | 0.002        | 5.31E-02        | 1.61E-03       |
| rs12147950                      | 14:37989270      | C/T    | 0.56                    | 0.053 | 0.010 | 3.54E-08 | 0.56    | 0.003                   | 0.002        | 1.74E-01        | 1.38E-03       |
| rs11158026                      | 14:55348869      | C/T    | 0.68                    | 0.084 | 0.010 | 1.66E-16 | 0.66    | -0.001                  | 0.002        | 7.35E-01        | 3.11E-03       |
| rs3742785                       | 14:75373034      | A/C    | 0.79                    | 0.071 | 0.012 | 1.92E-09 | 0.77    | -0.004                  | 0.002        | 1.27E-01        | 1.68E-03       |
| rs979812                        | 14:88464264      | T/G    | 0.44                    | 0.061 | 0.009 | 6.19E-11 | 0.44    | <b>0.004</b>            | <b>0.002</b> | <b>2.31E-02</b> | 1.84E-03       |
| rs2251086                       | 15:61997385      | C/T    | 0.86                    | 0.119 | 0.014 | 6.08E-18 | 0.84    | <b>0.008</b>            | <b>0.003</b> | <b>5.45E-03</b> | 3.42E-03       |
| rs6497339                       | 16:19277493      | A/T    | 0.45                    | 0.063 | 0.010 | 2.76E-11 |         | Excluded for reverse MR |              |                 |                |
| rs11150601                      | 16:30977799      | A/G    | 0.64                    | 0.091 | 0.010 | 5.12E-20 | 0.63    | <b>0.004</b>            | <b>0.002</b> | <b>3.90E-02</b> | 3.77E-03       |
| rs3104783                       | 16:52636242      | A/C    | 0.43                    | 0.067 | 0.009 | 1.29E-12 | 0.44    | -0.003                  | 0.002        | 1.95E-01        | 2.19E-03       |
| rs12600861                      | 17:7355621       | C/A    | 0.35                    | 0.056 | 0.010 | 1.01E-08 | 0.35    | -0.003                  | 0.002        | 1.04E-01        | 1.46E-03       |
| rs850738                        | 17:42434630      | G/A    | 0.39                    | 0.071 | 0.011 | 1.29E-11 | 0.39    | 0.003                   | 0.002        | 1.89E-01        | 2.41E-03       |
| rs62053943                      | 17:43744203      | C/T    | 0.84                    | 0.270 | 0.016 | 3.58E-68 | 0.86    | <b>0.017</b>            | <b>0.003</b> | <b>6.83E-10</b> | 1.91E-02       |
| rs61169879                      | 17:59917366      | T/C    | 0.16                    | 0.082 | 0.013 | 9.28E-10 | 0.17    | <b>0.005</b>            | <b>0.003</b> | <b>4.52E-02</b> | 1.84E-03       |
| rs666463                        | 17:76425480      | A/T    | 0.83                    | 0.076 | 0.013 | 3.20E-09 | 0.84    | <0.001                  | 0.003        | 9.20E-01        | 1.61E-03       |
| rs1941685                       | 18:31304318      | T/G    | 0.50                    | 0.053 | 0.009 | 1.69E-08 | 0.52    | <0.001                  | 0.002        | 8.23E-01        | 1.41E-03       |
| rs12456492                      | 18:40673380      | G/A    | 0.32                    | 0.098 | 0.010 | 3.80E-23 | 0.32    | <b>0.007</b>            | <b>0.002</b> | <b>9.12E-04</b> | 4.19E-03       |
| rs8087969                       | 18:48683589      | G/T    | 0.45                    | 0.058 | 0.010 | 1.41E-08 | 0.44    | 0.001                   | 0.002        | 4.92E-01        | 1.65E-03       |
| rs5818311                       | 19:2341047       | C/T    | 0.31                    | 0.070 | 0.011 | 4.18E-10 | 0.33    | 0.002                   | 0.002        | 2.27E-01        | 2.06E-03       |
| rs77351827                      | 20:6006041       | T/C    | 0.13                    | 0.080 | 0.014 | 8.87E-09 | 0.12    | -0.001                  | 0.003        | 8.50E-01        | 1.43E-03       |
| rs2248244                       | 21:38852361      | A/G    | 0.28                    | 0.071 | 0.011 | 2.74E-11 | 0.28    | -0.003                  | 0.002        | 1.28E-01        | 2.07E-03       |
| <b>Outcome: Coffee drinking</b> |                  |        |                         |       |       |          |         |                         |              |                 |                |
| rs35749011                      | 1:155135036      | A/G    | 0.02                    | 0.607 | 0.034 | 1.72E-70 | 0.01    | <0.001                  | 0.007        | 9.60E-01        | 1.22E-02       |
| rs6658353                       | 1:161469054      | C/G    | 0.50                    | 0.065 | 0.009 | 6.10E-12 |         | Excluded for reverse MR |              |                 |                |
| rs11578699                      | 1:171719769      | C/T    | 0.81                    | 0.070 | 0.012 | 4.47E-09 | 0.80    | 0.002                   | 0.002        | 4.16E-01        | 1.56E-03       |
| rs823118                        | 1:205723572      | T/C    | 0.57                    | 0.107 | 0.009 | 1.11E-29 | 0.55    | -0.001                  | 0.002        | 3.79E-01        | 5.58E-03       |
| rs4653767                       | 1:226916078      | T/C    | 0.72                    | 0.083 | 0.010 | 1.38E-15 | 0.72    | <0.001                  | 0.002        | 8.75E-01        | 2.80E-03       |
| rs10797576                      | 1:232664611      | T/C    | 0.14                    | 0.111 | 0.013 | 6.84E-17 | 0.12    | -0.002                  | 0.002        | 3.16E-01        | 2.99E-03       |
| rs76116224                      | 2:18147848       | A/T    | 0.90                    | 0.110 | 0.019 | 1.27E-08 | 0.90    | -0.002                  | 0.003        | 3.66E-01        | 2.11E-03       |
| rs2042477                       | 2:96000943       | T/A    | 0.76                    | 0.066 | 0.012 | 1.38E-08 | 0.74    | 0.002                   | 0.002        | 1.90E-01        | 1.58E-03       |
| rs11683001                      | 2:102396963      | A/T    | 0.34                    | 0.070 | 0.010 | 8.04E-13 | 0.34    | <0.001                  | 0.002        | 7.90E-01        | 2.22E-03       |
| rs57891859                      | 2:135464616      | A/G    | 0.72                    | 0.081 | 0.011 | 4.55E-14 | 0.75    | 0.002                   | 0.002        | 3.94E-01        | 2.63E-03       |
| rs1474055                       | 2:169110394      | T/C    | 0.13                    | 0.180 | 0.014 | 2.54E-39 | 0.12    | 0.003                   | 0.002        | 2.51E-01        | 7.35E-03       |
| rs73038319                      | 3:18361759       | C/A    | 0.04                    | 0.169 | 0.024 | 5.94E-13 | 0.04    | <0.001                  | 0.004        | 9.15E-01        | 2.24E-03       |
| rs6808178                       | 3:28705690       | T/C    | 0.38                    | 0.066 | 0.010 | 8.09E-12 | 0.38    | 0.001                   | 0.002        | 4.74E-01        | 2.04E-03       |
| rs12497850                      | 3:48748989       | T/G    | 0.65                    | 0.064 | 0.010 | 1.36E-10 | 0.65    | <b>0.004</b>            | <b>0.002</b> | <b>6.44E-03</b> | 1.85E-03       |

| SNP         | Chr:Pos (GRCh37) | E/A/BA | PD (Nalls et al., 2019) |       |       |           | Outcome |               |              |                 |          |
|-------------|------------------|--------|-------------------------|-------|-------|-----------|---------|---------------|--------------|-----------------|----------|
|             |                  |        | EAF                     | Beta  | SE    | p         | EAF     | Beta          | SE           | R <sup>2</sup>  |          |
| rs55961674  | 3:122196892      | T/C    | 0.17                    | 0.086 | 0.013 | 9.98E-12  | 0.15    | 0.002         | 0.002        | 3.26E-01        | 2.11E-03 |
| rs11707416  | 3:151108965      | T/A    | 0.63                    | 0.063 | 0.010 | 1.13E-10  | 0.63    | -0.001        | 0.002        | 5.21E-01        | 1.83E-03 |
| rs10513789  | 3:182760073      | T/A    | 0.81                    | 0.148 | 0.012 | 1.22E-34  | 0.81    | <0.001        | 0.002        | 9.52E-01        | 6.75E-02 |
| rs34311866  | 4:951947         | C/T    | 0.19                    | 0.213 | 0.012 | 9.98E-70  | 0.18    | 0.001         | 0.002        | 6.12E-01        | 1.41E-02 |
| rs4698412   | 4:15737348       | A/G    | 0.55                    | 0.104 | 0.009 | 2.06E-28  | 0.55    | <0.001        | 0.002        | 8.79E-01        | 5.30E-03 |
| rs6854006   | 4:77198054       | C/T    | 0.64                    | 0.091 | 0.010 | 5.82E-21  | 0.62    | -0.001        | 0.002        | 7.34E-01        | 3.85E-03 |
| rs356182    | 4:90626111       | G/A    | 0.37                    | 0.277 | 0.011 | 3.89E-154 | 0.34    | <0.001        | 0.002        | 8.71E-01        | 3.60E-02 |
| rs13117519  | 4:114369065      | T/C    | 0.17                    | 0.088 | 0.012 | 9.82E-13  | 0.17    | -0.001        | 0.002        | 6.43E-01        | 2.20E-03 |
| rs62333164  | 4:170583157      | G/A    | 0.67                    | 0.064 | 0.010 | 2.00E-10  | 0.67    | 0.002         | 0.002        | 2.01E-01        | 1.79E-03 |
| rs1867598   | 5:60137959       | G/A    | 0.10                    | 0.155 | 0.016 | 2.52E-23  | 0.08    | <b>0.007</b>  | <b>0.003</b> | <b>2.38E-02</b> | 4.27E-03 |
| rs26431     | 5:102365794      | C/G    | 0.70                    | 0.062 | 0.010 | 1.57E-09  | 0.69    | -0.001        | 0.002        | 3.83E-01        | 1.61E-03 |
| rs11950533  | 5:134199105      | C/A    | 0.90                    | 0.092 | 0.016 | 7.16E-09  | 0.90    | 0.003         | 0.003        | 2.36E-01        | 1.54E-03 |
| rs112485576 | 6:32578772       | C/A    | 0.84                    | 0.168 | 0.015 | 6.96E-28  | 0.81    | <b>0.005</b>  | <b>0.002</b> | <b>1.63E-02</b> | 7.66E-03 |
| rs12528068  | 6:72487762       | T/C    | 0.28                    | 0.066 | 0.010 | 1.63E-10  | 0.28    | 0.003         | 0.002        | 1.28E-01        | 1.76E-03 |
| rs997368    | 6:112243291      | A/G    | 0.80                    | 0.071 | 0.012 | 1.84E-09  | 0.82    | 0.003         | 0.002        | 1.87E-01        | 1.60E-03 |
| rs75859381  | 6:133210361      | C/T    | 0.03                    | 0.221 | 0.034 | 1.04E-10  | 0.03    | 0.001         | 0.005        | 8.48E-01        | 3.08E-03 |
| rs199351    | 7:23300049       | A/C    | 0.59                    | 0.102 | 0.010 | 5.25E-26  | 0.59    | -0.001        | 0.002        | 5.75E-01        | 4.98E-03 |
| rs76949143  | 7:66009851       | T/A    | 0.95                    | 0.143 | 0.025 | 1.43E-08  | 0.95    | -0.004        | 0.004        | 2.38E-01        | 1.97E-03 |
| rs1293298   | 8:11712443       | A/C    | 0.74                    | 0.093 | 0.011 | 3.99E-16  | 0.74    | <b>0.004</b>  | <b>0.002</b> | <b>3.34E-02</b> | 3.29E-03 |
| rs2280104   | 8:22525980       | T/C    | 0.36                    | 0.056 | 0.010 | 1.16E-08  | 0.35    | -0.001        | 0.002        | 4.61E-01        | 1.43E-03 |
| rs2086641   | 8:130901909      | C/T    | 0.28                    | 0.060 | 0.011 | 1.81E-08  | 0.26    | <0.001        | 0.002        | 8.43E-01        | 1.47E-03 |
| rs13294100  | 9:17579690       | G/T    | 0.66                    | 0.086 | 0.010 | 8.72E-18  | 0.65    | 0.001         | 0.002        | 6.77E-01        | 3.32E-03 |
| rs6476434   | 9:34046391       | C/T    | 0.27                    | 0.062 | 0.011 | 6.58E-09  | 0.27    | -0.001        | 0.002        | 4.28E-01        | 1.48E-03 |
| rs896435    | 10:15557406      | T/C    | 0.69                    | 0.074 | 0.010 | 3.41E-13  | 0.68    | 0.002         | 0.002        | 3.35E-01        | 2.31E-03 |
| rs10748818  | 10:104015279     | G/A    | 0.15                    | 0.079 | 0.013 | 1.05E-09  | 0.15    | -0.001        | 0.002        | 8.14E-01        | 1.58E-03 |
| rs117896735 | 10:121536327     | A/G    | 0.02                    | 0.435 | 0.039 | 2.36E-28  | 0.02    | -0.002        | 0.006        | 7.05E-01        | 6.19E-03 |
| rs7938782   | 11:10558777      | A/G    | 0.88                    | 0.087 | 0.015 | 2.12E-09  | 0.88    | <b>0.007</b>  | <b>0.002</b> | <b>3.36E-03</b> | 1.63E-03 |
| rs12283611  | 11:83487277      | C/A    | 0.59                    | 0.064 | 0.010 | 2.61E-10  | 0.59    | 0.001         | 0.002        | 6.20E-01        | 2.02E-03 |
| rs3802920   | 11:133787001     | T/G    | 0.21                    | 0.107 | 0.012 | 6.26E-20  | 0.20    | -0.002        | 0.002        | 2.51E-01        | 3.76E-03 |
| rs76904798  | 12:40614434      | T/C    | 0.14                    | 0.144 | 0.013 | 1.52E-28  | 0.14    | -0.003        | 0.002        | 2.09E-01        | 5.12E-03 |
| rs7134559   | 12:46419086      | C/T    | 0.60                    | 0.054 | 0.010 | 3.96E-08  | 0.60    | 0.001         | 0.002        | 4.01E-01        | 1.40E-03 |
| rs10847864  | 12:123326598     | T/G    | 0.36                    | 0.148 | 0.012 | 1.47E-37  | 0.35    | -0.001        | 0.002        | 3.89E-01        | 1.01E-02 |
| rs9568188   | 13:49927732      | T/C    | 0.74                    | 0.062 | 0.011 | 1.15E-08  | 0.73    | <0.001        | 0.002        | 7.92E-01        | 1.47E-03 |
| rs4771268   | 13:97865021      | T/C    | 0.23                    | 0.068 | 0.011 | 1.45E-09  | 0.22    | <0.001        | 0.002        | 8.36E-01        | 1.61E-03 |
| rs12147950  | 14:37989270      | C/T    | 0.56                    | 0.053 | 0.010 | 3.54E-08  | 0.57    | 0.001         | 0.002        | 4.10E-01        | 1.38E-03 |
| rs11158026  | 14:55348869      | C/T    | 0.68                    | 0.084 | 0.010 | 1.66E-16  | 0.66    | 0.002         | 0.002        | 2.33E-01        | 3.11E-03 |
| rs3742785   | 14:75373034      | A/C    | 0.79                    | 0.071 | 0.012 | 1.92E-09  | 0.78    | <b>-0.005</b> | <b>0.002</b> | <b>1.13E-02</b> | 1.68E-03 |
| rs979812    | 14:88464264      | T/G    | 0.44                    | 0.061 | 0.009 | 6.19E-11  | 0.42    | -0.001        | 0.002        | 4.81E-01        | 1.84E-03 |
| rs2251086   | 15:61997385      | C/T    | 0.86                    | 0.119 | 0.014 | 6.08E-18  | 0.86    | 0.004         | 0.002        | 7.31E-02        | 3.42E-03 |
| rs6497339   | 16:19277493      | A/T    | 0.45                    | 0.063 | 0.010 | 2.76E-11  |         |               |              |                 |          |
| rs11150601  | 16:30977799      | A/G    | 0.64                    | 0.091 | 0.010 | 5.12E-20  | 0.63    | -0.001        | 0.002        | 6.47E-01        | 3.77E-03 |
| rs3104783   | 16:52636242      | A/C    | 0.43                    | 0.067 | 0.009 | 1.29E-12  | 0.41    | <0.001        | 0.002        | 9.08E-01        | 2.19E-03 |
| rs12600861  | 17:7355621       | C/A    | 0.35                    | 0.056 | 0.010 | 1.01E-08  | 0.36    | <0.001        | 0.002        | 7.89E-01        | 1.46E-03 |

Excluded for reverse MR

| SNP                                    | Chr:Pos (GRCh37) | E/A/BA | PD (Nalls et al., 2019) |       |       |           | Outcome                 |               |              |                 |          |
|----------------------------------------|------------------|--------|-------------------------|-------|-------|-----------|-------------------------|---------------|--------------|-----------------|----------|
|                                        |                  |        | EAF                     | Beta  | SE    | p         | EAF                     | Beta          | SE           | R <sup>2</sup>  |          |
| rs850738                               | 17:42434630      | G/A    | 0.39                    | 0.071 | 0.011 | 1.29E-11  | 0.39                    | 0.002         | 0.002        | 1.81E-01        | 2.41E-03 |
| rs62053943                             | 17:43744203      | C/T    | 0.84                    | 0.270 | 0.016 | 3.58E-68  | 0.84                    | -0.001        | 0.002        | 6.85E-01        | 1.91E-02 |
| rs61169879                             | 17:59917366      | T/C    | 0.16                    | 0.082 | 0.013 | 9.28E-10  | 0.16                    | <b>0.012</b>  | <b>0.002</b> | <b>4.00E-08</b> | 1.84E-03 |
| rs666463                               | 17:76425480      | A/T    | 0.83                    | 0.076 | 0.013 | 3.20E-09  | 0.83                    | 0.001         | 0.002        | 6.75E-01        | 1.61E-03 |
| rs1941685                              | 18:31304318      | T/G    | 0.50                    | 0.053 | 0.009 | 1.69E-08  | 0.50                    | <0.001        | 0.002        | 9.46E-01        | 1.41E-03 |
| rs12456492                             | 18:40673380      | G/A    | 0.32                    | 0.098 | 0.010 | 3.80E-23  | 0.31                    | <b>-0.005</b> | <b>0.002</b> | <b>1.98E-03</b> | 4.19E-03 |
| rs8087969                              | 18:48683589      | G/T    | 0.45                    | 0.058 | 0.010 | 1.41E-08  | 0.46                    | <0.001        | 0.002        | 9.20E-01        | 1.65E-03 |
| rs55818311                             | 19:2341047       | C/T    | 0.31                    | 0.070 | 0.011 | 4.18E-10  | 0.32                    | 0.001         | 0.002        | 4.97E-01        | 2.06E-03 |
| rs77351827                             | 20:6006041       | T/C    | 0.13                    | 0.080 | 0.014 | 8.87E-09  | 0.12                    | 0.001         | 0.002        | 7.28E-01        | 1.43E-03 |
| rs2248244                              | 21:38852361      | A/G    | 0.28                    | 0.071 | 0.011 | 2.74E-11  | 0.28                    | <b>0.006</b>  | <b>0.002</b> | <b>3.86E-04</b> | 2.07E-03 |
| <b>Outcome: Lifetime smoking index</b> |                  |        |                         |       |       |           |                         |               |              |                 |          |
| rs35749011                             | 1:155135036      | A/G    | 0.02                    | 0.607 | 0.034 | 1.72E-70  | 0.01                    | -0.005        | 0.006        | 4.10E-01        | 1.22E-02 |
| rs6658353                              | 1:161469054      | C/G    | 0.50                    | 0.065 | 0.009 | 6.10E-12  | Excluded for reverse MR |               |              |                 | 1.56E-03 |
| rs11578699                             | 1:171719769      | C/T    | 0.81                    | 0.070 | 0.012 | 4.47E-09  | 0.80                    | -0.001        | 0.002        | 6.90E-01        | 1.56E-03 |
| rs823118                               | 1:205723572      | T/C    | 0.57                    | 0.107 | 0.009 | 1.11E-29  | 0.55                    | <b>0.004</b>  | <b>0.001</b> | <b>6.50E-03</b> | 5.58E-03 |
| rs4653767                              | 1:226916078      | T/C    | 0.72                    | 0.083 | 0.010 | 1.38E-15  | 0.72                    | -0.001        | 0.002        | 3.60E-01        | 2.80E-03 |
| rs10797576                             | 1:232664611      | T/C    | 0.14                    | 0.111 | 0.013 | 6.84E-17  | 0.12                    | <b>0.006</b>  | <b>0.002</b> | <b>8.50E-03</b> | 2.99E-03 |
| rs76116224                             | 2:18147848       | A/T    | 0.90                    | 0.110 | 0.019 | 1.27E-08  | 0.90                    | <0.001        | 0.002        | 8.60E-01        | 2.11E-03 |
| rs2042477                              | 2:96000943       | T/A    | 0.76                    | 0.066 | 0.012 | 1.38E-08  | 0.74                    | -0.001        | 0.002        | 7.10E-01        | 1.58E-03 |
| rs11683001                             | 2:102396963      | A/T    | 0.34                    | 0.070 | 0.010 | 8.04E-13  | 0.34                    | <b>0.004</b>  | <b>0.001</b> | <b>5.00E-03</b> | 2.22E-03 |
| rs57891859                             | 2:135464616      | A/G    | 0.72                    | 0.081 | 0.011 | 4.55E-14  | 0.75                    | <0.001        | 0.002        | 7.80E-01        | 2.63E-03 |
| rs1474055                              | 2:169110394      | T/C    | 0.13                    | 0.180 | 0.014 | 2.54E-39  | 0.12                    | 0.004         | 0.002        | 6.00E-02        | 7.35E-03 |
| rs73038319                             | 3:18361759       | C/A    | 0.04                    | 0.169 | 0.024 | 5.94E-13  | 0.04                    | 0.005         | 0.004        | 1.90E-01        | 2.24E-03 |
| rs6808178                              | 3:28705690       | T/C    | 0.38                    | 0.066 | 0.010 | 8.09E-12  | 0.38                    | 0.001         | 0.001        | 6.30E-01        | 2.04E-03 |
| rs12497850                             | 3:48748989       | T/C    | 0.65                    | 0.065 | 0.010 | 1.36E-10  | 0.65                    | <b>-0.006</b> | <b>0.001</b> | <b>1.50E-05</b> | 1.85E-03 |
| rs55961674                             | 3:122196892      | T/C    | 0.17                    | 0.086 | 0.013 | 9.98E-12  | 0.15                    | 0.002         | 0.002        | 2.40E-01        | 2.11E-03 |
| rs11707416                             | 3:151108965      | T/A    | 0.63                    | 0.063 | 0.010 | 1.13E-10  | 0.63                    | <b>0.003</b>  | <b>0.001</b> | <b>2.20E-02</b> | 1.83E-03 |
| rs10513789                             | 3:182760073      | T/G    | 0.81                    | 0.148 | 0.012 | 1.22E-34  | 0.81                    | <b>0.003</b>  | <b>0.002</b> | <b>4.80E-02</b> | 6.75E-03 |
| rs34311866                             | 4:951947         | C/T    | 0.19                    | 0.213 | 0.012 | 9.98E-70  | 0.18                    | <0.001        | 0.002        | 8.90E-01        | 1.41E-02 |
| rs4698412                              | 4:15737348       | A/G    | 0.55                    | 0.104 | 0.009 | 2.06E-28  | 0.55                    | -0.001        | 0.001        | 3.10E-01        | 5.30E-03 |
| rs6854006                              | 4:77198054       | C/T    | 0.64                    | 0.091 | 0.010 | 5.82E-21  | 0.62                    | <b>-0.004</b> | <b>0.001</b> | <b>6.00E-03</b> | 3.85E-03 |
| rs356182                               | 4:90626111       | G/A    | 0.37                    | 0.277 | 0.011 | 3.89E-154 | 0.34                    | -0.001        | 0.001        | 6.20E-01        | 3.60E-02 |
| rs13117519                             | 4:114369065      | T/C    | 0.17                    | 0.088 | 0.012 | 9.82E-13  | 0.17                    | 0.001         | 0.002        | 5.40E-01        | 2.20E-03 |
| rs62333164                             | 4:170583157      | G/A    | 0.67                    | 0.064 | 0.010 | 2.00E-10  | 0.67                    | -0.001        | 0.001        | 4.00E-01        | 1.79E-03 |
| rs1867598                              | 5:60137959       | G/A    | 0.10                    | 0.155 | 0.016 | 2.52E-23  | 0.08                    | 0.002         | 0.003        | 5.60E-01        | 4.27E-03 |
| rs26431                                | 5:102365794      | C/G    | 0.70                    | 0.062 | 0.010 | 1.57E-09  | 0.69                    | -0.002        | 0.002        | 2.60E-01        | 1.61E-03 |
| rs11950533                             | 5:134199105      | C/A    | 0.90                    | 0.092 | 0.016 | 7.16E-09  | 0.90                    | -0.003        | 0.002        | 1.50E-01        | 1.54E-03 |
| rs112485576                            | 6:32578772       | T/C    | 0.84                    | 0.168 | 0.015 | 6.96E-28  | 0.81                    | -0.002        | 0.002        | 3.00E-01        | 7.66E-03 |
| rs12528068                             | 6:72487762       | C/A    | 0.28                    | 0.066 | 0.010 | 1.63E-10  | 0.28                    | -0.001        | 0.002        | 6.20E-01        | 1.76E-03 |
| rs997368                               | 6:112243291      | A/G    | 0.80                    | 0.071 | 0.012 | 1.84E-09  | 0.82                    | 0.002         | 0.002        | 2.30E-01        | 1.60E-03 |
| rs75859381                             | 6:133210361      | C/T    | 0.03                    | 0.221 | 0.034 | 1.04E-10  | 0.03                    | -0.002        | 0.004        | 6.90E-01        | 3.08E-03 |
| rs199351                               | 7:23300049       | A/C    | 0.59                    | 0.102 | 0.010 | 5.25E-26  | 0.59                    | -0.001        | 0.001        | 3.70E-01        | 4.98E-03 |

| SNP                                | Chr:Pos (GRCh37) | E/A/BA | PD (Nalls et al., 2019) |       |       |          | Outcome |               |              |                 |                |
|------------------------------------|------------------|--------|-------------------------|-------|-------|----------|---------|---------------|--------------|-----------------|----------------|
|                                    |                  |        | EAF                     | Beta  | SE    | p        | EAF     | Beta          | SE           | p               | R <sup>2</sup> |
| rs76949143                         | 7:66009851       | T/A    | 0.95                    | 0.143 | 0.025 | 1.43E-08 | 0.95    | 0.005         | 0.003        | 1.30E-01        | 1.97E-03       |
| rs1293298                          | 8:11712443       | A/C    | 0.74                    | 0.093 | 0.011 | 3.99E-16 | 0.74    | <b>0.005</b>  | <b>0.002</b> | <b>2.20E-03</b> | 3.29E-03       |
| rs2280104                          | 8:22525980       | T/C    | 0.36                    | 0.056 | 0.010 | 1.16E-08 | 0.35    | <b>-0.004</b> | <b>0.001</b> | <b>1.10E-02</b> | 1.43E-03       |
| rs2086641                          | 8:130901909      | C/T    | 0.28                    | 0.060 | 0.011 | 1.81E-08 | 0.26    | -0.002        | 0.002        | 1.70E-01        | 1.47E-03       |
| rs13294100                         | 9:17579690       | G/T    | 0.66                    | 0.086 | 0.010 | 8.72E-18 | 0.65    | <b>0.005</b>  | <b>0.001</b> | <b>2.00E-03</b> | 3.32E-03       |
| rs6476434                          | 9:34046391       | C/T    | 0.27                    | 0.062 | 0.011 | 6.58E-09 | 0.27    | 0.001         | 0.002        | 6.50E-01        | 1.48E-03       |
| rs896435                           | 10:15557406      | T/C    | 0.69                    | 0.074 | 0.010 | 3.41E-13 | 0.68    | <0.001        | 0.001        | 8.30E-01        | 2.31E-03       |
| rs10748818                         | 10:104015279     | G/A    | 0.15                    | 0.079 | 0.013 | 1.05E-09 | 0.15    | <b>-0.006</b> | <b>0.002</b> | <b>3.40E-03</b> | 1.58E-03       |
| rs117896735                        | 10:121536327     | A/G    | 0.02                    | 0.435 | 0.039 | 2.36E-28 | 0.02    | -0.007        | 0.005        | 2.20E-01        | 6.19E-03       |
| rs7938782                          | 11:10558777      | A/G    | 0.88                    | 0.087 | 0.015 | 2.12E-09 | 0.88    | <0.001        | 0.002        | 8.50E-01        | 1.63E-03       |
| rs12283611                         | 11:83487277      | C/A    | 0.59                    | 0.064 | 0.010 | 2.61E-10 | 0.59    | -0.001        | 0.001        | 4.40E-01        | 2.02E-03       |
| rs3802920                          | 11:133787001     | T/G    | 0.21                    | 0.107 | 0.012 | 6.26E-20 | 0.20    | -0.002        | 0.002        | 2.90E-01        | 3.76E-03       |
| rs76904798                         | 12:40614434      | T/C    | 0.14                    | 0.144 | 0.013 | 1.52E-28 | 0.14    | -0.002        | 0.002        | 2.70E-01        | 5.12E-03       |
| rs7134559                          | 12:46419086      | C/T    | 0.60                    | 0.054 | 0.010 | 3.96E-08 | 0.60    | <0.001        | 0.001        | 8.10E-01        | 1.40E-03       |
| rs10847864                         | 12:123326598     | T/G    | 0.36                    | 0.148 | 0.012 | 1.47E-37 | 0.35    | -0.002        | 0.001        | 2.10E-01        | 1.01E-02       |
| rs9568188                          | 13:49927732      | T/C    | 0.74                    | 0.062 | 0.011 | 1.15E-08 | 0.73    | -0.001        | 0.002        | 5.80E-01        | 1.47E-03       |
| rs4771268                          | 13:97865021      | T/C    | 0.23                    | 0.068 | 0.011 | 1.45E-09 | 0.22    | 0.001         | 0.002        | 5.90E-01        | 1.61E-03       |
| rs12147950                         | 14:37989270      | C/T    | 0.56                    | 0.053 | 0.010 | 3.54E-08 | 0.57    | 0.002         | 0.001        | 1.90E-01        | 1.38E-03       |
| rs11158026                         | 14:55348869      | C/T    | 0.68                    | 0.084 | 0.010 | 1.66E-16 | 0.66    | -0.002        | 0.001        | 2.50E-01        | 3.11E-03       |
| rs3742785                          | 14:75373034      | A/C    | 0.79                    | 0.071 | 0.012 | 1.92E-09 | 0.78    | -0.002        | 0.002        | 1.60E-01        | 1.68E-03       |
| rs979812                           | 14:88464264      | T/G    | 0.44                    | 0.061 | 0.009 | 6.19E-11 | 0.42    | <0.001        | 0.001        | 8.90E-01        | 1.84E-03       |
| rs2251086                          | 15:61997385      | C/T    | 0.86                    | 0.119 | 0.014 | 6.08E-18 | 0.86    | -0.003        | 0.002        | 7.80E-02        | 3.42E-03       |
| rs6497339                          | 16:19277493      | A/T    | 0.45                    | 0.063 | 0.010 | 2.76E-11 | 0.63    | <b>-0.004</b> | <b>0.001</b> | <b>1.30E-02</b> | 3.77E-03       |
| rs11150601                         | 16:30977799      | A/G    | 0.64                    | 0.091 | 0.010 | 5.12E-20 | 0.42    | 0.001         | 0.001        | 3.10E-01        | 2.19E-03       |
| rs3104783                          | 16:52636242      | A/C    | 0.43                    | 0.067 | 0.009 | 1.29E-12 | 0.36    | <b>-0.005</b> | <b>0.001</b> | <b>1.40E-03</b> | 1.46E-03       |
| rs12600861                         | 17:7355621       | C/A    | 0.35                    | 0.056 | 0.010 | 1.01E-08 | 0.39    | 0.002         | 0.001        | 2.00E-01        | 2.41E-03       |
| rs850738                           | 17:42434630      | G/A    | 0.39                    | 0.071 | 0.011 | 1.29E-11 | 0.85    | <b>0.006</b>  | <b>0.002</b> | <b>8.50E-04</b> | 1.91E-02       |
| rs62053943                         | 17:43744203      | C/T    | 0.84                    | 0.270 | 0.016 | 3.58E-68 | 0.16    | -0.001        | 0.002        | 7.00E-01        | 1.84E-03       |
| rs61169879                         | 17:59917366      | T/C    | 0.16                    | 0.082 | 0.013 | 9.28E-10 | 0.16    | -0.001        | 0.002        | 2.10E-01        | 1.61E-03       |
| rs666463                           | 17:76425480      | A/T    | 0.83                    | 0.076 | 0.013 | 3.20E-09 | 0.83    | 0.002         | 0.002        | 2.10E-01        | 1.61E-03       |
| rs1941685                          | 18:31304318      | T/G    | 0.50                    | 0.053 | 0.009 | 1.69E-08 | 0.50    | -0.002        | 0.001        | 1.90E-01        | 1.41E-03       |
| rs12456492                         | 18:40673380      | G/A    | 0.32                    | 0.098 | 0.010 | 3.80E-23 | 0.31    | <b>-0.003</b> | <b>0.001</b> | <b>2.80E-02</b> | 4.19E-03       |
| rs8087969                          | 18:48683589      | G/T    | 0.45                    | 0.058 | 0.010 | 1.41E-08 | 0.46    | -0.001        | 0.001        | 4.40E-01        | 1.65E-03       |
| rs5818311                          | 19:2341047       | C/T    | 0.31                    | 0.070 | 0.011 | 4.18E-10 | 0.32    | -0.001        | 0.002        | 4.00E-01        | 2.06E-03       |
| rs77351827                         | 20:6006041       | T/C    | 0.13                    | 0.080 | 0.014 | 8.87E-09 | 0.12    | <b>0.005</b>  | <b>0.002</b> | <b>2.50E-02</b> | 1.43E-03       |
| rs2248244                          | 21:38852361      | A/G    | 0.28                    | 0.071 | 0.011 | 2.74E-11 | 0.28    | -0.001        | 0.002        | 3.60E-01        | 2.07E-03       |
| <b>Outcome: Smoking initiation</b> |                  |        |                         |       |       |          |         |               |              |                 |                |
| rs35749011                         | 1:155135036      | A/G    | 0.02                    | 0.607 | 0.034 | 1.72E-70 | 0.01    | 0.011         | 0.015        | 4.50E-01        | 1.22E-02       |
| rs6658353                          | 1:161469054      | C/G    | 0.50                    | 0.065 | 0.009 | 6.10E-12 | 0.80    | 0.006         | 0.005        | 1.70E-01        | 1.56E-03       |
| rs11578699                         | 1:171719769      | C/T    | 0.81                    | 0.070 | 0.012 | 4.47E-09 | 0.55    | <b>0.011</b>  | <b>0.004</b> | <b>2.75E-03</b> | 5.58E-03       |
| rs823118                           | 1:205723572      | T/C    | 0.57                    | 0.107 | 0.009 | 1.11E-29 | 0.70    | 0.002         | 0.004        | 5.68E-01        | 2.80E-03       |
| rs4653767                          | 1:226916078      | T/C    | 0.72                    | 0.083 | 0.010 | 1.38E-15 |         |               |              |                 |                |

| SNP         | Chr:Pos (GRCh37) | E/A/BA | PD (Nalls et al., 2019) |       |       |           | Outcome |               |              |                 |                |
|-------------|------------------|--------|-------------------------|-------|-------|-----------|---------|---------------|--------------|-----------------|----------------|
|             |                  |        | EAF                     | Beta  | SE    | p         | EAF     | Beta          | SE           | p               | R <sup>2</sup> |
| rs10297576  | 1:232664611      | T/C    | 0.14                    | 0.111 | 0.013 | 6.84E-17  | 0.14    | 0.009         | 0.005        | 9.08E-02        | 2.99E-03       |
| rs76116224  | 2:18147848       | A/T    | 0.90                    | 0.110 | 0.019 | 1.27E-08  | 0.91    | 0.006         | 0.006        | 3.06E-01        | 2.11E-03       |
| rs2042477   | 2:96000943       | T/A    | 0.76                    | 0.066 | 0.012 | 1.38E-08  | 0.75    | 0.002         | 0.004        | 5.47E-01        | 1.58E-03       |
| rs11683001  | 2:102396963      | A/T    | 0.34                    | 0.070 | 0.010 | 8.04E-13  | 0.33    | 0.007         | 0.004        | 5.86E-02        | 2.22E-03       |
| rs57891859  | 2:135464616      | A/G    | 0.72                    | 0.081 | 0.011 | 4.55E-14  | 0.69    | -0.003        | 0.004        | 5.19E-01        | 2.63E-03       |
| rs1474055   | 2:169110394      | T/C    | 0.13                    | 0.180 | 0.014 | 2.54E-39  | 0.13    | <b>0.013</b>  | <b>0.006</b> | <b>1.86E-02</b> | 7.35E-03       |
| rs73038319  | 3:18361759       | C/A    | 0.04                    | 0.169 | 0.024 | 5.94E-13  | 0.04    | 0.014         | 0.009        | 1.15E-01        | 2.24E-03       |
| rs6808178   | 3:28705690       | T/C    | 0.38                    | 0.066 | 0.010 | 8.09E-12  | 0.36    | -0.004        | 0.004        | 2.59E-01        | 2.04E-03       |
| rs12497850  | 3:48748989       | T/G    | 0.65                    | 0.064 | 0.010 | 1.36E-10  | 0.64    | <b>-0.012</b> | <b>0.004</b> | <b>1.76E-03</b> | 1.85E-03       |
| rs55961674  | 3:122196892      | T/C    | 0.17                    | 0.086 | 0.013 | 9.98E-12  | 0.16    | 0.003         | 0.005        | 5.79E-01        | 2.11E-03       |
| rs11707416  | 3:151108965      | T/A    | 0.63                    | 0.063 | 0.010 | 1.13E-10  | 0.64    | <0.001        | 0.004        | 9.17E-01        | 1.83E-03       |
| rs10513789  | 3:182760073      | T/G    | 0.81                    | 0.148 | 0.012 | 1.22E-34  | 0.79    | 0.003         | 0.004        | 5.13E-01        | 6.75E-03       |
| rs34311866  | 4:951947         | C/T    | 0.19                    | 0.213 | 0.012 | 9.98E-70  | 0.18    | 0.002         | 0.005        | 6.04E-01        | 1.41E-02       |
| rs4698412   | 4:15737348       | A/G    | 0.55                    | 0.104 | 0.009 | 2.06E-28  | 0.54    | 0.002         | 0.004        | 6.16E-01        | 5.30E-03       |
| rs6854006   | 4:77198054       | C/T    | 0.64                    | 0.091 | 0.010 | 5.82E-21  | 0.64    | -0.007        | 0.004        | 6.93E-02        | 3.85E-03       |
| rs356182    | 4:90626111       | G/A    | 0.37                    | 0.277 | 0.011 | 3.89E-154 | 0.35    | <0.001        | 0.004        | 9.27E-01        | 3.60E-02       |
| rs13117519  | 4:114369065      | T/C    | 0.17                    | 0.088 | 0.012 | 9.82E-13  | 0.16    | -0.002        | 0.005        | 6.68E-01        | 2.20E-03       |
| rs62333164  | 4:170583157      | G/A    | 0.67                    | 0.064 | 0.010 | 2.00E-10  | 0.67    | 0.006         | 0.004        | 1.22E-01        | 1.79E-03       |
| rs1867598   | 5:60137959       | G/A    | 0.10                    | 0.155 | 0.016 | 2.52E-23  | 0.09    | -0.005        | 0.006        | 4.08E-01        | 4.27E-03       |
| rs26431     | 5:102365794      | C/G    | 0.70                    | 0.062 | 0.010 | 1.57E-09  | 0.70    | -0.006        | 0.004        | 1.36E-01        | 1.61E-03       |
| rs11950533  | 5:134199105      | C/A    | 0.90                    | 0.092 | 0.016 | 7.16E-09  | 0.88    | -0.002        | 0.006        | 7.02E-01        | 1.54E-03       |
| rs12528068  | 6:72487762       | T/C    | 0.28                    | 0.066 | 0.010 | 1.63E-10  | 0.28    | 0.003         | 0.004        | 4.49E-01        | 1.76E-03       |
| rs997368    | 6:112243291      | A/G    | 0.80                    | 0.071 | 0.012 | 1.84E-09  | 0.79    | 0.003         | 0.005        | 4.65E-01        | 1.60E-03       |
| rs75859381  | 6:133210361      | C/T    | 0.03                    | 0.221 | 0.034 | 1.04E-10  | 0.03    | 0.008         | 0.011        | 4.57E-01        | 3.08E-03       |
| rs199351    | 7:23300049       | A/C    | 0.59                    | 0.102 | 0.010 | 5.25E-26  | 0.57    | -0.003        | 0.004        | 4.13E-01        | 4.98E-03       |
| rs76949143  | 7:66009851       | T/A    | 0.95                    | 0.143 | 0.025 | 1.43E-08  | 0.94    | 0.009         | 0.008        | 2.58E-01        | 1.97E-03       |
| rs1293298   | 8:11712443       | A/C    | 0.74                    | 0.093 | 0.011 | 3.99E-16  | 0.76    | 0.004         | 0.004        | 3.41E-01        | 3.29E-03       |
| rs2280104   | 8:22525980       | T/C    | 0.36                    | 0.056 | 0.010 | 1.16E-08  | 0.35    | -0.006        | 0.004        | 1.04E-01        | 1.43E-03       |
| rs2086641   | 8:130901909      | C/T    | 0.28                    | 0.060 | 0.011 | 1.81E-08  | 0.26    | -0.005        | 0.004        | 2.01E-01        | 1.47E-03       |
| rs13294100  | 9:17579690       | G/T    | 0.66                    | 0.086 | 0.010 | 8.72E-18  | 0.63    | <b>0.009</b>  | <b>0.004</b> | <b>1.65E-02</b> | 3.32E-03       |
| rs6476434   | 9:34046391       | C/T    | 0.27                    | 0.062 | 0.011 | 6.58E-09  | 0.26    | -0.005        | 0.004        | 1.95E-01        | 1.48E-03       |
| rs896435    | 10:15557406      | T/C    | 0.69                    | 0.074 | 0.010 | 3.41E-13  | 0.67    | 0.006         | 0.004        | 1.41E-01        | 2.31E-03       |
| rs10748818  | 10:104015279     | G/A    | 0.15                    | 0.079 | 0.013 | 1.05E-09  | 0.14    | <b>-0.011</b> | <b>0.005</b> | <b>2.47E-02</b> | 1.58E-03       |
| rs117896735 | 10:121536327     | A/G    | 0.02                    | 0.435 | 0.039 | 2.36E-28  | 0.01    | 0.007         | 0.013        | 5.92E-01        | 6.19E-03       |
| rs7938782   | 11:10558777      | A/G    | 0.88                    | 0.087 | 0.015 | 2.12E-09  | 0.86    | <b>0.015</b>  | <b>0.006</b> | <b>8.85E-03</b> | 1.63E-03       |
| rs12283611  | 11:83487277      | C/A    | 0.59                    | 0.064 | 0.010 | 2.61E-10  | 0.57    | -0.001        | 0.004        | 7.58E-01        | 2.02E-03       |
| rs3802920   | 11:133787001     | T/G    | 0.21                    | 0.107 | 0.012 | 6.26E-20  | 0.20    | -0.008        | 0.005        | 6.51E-02        | 3.76E-03       |
| rs76904798  | 12:40614434      | T/C    | 0.14                    | 0.144 | 0.013 | 1.52E-28  | 0.13    | -0.003        | 0.005        | 5.94E-01        | 5.12E-03       |
| rs7134559   | 12:46419086      | C/T    | 0.60                    | 0.054 | 0.010 | 3.96E-08  | 0.61    | <b>0.009</b>  | <b>0.004</b> | <b>9.77E-03</b> | 1.40E-03       |
| rs10847864  | 12:123326598     | T/G    | 0.36                    | 0.148 | 0.012 | 1.47E-37  | 0.35    | <0.001        | 0.004        | 9.56E-01        | 1.01E-02       |
| rs9568188   | 13:49927732      | T/C    | 0.74                    | 0.062 | 0.011 | 1.15E-08  | 0.72    | -0.003        | 0.004        | 4.18E-01        | 1.47E-03       |
| rs4771268   | 13:97865021      | T/C    | 0.23                    | 0.068 | 0.011 | 1.45E-09  | 0.24    | -0.003        | 0.004        | 5.51E-01        | 1.61E-03       |
| rs12147950  | 14:37989270      | C/T    | 0.56                    | 0.053 | 0.010 | 3.54E-08  | 0.56    | 0.007         | 0.004        | 5.86E-02        | 1.38E-03       |



| SNP        | Chr:Pos (GRCh37) | E/A/BA | PD (Nalls et al., 2019) |       |       |          | Outcome |               |              |                         |                |
|------------|------------------|--------|-------------------------|-------|-------|----------|---------|---------------|--------------|-------------------------|----------------|
|            |                  |        | EAF                     | Beta  | SE    | p        | EAF     | Beta          | SE           | p                       | R <sup>2</sup> |
| rs11158026 | 14:55348869      | C/T    | 0.68                    | 0.084 | 0.010 | 1.66E-16 | 0.66    | -0.001        | 0.004        | 8.68E-01                | 3.11E-03       |
| rs3742785  | 14:75373034      | A/C    | 0.79                    | 0.071 | 0.012 | 1.92E-09 | 0.77    | -0.001        | 0.004        | 9.01E-01                | 1.68E-03       |
| rs979812   | 14:88464264      | T/G    | 0.44                    | 0.061 | 0.009 | 6.19E-11 | 0.44    | <b>0.008</b>  | <b>0.004</b> | <b>2.96E-02</b>         | 1.84E-03       |
| rs2251086  | 15:61997385      | C/T    | 0.86                    | 0.119 | 0.014 | 6.08E-18 | 0.84    | <0.001        | 0.005        | 9.53E-01                | 3.42E-03       |
| rs4697339  | 16:19277493      | A/T    | 0.45                    | 0.063 | 0.010 | 2.76E-11 |         |               |              | Excluded for reverse MR |                |
| rs11150601 | 16:30977799      | A/G    | 0.64                    | 0.091 | 0.010 | 5.12E-20 | 0.63    | -0.005        | 0.004        | 1.72E-01                | 3.77E-03       |
| rs3104783  | 16:52636242      | A/C    | 0.43                    | 0.067 | 0.009 | 1.29E-12 | 0.44    | <b>-0.008</b> | <b>0.004</b> | <b>3.35E-02</b>         | 2.19E-03       |
| rs12600861 | 17:7355621       | C/A    | 0.35                    | 0.056 | 0.010 | 1.01E-08 | 0.35    | <b>-0.009</b> | <b>0.004</b> | <b>1.37E-02</b>         | 1.46E-03       |
| rs850738   | 17:42434630      | G/A    | 0.39                    | 0.071 | 0.011 | 1.29E-11 | 0.39    | 0.006         | 0.004        | 9.01E-02                | 2.41E-03       |
| rs62053943 | 17:43744203      | C/T    | 0.84                    | 0.270 | 0.016 | 3.58E-68 | 0.86    | 0.008         | 0.005        | 1.23E-01                | 1.91E-02       |
| rs61169879 | 17:59917366      | T/C    | 0.16                    | 0.082 | 0.013 | 9.28E-10 | 0.17    | 0.001         | 0.005        | 7.83E-01                | 1.84E-03       |
| rs666463   | 17:76425480      | A/T    | 0.83                    | 0.076 | 0.013 | 3.20E-09 | 0.84    | -0.001        | 0.005        | 8.93E-01                | 1.61E-03       |
| rs1941685  | 18:31304318      | T/G    | 0.50                    | 0.053 | 0.009 | 1.69E-08 | 0.52    | -0.002        | 0.004        | 6.01E-01                | 1.41E-03       |
| rs12456492 | 18:40673380      | G/A    | 0.32                    | 0.098 | 0.010 | 3.80E-23 | 0.32    | -0.006        | 0.004        | 1.16E-01                | 4.19E-03       |
| rs8087969  | 18:48683589      | G/T    | 0.45                    | 0.058 | 0.010 | 1.41E-08 | 0.44    | 0.002         | 0.004        | 5.22E-01                | 1.65E-03       |
| rs5818311  | 19:2341047       | C/T    | 0.31                    | 0.070 | 0.011 | 4.18E-10 | 0.33    | -0.004        | 0.004        | 2.87E-01                | 2.06E-03       |
| rs77351827 | 20:6006041       | T/C    | 0.13                    | 0.080 | 0.014 | 8.87E-09 | 0.12    | 0.006         | 0.005        | 3.05E-01                | 1.43E-03       |
| rs2248244  | 21:38852361      | A/G    | 0.28                    | 0.071 | 0.011 | 2.74E-11 | 0.28    | 0.004         | 0.004        | 2.79E-01                | 2.07E-03       |

NA, not available; EA/BA, effect allele/base allele; EAF, effect allele frequency; SE, standard error.

SNPs associated with PD and corresponding betas come from Nalls et al., Lancet Neurol 2019;18,1091-1102. Associations with smoking, alcohol, and coffee come from Liu et al., Nat Genet 2019;51, 237-244; Zhong et al., Hum Mol Genet 2019;28, 2449-2457; and Wootton et al., Psychol Med 2019;50, 2435-2443.

Bold coefficients and corresponding SE and p-values are significant at  $p \leq 0.05$ ; those underlined with a solid line are negative and those underlined with a dashed line are positive. R<sup>2</sup> is the proportion of the variance of the exposure explained by the genetic variant according to the formula:  $2 \times \text{Beta}_{\text{exposure}} \times \text{EAF}_{\text{exposure}} \times (1 - \text{EAF}_{\text{exposure}})$ .

**Supplementary Figure 1.** Survival bias in Mendelian randomization studies of diseases in elderly populations.

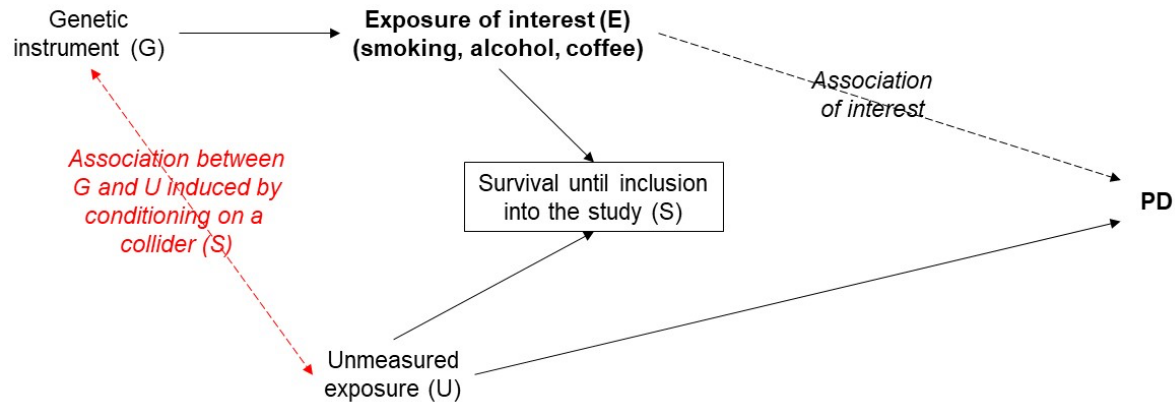

If both the exposure of interest (E) and an unmeasured exposure (U) influence survival (S), conditioning on survival up to the age at inclusion into the study creates an association between U and G (and E) (red dashed double arrow) because S is a collider. If U is not taken into account in the analysis, the association of G (and E) with PD is biased due to the association between U and G. The bias is more important for exposures that have an important effect on survival, and if there is an interaction between U and E in determining survival.

The importance and direction of the bias depends on the direction of the U-S and E-S associations (discordant or concordant) and of the  $U \times E$  interaction for S. Depending on these parameters, the bias can go in any direction: it can distort associations towards the null (e.g., true associations that weaken as age increases), or it can create a false association between G and PD in situations where there is no true association (e.g., no association in younger subjects while there is one in older subjects) or make a true association seem stronger; in some extreme situations, it can even revert the direction of a true association (e.g., true positive association becomes negative as age increases).

MR estimates of the association between E and PD are based on the association between G and E, and the association between G and PD. In one-sample MR, both associations are estimated in the same sample and are likely to be similarly biased; therefore, taking the ratio of these associations cancels out much of the bias. Alternatively, in two-sample MR, only the association between G and PD is estimated in the study sample, and the bias of MR estimates equals the bias seen for the G and PD association (Smit RA et al., *Epidemiology* 2019;30(6):813-816).

**Supplementary Figure 2.** MR analyses of the relation of smoking, alcohol, and coffee drinking with PD: (A) Plots relating the effects sizes of the SNP-exposure (x-axis) and SNP-PD (y-axis, log OR) associations with standard error bars: the slope of the lines corresponds to causal estimates using different methods; (B) funnel plots of individual variant effects plotted against the inverse of their standard error.

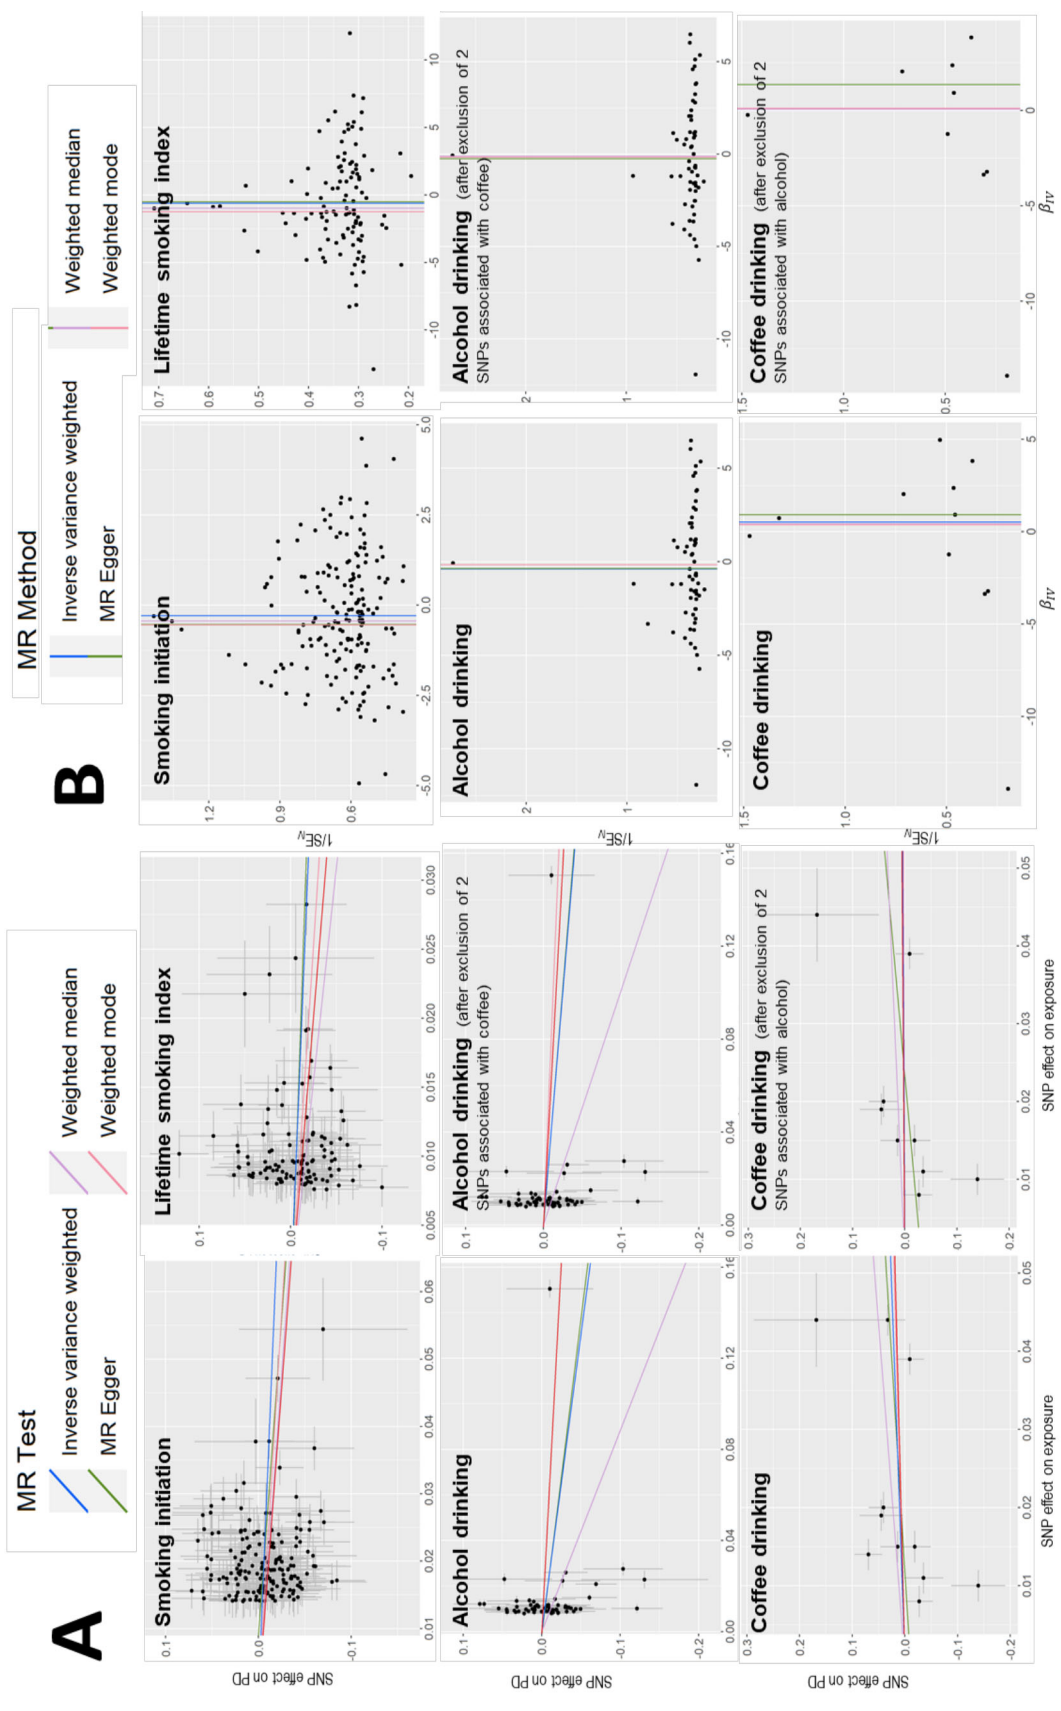

**Supplementary Figure 3.** Reverse MR analyses of the relation of PD with smoking initiation, lifetime smoking index, and alcohol and coffee drinking: (A) Plots relating the effects sizes of the SNP-PD (x-axis) and SNP-outcomes (smoking, coffee, alcohol; y-axis, log OR) associations with standard error bars: the slope of the lines corresponds to causal estimates using different methods; (B) funnel plots of individual variant effects plotted against the inverse of their standard error.

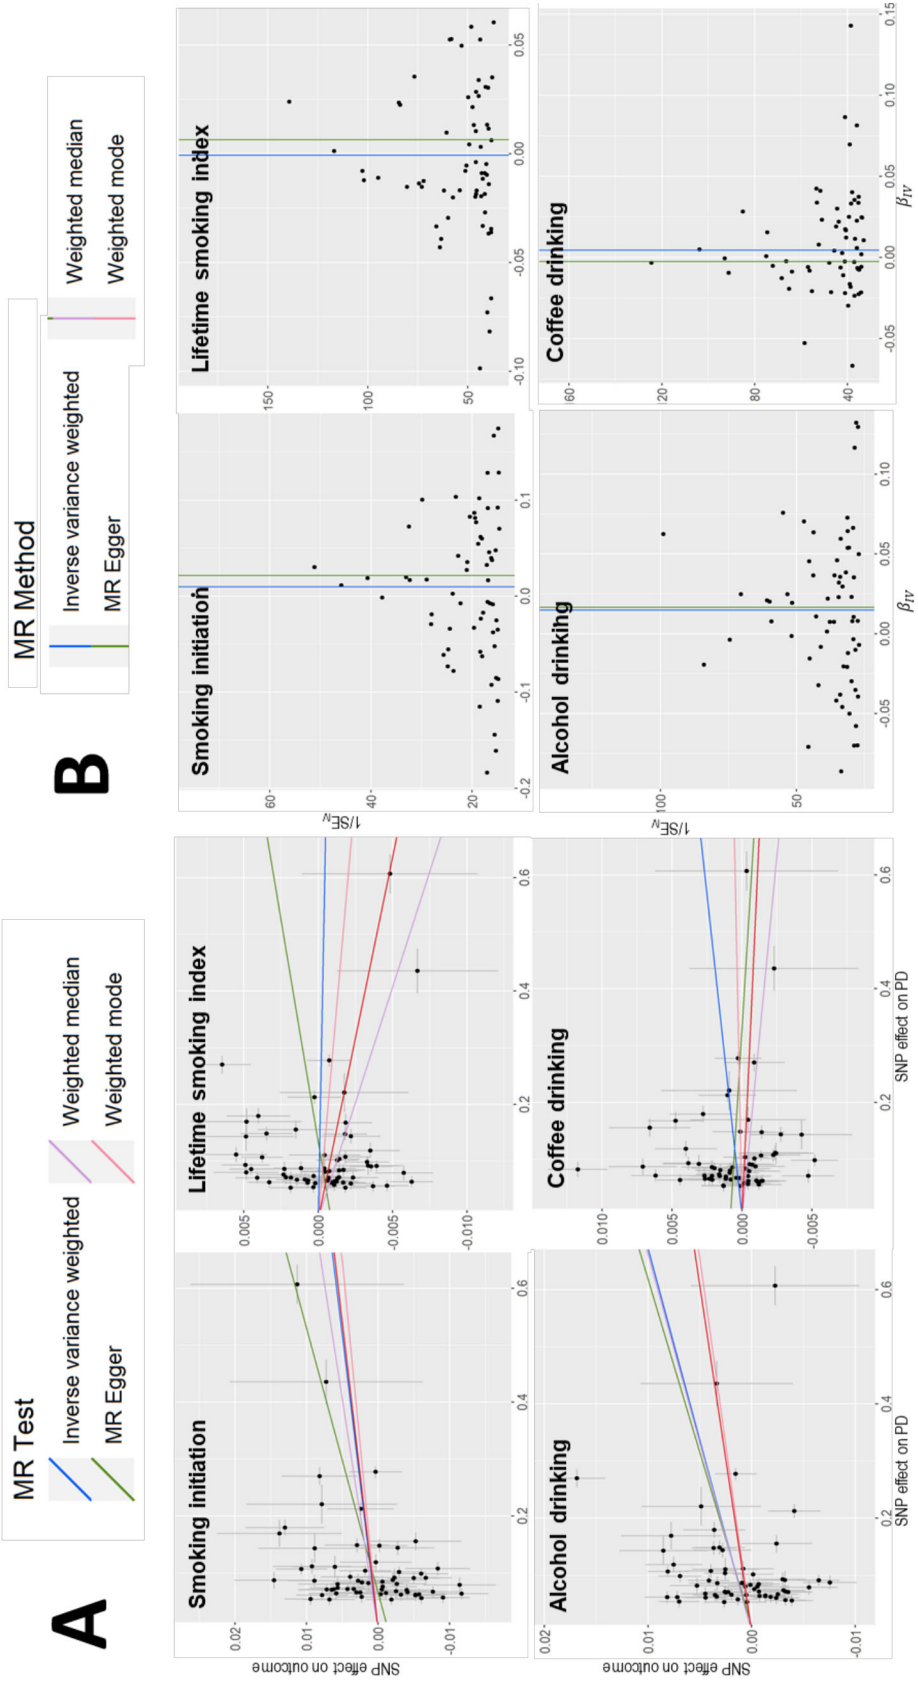

Supplement: NIHMS1789361-supplement-Supplementary_material.pdf [file NIHMS1789361-supplement-Supplementary_material.pdf]
